# Supplementary material for: Putative causal inference for the relationship between obesity and sex hormones in males: a bidirectional Mendelian randomization study
Source: PeerJ. 2023 Jul 19;11:e15760. doi: 10.7717/peerj.15760 (PMC10362853; doi:10.7717/peerj.15760)
Supplement: Supplemental Information 2 [file peerj-11-15760-s002.xlsx]

## Sheet: Contents
Table	Title
S11	Supplementary Table S11: Leave one out analysis for the effect of BMI on BioT level.
S12	Supplementary Table S12: Leave one out analysis for the effect of BMI on estradiol level.
S13	Supplementary Table S13: Leave one out analysis for the effect of BMI on SHBG level.
S14	Supplementary Table S14: Leave one out analysis for the effect of SHBG level on BMI.
S15	Supplementary Table S15: Leave one out analysis for the effect of SHBG level on BioT level.
S16	Supplementary Table S16: Leave one out analysis for the effect of SHBG level on estradiol level.
S17	Supplementary Table S17: Leave one out analysis for the effect of BioT level on SHBG level.

## Sheet: Table S11
Supplementary Table S11: Leave one out analysis for the effect of BMI on BioT level.
Exposure	Outcome	Samplesize	SNP	beta	se	p
Body mass index (BMI)	Bioavailable testosterone levels	178782	rs10063055	-0.13869	0.0132708	1.45406e-25
Body mass index (BMI)	Bioavailable testosterone levels	178782	rs10099330	-0.139474	0.0132668	7.52718e-26
Body mass index (BMI)	Bioavailable testosterone levels	178782	rs10160769	-0.139299	0.0132753	9.29449e-26
Body mass index (BMI)	Bioavailable testosterone levels	178782	rs10169594	-0.138875	0.0132765	1.31565e-25
Body mass index (BMI)	Bioavailable testosterone levels	178782	rs10182416	-0.140246	0.0131983	2.25505e-26
Body mass index (BMI)	Bioavailable testosterone levels	178782	rs10423928	-0.140321	0.0132952	4.85733e-26
Body mass index (BMI)	Bioavailable testosterone levels	178782	rs10505836	-0.139561	0.013263	6.79768e-26
Body mass index (BMI)	Bioavailable testosterone levels	178782	rs10510025	-0.138165	0.0132533	1.90788e-25
Body mass index (BMI)	Bioavailable testosterone levels	178782	rs1064213	-0.139485	0.013275	7.99301e-26
Body mass index (BMI)	Bioavailable testosterone levels	178782	rs10742752	-0.138827	0.0132749	1.34811e-25
Body mass index (BMI)	Bioavailable testosterone levels	178782	rs10756714	-0.139494	0.0132922	9.16303e-26
Body mass index (BMI)	Bioavailable testosterone levels	178782	rs10756792	-0.139831	0.013265	5.57229e-26
Body mass index (BMI)	Bioavailable testosterone levels	178782	rs10760277	-0.13948	0.0132704	7.71944e-26
Body mass index (BMI)	Bioavailable testosterone levels	178782	rs10780248	-0.139164	0.0132774	1.05346e-25
Body mass index (BMI)	Bioavailable testosterone levels	178782	rs1078141	-0.13925	0.0132789	9.9576e-26
Body mass index (BMI)	Bioavailable testosterone levels	178782	rs10799778	-0.138609	0.0132722	1.56774e-25
Body mass index (BMI)	Bioavailable testosterone levels	178782	rs10809621	-0.139052	0.0132784	1.16144e-25
Body mass index (BMI)	Bioavailable testosterone levels	178782	rs10824211	-0.139069	0.0132824	1.18501e-25
Body mass index (BMI)	Bioavailable testosterone levels	178782	rs10832778	-0.139809	0.0132317	4.27539e-26
Body mass index (BMI)	Bioavailable testosterone levels	178782	rs10927006	-0.140071	0.0132046	2.74364e-26
Body mass index (BMI)	Bioavailable testosterone levels	178782	rs10965698	-0.139566	0.0132537	6.26087e-26
Body mass index (BMI)	Bioavailable testosterone levels	178782	rs10989067	-0.139452	0.0132785	8.4515e-26
Body mass index (BMI)	Bioavailable testosterone levels	178782	rs11001963	-0.138688	0.0132693	1.43811e-25
Body mass index (BMI)	Bioavailable testosterone levels	178782	rs11009685	-0.139255	0.0132734	9.47388e-26
Body mass index (BMI)	Bioavailable testosterone levels	178782	rs11012732	-0.137381	0.0132345	3.03924e-25
Body mass index (BMI)	Bioavailable testosterone levels	178782	rs11079849	-0.139612	0.0132833	7.74158e-26
Body mass index (BMI)	Bioavailable testosterone levels	178782	rs11099020	-0.139155	0.0132804	1.08789e-25
Body mass index (BMI)	Bioavailable testosterone levels	178782	rs11115160	-0.138835	0.0132742	1.33287e-25
Body mass index (BMI)	Bioavailable testosterone levels	178782	rs11122450	-0.139168	0.0132761	1.03824e-25
Body mass index (BMI)	Bioavailable testosterone levels	178782	rs11134679	-0.139111	0.0132877	1.19764e-25
Body mass index (BMI)	Bioavailable testosterone levels	178782	rs11150745	-0.140792	0.0132191	1.73122e-26
Body mass index (BMI)	Bioavailable testosterone levels	178782	rs111598585	-0.13957	0.013257	6.41624e-26
Body mass index (BMI)	Bioavailable testosterone levels	178782	rs11165643	-0.139115	0.0132927	1.24419e-25
Body mass index (BMI)	Bioavailable testosterone levels	178782	rs111689389	-0.138475	0.0132599	1.57552e-25
Body mass index (BMI)	Bioavailable testosterone levels	178782	rs11218510	-0.138325	0.0132591	1.76283e-25
Body mass index (BMI)	Bioavailable testosterone levels	178782	rs1126930	-0.138751	0.0132736	1.41701e-25
Body mass index (BMI)	Bioavailable testosterone levels	178782	rs113079574	-0.139213	0.0132768	1.00766e-25
Body mass index (BMI)	Bioavailable testosterone levels	178782	rs113603865	-0.13903	0.0132841	1.23848e-25
Body mass index (BMI)	Bioavailable testosterone levels	178782	rs113624107	-0.139363	0.0132728	8.6479e-26
Body mass index (BMI)	Bioavailable testosterone levels	178782	rs11525873	-0.139013	0.0132825	1.23862e-25
Body mass index (BMI)	Bioavailable testosterone levels	178782	rs11607476	-0.139054	0.013285	1.22491e-25
Body mass index (BMI)	Bioavailable testosterone levels	178782	rs11610621	-0.13962	0.013254	6.00856e-26
Body mass index (BMI)	Bioavailable testosterone levels	178782	rs11630647	-0.139081	0.0132768	1.119e-25
Body mass index (BMI)	Bioavailable testosterone levels	178782	rs116374395	-0.13834	0.0132456	1.55756e-25
Body mass index (BMI)	Bioavailable testosterone levels	178782	rs11642090	-0.138973	0.0132767	1.21937e-25
Body mass index (BMI)	Bioavailable testosterone levels	178782	rs11656076	-0.138998	0.0132799	1.2269e-25
Body mass index (BMI)	Bioavailable testosterone levels	178782	rs1167311	-0.13899	0.01329	1.34287e-25
Body mass index (BMI)	Bioavailable testosterone levels	178782	rs11675464	-0.139523	0.0132621	6.95557e-26
Body mass index (BMI)	Bioavailable testosterone levels	178782	rs11691869	-0.137447	0.0132232	2.63059e-25
Body mass index (BMI)	Bioavailable testosterone levels	178782	rs11699828	-0.139218	0.0132751	9.89737e-26
Body mass index (BMI)	Bioavailable testosterone levels	178782	rs11709402	-0.13892	0.0132962	1.49404e-25
Body mass index (BMI)	Bioavailable testosterone levels	178782	rs117118217	-0.138599	0.0132638	1.47462e-25
Body mass index (BMI)	Bioavailable testosterone levels	178782	rs117342986	-0.138789	0.013273	1.36798e-25
Body mass index (BMI)	Bioavailable testosterone levels	178782	rs11757278	-0.139773	0.0132521	5.22917e-26
Body mass index (BMI)	Bioavailable testosterone levels	178782	rs11778219	-0.13862	0.0132664	1.48165e-25
Body mass index (BMI)	Bioavailable testosterone levels	178782	rs118136827	-0.138076	0.0132182	1.5304e-25
Body mass index (BMI)	Bioavailable testosterone levels	178782	rs11919665	-0.139424	0.0132681	7.91738e-26
Body mass index (BMI)	Bioavailable testosterone levels	178782	rs12072739	-0.139377	0.0132737	8.61342e-26
Body mass index (BMI)	Bioavailable testosterone levels	178782	rs12088284	-0.138964	0.0132796	1.25809e-25
Body mass index (BMI)	Bioavailable testosterone levels	178782	rs12140153	-0.138896	0.0132925	1.47786e-25
Body mass index (BMI)	Bioavailable testosterone levels	178782	rs12149660	-0.138813	0.0132807	1.4314e-25
Body mass index (BMI)	Bioavailable testosterone levels	178782	rs12259464	-0.138717	0.0132747	1.47044e-25
Body mass index (BMI)	Bioavailable testosterone levels	178782	rs12273545	-0.139041	0.0132776	1.16274e-25
Body mass index (BMI)	Bioavailable testosterone levels	178782	rs1229984	-0.13921	0.0132756	1.0004e-25
Body mass index (BMI)	Bioavailable testosterone levels	178782	rs12364470	-0.139514	0.0132718	7.60242e-26
Body mass index (BMI)	Bioavailable testosterone levels	178782	rs12459368	-0.139304	0.0132808	9.6929e-26
Body mass index (BMI)	Bioavailable testosterone levels	178782	rs12462975	-0.139066	0.013291	1.27565e-25
Body mass index (BMI)	Bioavailable testosterone levels	178782	rs12541408	-0.140478	0.0131683	1.43829e-26
Body mass index (BMI)	Bioavailable testosterone levels	178782	rs1266874	-0.13914	0.0132803	1.1e-25
Body mass index (BMI)	Bioavailable testosterone levels	178782	rs12681792	-0.138959	0.0132777	1.24341e-25
Body mass index (BMI)	Bioavailable testosterone levels	178782	rs12692596	-0.139316	0.0132748	9.12327e-26
Body mass index (BMI)	Bioavailable testosterone levels	178782	rs12696039	-0.138034	0.0131982	1.33954e-25
Body mass index (BMI)	Bioavailable testosterone levels	178782	rs1286058	-0.139141	0.0132806	1.10174e-25
Body mass index (BMI)	Bioavailable testosterone levels	178782	rs12881629	-0.139896	0.0132303	3.93955e-26
Body mass index (BMI)	Bioavailable testosterone levels	178782	rs12921986	-0.138734	0.01327	1.39348e-25
Body mass index (BMI)	Bioavailable testosterone levels	178782	rs12937411	-0.140593	0.0132067	1.82726e-26
Body mass index (BMI)	Bioavailable testosterone levels	178782	rs1296328	-0.138342	0.0132792	2.05396e-25
Body mass index (BMI)	Bioavailable testosterone levels	178782	rs12974458	-0.138461	0.0132707	1.74225e-25
Body mass index (BMI)	Bioavailable testosterone levels	178782	rs13012070	-0.139039	0.0132777	1.16597e-25
Body mass index (BMI)	Bioavailable testosterone levels	178782	rs13033310	-0.139249	0.013273	9.49243e-26
Body mass index (BMI)	Bioavailable testosterone levels	178782	rs13097918	-0.138694	0.0132709	1.45016e-25
Body mass index (BMI)	Bioavailable testosterone levels	178782	rs13107325	-0.136326	0.0132021	5.37408e-25
Body mass index (BMI)	Bioavailable testosterone levels	178782	rs13176429	-0.13835	0.0132552	1.67282e-25
Body mass index (BMI)	Bioavailable testosterone levels	178782	rs1320251	-0.139544	0.0132824	8.10793e-26
Body mass index (BMI)	Bioavailable testosterone levels	178782	rs13218383	-0.138172	0.0132439	1.7547e-25
Body mass index (BMI)	Bioavailable testosterone levels	178782	rs1322842	-0.138172	0.0132373	1.66149e-25
Body mass index (BMI)	Bioavailable testosterone levels	178782	rs13248187	-0.138566	0.0132714	1.61142e-25
Body mass index (BMI)	Bioavailable testosterone levels	178782	rs1327259	-0.138725	0.0132785	1.50676e-25
Body mass index (BMI)	Bioavailable testosterone levels	178782	rs13291723	-0.13915	0.0132757	1.04969e-25
Body mass index (BMI)	Bioavailable testosterone levels	178782	rs1330199	-0.138861	0.0132762	1.32633e-25
Body mass index (BMI)	Bioavailable testosterone levels	178782	rs13420048	-0.13946	0.0132757	8.20195e-26
Body mass index (BMI)	Bioavailable testosterone levels	178782	rs13427822	-0.139866	0.0132601	5.19448e-26
Body mass index (BMI)	Bioavailable testosterone levels	178782	rs1346841	-0.139286	0.0132759	9.43911e-26
Body mass index (BMI)	Bioavailable testosterone levels	178782	rs1360201	-0.139249	0.0132775	9.85024e-26
Body mass index (BMI)	Bioavailable testosterone levels	178782	rs13642	-0.139691	0.0132677	6.37219e-26
Body mass index (BMI)	Bioavailable testosterone levels	178782	rs140159717	-0.138598	0.0132705	1.5598e-25
Body mass index (BMI)	Bioavailable testosterone levels	178782	rs1438945	-0.140072	0.0132074	2.8064e-26
Body mass index (BMI)	Bioavailable testosterone levels	178782	rs1441264	-0.138651	0.013284	1.67257e-25
Body mass index (BMI)	Bioavailable testosterone levels	178782	rs1451963	-0.139403	0.0132699	8.17427e-26
Body mass index (BMI)	Bioavailable testosterone levels	178782	rs1458156	-0.138921	0.0132815	1.32267e-25
Body mass index (BMI)	Bioavailable testosterone levels	178782	rs145981104	-0.139506	0.0132595	6.89673e-26
Body mass index (BMI)	Bioavailable testosterone levels	178782	rs146569428	-0.138847	0.0132747	1.32532e-25
Body mass index (BMI)	Bioavailable testosterone levels	178782	rs1471093	-0.137887	0.0132077	1.63039e-25
Body mass index (BMI)	Bioavailable testosterone levels	178782	rs1471740	-0.140215	0.0132418	3.3598e-26
Body mass index (BMI)	Bioavailable testosterone levels	178782	rs147568678	-0.139319	0.0132713	8.84674e-26
Body mass index (BMI)	Bioavailable testosterone levels	178782	rs1477290	-0.140359	0.0132726	3.88789e-26
Body mass index (BMI)	Bioavailable testosterone levels	178782	rs147730268	-0.138253	0.0132789	2.19785e-25
Body mass index (BMI)	Bioavailable testosterone levels	178782	rs1503526	-0.139289	0.013282	9.90425e-26
Body mass index (BMI)	Bioavailable testosterone levels	178782	rs156201	-0.138604	0.0132644	1.47597e-25
Body mass index (BMI)	Bioavailable testosterone levels	178782	rs156914	-0.13961	0.0132518	5.94828e-26
Body mass index (BMI)	Bioavailable testosterone levels	178782	rs1582931	-0.138794	0.0132776	1.41569e-25
Body mass index (BMI)	Bioavailable testosterone levels	178782	rs1608113	-0.138738	0.0132713	1.40454e-25
Body mass index (BMI)	Bioavailable testosterone levels	178782	rs1609010	-0.138053	0.0132769	2.53217e-25
Body mass index (BMI)	Bioavailable testosterone levels	178782	rs16916303	-0.139559	0.0132617	6.7325e-26
Body mass index (BMI)	Bioavailable testosterone levels	178782	rs17056301	-0.139179	0.0132767	1.03442e-25
Body mass index (BMI)	Bioavailable testosterone levels	178782	rs17132130	-0.139404	0.0132773	8.69006e-26
Body mass index (BMI)	Bioavailable testosterone levels	178782	rs17149254	-0.138003	0.0132502	2.11362e-25
Body mass index (BMI)	Bioavailable testosterone levels	178782	rs17289010	-0.139199	0.0132779	1.02851e-25
Body mass index (BMI)	Bioavailable testosterone levels	178782	rs17399739	-0.138972	0.0132813	1.26742e-25
Body mass index (BMI)	Bioavailable testosterone levels	178782	rs17446299	-0.138638	0.0132665	1.4614e-25
Body mass index (BMI)	Bioavailable testosterone levels	178782	rs17544384	-0.138696	0.0132699	1.43661e-25
Body mass index (BMI)	Bioavailable testosterone levels	178782	rs17668356	-0.140198	0.0132379	3.2926e-26
Body mass index (BMI)	Bioavailable testosterone levels	178782	rs17770336	-0.138963	0.0133033	1.53279e-25
Body mass index (BMI)	Bioavailable testosterone levels	178782	rs1778830	-0.139032	0.0132811	1.20626e-25
Body mass index (BMI)	Bioavailable testosterone levels	178782	rs1788808	-0.137856	0.0132649	2.6814e-25
Body mass index (BMI)	Bioavailable testosterone levels	178782	rs1793636	-0.13926	0.0132757	9.62103e-26
Body mass index (BMI)	Bioavailable testosterone levels	178782	rs1805123	-0.139353	0.013278	9.10214e-26
Body mass index (BMI)	Bioavailable testosterone levels	178782	rs1834144	-0.138449	0.0132638	1.65971e-25
Body mass index (BMI)	Bioavailable testosterone levels	178782	rs1861410	-0.139465	0.0132943	9.54639e-26
Body mass index (BMI)	Bioavailable testosterone levels	178782	rs1884897	-0.139373	0.0132903	9.93077e-26
Body mass index (BMI)	Bioavailable testosterone levels	178782	rs1919243	-0.138941	0.0132772	1.25583e-25
Body mass index (BMI)	Bioavailable testosterone levels	178782	rs1967772	-0.139093	0.0132843	1.18072e-25
Body mass index (BMI)	Bioavailable testosterone levels	178782	rs2035936	-0.139122	0.0132872	1.18251e-25
Body mass index (BMI)	Bioavailable testosterone levels	178782	rs2051559	-0.139151	0.0132809	1.09573e-25
Body mass index (BMI)	Bioavailable testosterone levels	178782	rs2075466	-0.139072	0.0132779	1.13861e-25
Body mass index (BMI)	Bioavailable testosterone levels	178782	rs2102278	-0.139243	0.0132736	9.57833e-26
Body mass index (BMI)	Bioavailable testosterone levels	178782	rs2133561	-0.138918	0.0132806	1.3146e-25
Body mass index (BMI)	Bioavailable testosterone levels	178782	rs213518	-0.139199	0.0132751	1.0049e-25
Body mass index (BMI)	Bioavailable testosterone levels	178782	rs2153740	-0.139173	0.0132757	1.03093e-25
Body mass index (BMI)	Bioavailable testosterone levels	178782	rs2172131	-0.138769	0.0132804	1.47833e-25
Body mass index (BMI)	Bioavailable testosterone levels	178782	rs217672	-0.139113	0.0132837	1.15644e-25
Body mass index (BMI)	Bioavailable testosterone levels	178782	rs2192158	-0.139102	0.0132835	1.16419e-25
Body mass index (BMI)	Bioavailable testosterone levels	178782	rs2216931	-0.138154	0.0132579	1.99835e-25
Body mass index (BMI)	Bioavailable testosterone levels	178782	rs2234458	-0.139063	0.0132945	1.31617e-25
Body mass index (BMI)	Bioavailable testosterone levels	178782	rs2253310	-0.139684	0.0132731	6.71293e-26
Body mass index (BMI)	Bioavailable testosterone levels	178782	rs2271189	-0.13794	0.0132423	2.08204e-25
Body mass index (BMI)	Bioavailable testosterone levels	178782	rs2289379	-0.139168	0.0132828	1.0984e-25
Body mass index (BMI)	Bioavailable testosterone levels	178782	rs2307111	-0.13675	0.013253	5.81649e-25
Body mass index (BMI)	Bioavailable testosterone levels	178782	rs2342892	-0.138243	0.0132435	1.65318e-25
Body mass index (BMI)	Bioavailable testosterone levels	178782	rs2381404	-0.139397	0.0132695	8.18539e-26
Body mass index (BMI)	Bioavailable testosterone levels	178782	rs2383377	-0.139229	0.0132735	9.68424e-26
Body mass index (BMI)	Bioavailable testosterone levels	178782	rs2398861	-0.138638	0.0132794	1.62625e-25
Body mass index (BMI)	Bioavailable testosterone levels	178782	rs2425816	-0.139407	0.0132692	8.09874e-26
Body mass index (BMI)	Bioavailable testosterone levels	178782	rs2433733	-0.138903	0.0132855	1.38584e-25
Body mass index (BMI)	Bioavailable testosterone levels	178782	rs2439823	-0.139229	0.013292	1.1292e-25
Body mass index (BMI)	Bioavailable testosterone levels	178782	rs2482356	-0.138811	0.0132738	1.35413e-25
Body mass index (BMI)	Bioavailable testosterone levels	178782	rs2512892	-0.138679	0.0132729	1.49162e-25
Body mass index (BMI)	Bioavailable testosterone levels	178782	rs252761	-0.138624	0.0132652	1.46256e-25
Body mass index (BMI)	Bioavailable testosterone levels	178782	rs2568958	-0.139922	0.013285	6.13212e-26
Body mass index (BMI)	Bioavailable testosterone levels	178782	rs2569993	-0.13866	0.013269	1.46669e-25
Body mass index (BMI)	Bioavailable testosterone levels	178782	rs2606228	-0.138652	0.0132727	1.52162e-25
Body mass index (BMI)	Bioavailable testosterone levels	178782	rs2616143	-0.139203	0.0132784	1.02893e-25
Body mass index (BMI)	Bioavailable testosterone levels	178782	rs2618039	-0.138892	0.013281	1.34741e-25
Body mass index (BMI)	Bioavailable testosterone levels	178782	rs2678204	-0.138373	0.0132961	2.30238e-25
Body mass index (BMI)	Bioavailable testosterone levels	178782	rs2725371	-0.139079	0.0132832	1.1824e-25
Body mass index (BMI)	Bioavailable testosterone levels	178782	rs2791643	-0.138975	0.0132774	1.22426e-25
Body mass index (BMI)	Bioavailable testosterone levels	178782	rs28350	-0.138826	0.0132795	1.40246e-25
Body mass index (BMI)	Bioavailable testosterone levels	178782	rs28366156	-0.139415	0.0132858	9.25137e-26
Body mass index (BMI)	Bioavailable testosterone levels	178782	rs2837996	-0.139239	0.0132758	9.78902e-26
Body mass index (BMI)	Bioavailable testosterone levels	178782	rs28404639	-0.139108	0.0132769	1.09631e-25
Body mass index (BMI)	Bioavailable testosterone levels	178782	rs28489620	-0.138142	0.013243	1.78323e-25
Body mass index (BMI)	Bioavailable testosterone levels	178782	rs28568418	-0.139092	0.0132771	1.11275e-25
Body mass index (BMI)	Bioavailable testosterone levels	178782	rs2861685	-0.138693	0.0132843	1.62097e-25
Body mass index (BMI)	Bioavailable testosterone levels	178782	rs28670671	-0.139351	0.0132685	8.42546e-26
Body mass index (BMI)	Bioavailable testosterone levels	178782	rs2870111	-0.138252	0.0132606	1.89099e-25
Body mass index (BMI)	Bioavailable testosterone levels	178782	rs2875762	-0.139063	0.0132802	1.16819e-25
Body mass index (BMI)	Bioavailable testosterone levels	178782	rs2899644	-0.139131	0.0132788	1.09376e-25
Body mass index (BMI)	Bioavailable testosterone levels	178782	rs2920503	-0.138684	0.0132725	1.48095e-25
Body mass index (BMI)	Bioavailable testosterone levels	178782	rs2962334	-0.139107	0.0132783	1.11026e-25
Body mass index (BMI)	Bioavailable testosterone levels	178782	rs317656	-0.139038	0.0132801	1.19117e-25
Body mass index (BMI)	Bioavailable testosterone levels	178782	rs3213943	-0.138352	0.0132484	1.57882e-25
Body mass index (BMI)	Bioavailable testosterone levels	178782	rs32421	-0.138909	0.0132759	1.27376e-25
Body mass index (BMI)	Bioavailable testosterone levels	178782	rs329118	-0.140756	0.0131808	1.27775e-26
Body mass index (BMI)	Bioavailable testosterone levels	178782	rs329651	-0.137963	0.0132098	1.56197e-25
Body mass index (BMI)	Bioavailable testosterone levels	178782	rs34045288	-0.139641	0.0132942	8.28848e-26
Body mass index (BMI)	Bioavailable testosterone levels	178782	rs34153025	-0.13979	0.0132356	4.485e-26
Body mass index (BMI)	Bioavailable testosterone levels	178782	rs34234296	-0.139523	0.0132718	7.54964e-26
Body mass index (BMI)	Bioavailable testosterone levels	178782	rs34481751	-0.139468	0.0132714	7.85552e-26
Body mass index (BMI)	Bioavailable testosterone levels	178782	rs34517439	-0.13864	0.0133089	2.07219e-25
Body mass index (BMI)	Bioavailable testosterone levels	178782	rs34696181	-0.139103	0.0132772	1.10411e-25
Body mass index (BMI)	Bioavailable testosterone levels	178782	rs34811474	-0.138218	0.0132967	2.61674e-25
Body mass index (BMI)	Bioavailable testosterone levels	178782	rs349071	-0.139402	0.0132732	8.40874e-26
Body mass index (BMI)	Bioavailable testosterone levels	178782	rs35154326	-0.138814	0.0132745	1.35862e-25
Body mass index (BMI)	Bioavailable testosterone levels	178782	rs35364449	-0.139546	0.0132674	7.14159e-26
Body mass index (BMI)	Bioavailable testosterone levels	178782	rs355777	-0.139096	0.0132836	1.17066e-25
Body mass index (BMI)	Bioavailable testosterone levels	178782	rs35697587	-0.138958	0.0132867	1.34107e-25
Body mass index (BMI)	Bioavailable testosterone levels	178782	rs35697691	-0.137819	0.0131974	1.57939e-25
Body mass index (BMI)	Bioavailable testosterone levels	178782	rs35809007	-0.139924	0.0132589	4.91063e-26
Body mass index (BMI)	Bioavailable testosterone levels	178782	rs35957544	-0.139825	0.0132778	6.23424e-26
Body mass index (BMI)	Bioavailable testosterone levels	178782	rs36007635	-0.139776	0.0132579	5.48366e-26
Body mass index (BMI)	Bioavailable testosterone levels	178782	rs36061954	-0.137715	0.0131764	1.44072e-25
Body mass index (BMI)	Bioavailable testosterone levels	178782	rs3764625	-0.139433	0.0132663	7.74497e-26
Body mass index (BMI)	Bioavailable testosterone levels	178782	rs3784710	-0.13842	0.013304	2.3688e-25
Body mass index (BMI)	Bioavailable testosterone levels	178782	rs3803286	-0.13875	0.0132871	1.58677e-25
Body mass index (BMI)	Bioavailable testosterone levels	178782	rs3807566	-0.139185	0.0132769	1.03138e-25
Body mass index (BMI)	Bioavailable testosterone levels	178782	rs3814883	-0.138094	0.0132925	2.78719e-25
Body mass index (BMI)	Bioavailable testosterone levels	178782	rs3851998	-0.139433	0.0132673	7.80672e-26
Body mass index (BMI)	Bioavailable testosterone levels	178782	rs3866805	-0.139354	0.0132695	8.47727e-26
Body mass index (BMI)	Bioavailable testosterone levels	178782	rs3897102	-0.138588	0.0132651	1.50273e-25
Body mass index (BMI)	Bioavailable testosterone levels	178782	rs3901286	-0.137454	0.0131967	2.10054e-25
Body mass index (BMI)	Bioavailable testosterone levels	178782	rs3902951	-0.139603	0.0132563	6.2113e-26
Body mass index (BMI)	Bioavailable testosterone levels	178782	rs3935190	-0.138528	0.0132712	1.65853e-25
Body mass index (BMI)	Bioavailable testosterone levels	178782	rs394608	-0.139716	0.0132786	6.84727e-26
Body mass index (BMI)	Bioavailable testosterone levels	178782	rs40071	-0.14121	0.013183	8.98408e-27
Body mass index (BMI)	Bioavailable testosterone levels	178782	rs4017425	-0.137931	0.0132071	1.56672e-25
Body mass index (BMI)	Bioavailable testosterone levels	178782	rs4055791	-0.139364	0.013286	9.64803e-26
Body mass index (BMI)	Bioavailable testosterone levels	178782	rs406388	-0.139181	0.0132773	1.03856e-25
Body mass index (BMI)	Bioavailable testosterone levels	178782	rs41279738	-0.137353	0.0132447	3.38051e-25
Body mass index (BMI)	Bioavailable testosterone levels	178782	rs4148155	-0.13927	0.0132807	9.94615e-26
Body mass index (BMI)	Bioavailable testosterone levels	178782	rs4261944	-0.13932	0.0132761	9.19602e-26
Body mass index (BMI)	Bioavailable testosterone levels	178782	rs4267103	-0.138995	0.0132784	1.21516e-25
Body mass index (BMI)	Bioavailable testosterone levels	178782	rs4284600	-0.138811	0.0132752	1.36972e-25
Body mass index (BMI)	Bioavailable testosterone levels	178782	rs429343	-0.138408	0.0132762	1.90201e-25
Body mass index (BMI)	Bioavailable testosterone levels	178782	rs429358	-0.141027	0.0131923	1.13299e-26
Body mass index (BMI)	Bioavailable testosterone levels	178782	rs4307239	-0.138158	0.0132296	1.5754e-25
Body mass index (BMI)	Bioavailable testosterone levels	178782	rs4419475	-0.138993	0.0132773	1.2057e-25
Body mass index (BMI)	Bioavailable testosterone levels	178782	rs4444317	-0.139464	0.0132703	7.81171e-26
Body mass index (BMI)	Bioavailable testosterone levels	178782	rs4456769	-0.138463	0.0132656	1.66744e-25
Body mass index (BMI)	Bioavailable testosterone levels	178782	rs4477562	-0.139786	0.0132807	6.59282e-26
Body mass index (BMI)	Bioavailable testosterone levels	178782	rs4482463	-0.139412	0.0132822	8.99474e-26
Body mass index (BMI)	Bioavailable testosterone levels	178782	rs45486197	-0.138171	0.0132361	1.64641e-25
Body mass index (BMI)	Bioavailable testosterone levels	178782	rs4648450	-0.138708	0.0132788	1.53083e-25
Body mass index (BMI)	Bioavailable testosterone levels	178782	rs4672338	-0.139232	0.0132775	9.98611e-26
Body mass index (BMI)	Bioavailable testosterone levels	178782	rs4722398	-0.139185	0.0132785	1.04573e-25
Body mass index (BMI)	Bioavailable testosterone levels	178782	rs4764949	-0.138658	0.0132842	1.66626e-25
Body mass index (BMI)	Bioavailable testosterone levels	178782	rs4790292	-0.137969	0.0132593	2.34147e-25
Body mass index (BMI)	Bioavailable testosterone levels	178782	rs4820410	-0.138092	0.0132587	2.1148e-25
Body mass index (BMI)	Bioavailable testosterone levels	178782	rs4832298	-0.138976	0.0132835	1.286e-25
Body mass index (BMI)	Bioavailable testosterone levels	178782	rs4876611	-0.138736	0.0132872	1.60563e-25
Body mass index (BMI)	Bioavailable testosterone levels	178782	rs5011579	-0.139062	0.0132795	1.16172e-25
Body mass index (BMI)	Bioavailable testosterone levels	178782	rs512121	-0.139232	0.0132767	9.91728e-26
Body mass index (BMI)	Bioavailable testosterone levels	178782	rs529200	-0.138596	0.0132816	1.71316e-25
Body mass index (BMI)	Bioavailable testosterone levels	178782	rs539515	-0.138396	0.013374	4.26595e-25
Body mass index (BMI)	Bioavailable testosterone levels	178782	rs55714539	-0.139593	0.0132761	7.39769e-26
Body mass index (BMI)	Bioavailable testosterone levels	178782	rs55726687	-0.140267	0.0132611	3.79838e-26
Body mass index (BMI)	Bioavailable testosterone levels	178782	rs55769038	-0.138905	0.013285	1.37891e-25
Body mass index (BMI)	Bioavailable testosterone levels	178782	rs558887	-0.139117	0.0132779	1.09823e-25
Body mass index (BMI)	Bioavailable testosterone levels	178782	rs559231	-0.139155	0.0132795	1.07918e-25
Body mass index (BMI)	Bioavailable testosterone levels	178782	rs56038322	-0.139569	0.013263	6.75603e-26
Body mass index (BMI)	Bioavailable testosterone levels	178782	rs56094641	-0.13514	0.0135992	2.86257e-23
Body mass index (BMI)	Bioavailable testosterone levels	178782	rs56133507	-0.138937	0.0132763	1.25013e-25
Body mass index (BMI)	Bioavailable testosterone levels	178782	rs56143236	-0.13999	0.0132054	2.95114e-26
Body mass index (BMI)	Bioavailable testosterone levels	178782	rs56161855	-0.140776	0.0131596	1.04466e-26
Body mass index (BMI)	Bioavailable testosterone levels	178782	rs56203622	-0.139512	0.0132658	7.23878e-26
Body mass index (BMI)	Bioavailable testosterone levels	178782	rs56352336	-0.138304	0.013242	1.55566e-25
Body mass index (BMI)	Bioavailable testosterone levels	178782	rs56399737	-0.138549	0.0132774	1.71722e-25
Body mass index (BMI)	Bioavailable testosterone levels	178782	rs56858768	-0.138639	0.0132761	1.58136e-25
Body mass index (BMI)	Bioavailable testosterone levels	178782	rs56893062	-0.139036	0.0132778	1.16943e-25
Body mass index (BMI)	Bioavailable testosterone levels	178782	rs56930105	-0.138608	0.0132626	1.44932e-25
Body mass index (BMI)	Bioavailable testosterone levels	178782	rs57636386	-0.139732	0.0132949	7.75049e-26
Body mass index (BMI)	Bioavailable testosterone levels	178782	rs57989773	-0.139001	0.0132771	1.19664e-25
Body mass index (BMI)	Bioavailable testosterone levels	178782	rs58862095	-0.138013	0.013284	2.76978e-25
Body mass index (BMI)	Bioavailable testosterone levels	178782	rs59068084	-0.138717	0.0132691	1.40205e-25
Body mass index (BMI)	Bioavailable testosterone levels	178782	rs59227842	-0.140772	0.0132341	2.00401e-26
Body mass index (BMI)	Bioavailable testosterone levels	178782	rs594024	-0.139219	0.0132815	1.04316e-25
Body mass index (BMI)	Bioavailable testosterone levels	178782	rs6023655	-0.139357	0.0132726	8.67182e-26
Body mass index (BMI)	Bioavailable testosterone levels	178782	rs60764613	-0.13892	0.0132828	1.33837e-25
Body mass index (BMI)	Bioavailable testosterone levels	178782	rs61740466	-0.138449	0.0132538	1.52863e-25
Body mass index (BMI)	Bioavailable testosterone levels	178782	rs61813324	-0.138217	0.0132785	2.25499e-25
Body mass index (BMI)	Bioavailable testosterone levels	178782	rs61828641	-0.139539	0.0132694	7.30179e-26
Body mass index (BMI)	Bioavailable testosterone levels	178782	rs61871615	-0.139052	0.0132832	1.20887e-25
Body mass index (BMI)	Bioavailable testosterone levels	178782	rs61903695	-0.139398	0.0132768	8.6955e-26
Body mass index (BMI)	Bioavailable testosterone levels	178782	rs61992671	-0.138989	0.0132847	1.28699e-25
Body mass index (BMI)	Bioavailable testosterone levels	178782	rs62007782	-0.138991	0.0132832	1.26834e-25
Body mass index (BMI)	Bioavailable testosterone levels	178782	rs62020775	-0.140029	0.0132058	2.86807e-26
Body mass index (BMI)	Bioavailable testosterone levels	178782	rs62072006	-0.139828	0.0132273	4.05219e-26
Body mass index (BMI)	Bioavailable testosterone levels	178782	rs62107261	-0.138709	0.0133685	3.19399e-25
Body mass index (BMI)	Bioavailable testosterone levels	178782	rs62176243	-0.138249	0.0132459	1.67903e-25
Body mass index (BMI)	Bioavailable testosterone levels	178782	rs62190049	-0.139328	0.0132695	8.64793e-26
Body mass index (BMI)	Bioavailable testosterone levels	178782	rs62241847	-0.13928	0.0132734	9.28527e-26
Body mass index (BMI)	Bioavailable testosterone levels	178782	rs62246311	-0.138877	0.0132781	1.33072e-25
Body mass index (BMI)	Bioavailable testosterone levels	178782	rs62379271	-0.139246	0.0132744	9.62486e-26
Body mass index (BMI)	Bioavailable testosterone levels	178782	rs62407562	-0.139592	0.0132617	6.56106e-26
Body mass index (BMI)	Bioavailable testosterone levels	178782	rs6265	-0.138981	0.0133339	1.94468e-25
Body mass index (BMI)	Bioavailable testosterone levels	178782	rs6430068	-0.139348	0.0132705	8.58535e-26
Body mass index (BMI)	Bioavailable testosterone levels	178782	rs6444950	-0.139211	0.0132793	1.03061e-25
Body mass index (BMI)	Bioavailable testosterone levels	178782	rs6545714	-0.139602	0.0132881	8.12198e-26
Body mass index (BMI)	Bioavailable testosterone levels	178782	rs6560906	-0.138305	0.0132387	1.51215e-25
Body mass index (BMI)	Bioavailable testosterone levels	178782	rs6561937	-0.138944	0.0132811	1.29348e-25
Body mass index (BMI)	Bioavailable testosterone levels	178782	rs6567160	-0.142704	0.0133476	1.11711e-26
Body mass index (BMI)	Bioavailable testosterone levels	178782	rs6575340	-0.138035	0.0132717	2.46232e-25
Body mass index (BMI)	Bioavailable testosterone levels	178782	rs66679256	-0.138185	0.0132529	1.87011e-25
Body mass index (BMI)	Bioavailable testosterone levels	178782	rs6669341	-0.137795	0.013237	2.23622e-25
Body mass index (BMI)	Bioavailable testosterone levels	178782	rs6682438	-0.138564	0.0132658	1.54076e-25
Body mass index (BMI)	Bioavailable testosterone levels	178782	rs6705567	-0.139561	0.0132687	7.13722e-26
Body mass index (BMI)	Bioavailable testosterone levels	178782	rs6707827	-0.139718	0.0132388	4.88229e-26
Body mass index (BMI)	Bioavailable testosterone levels	178782	rs6710091	-0.139368	0.0132686	8.31764e-26
Body mass index (BMI)	Bioavailable testosterone levels	178782	rs6713781	-0.1389	0.0132796	1.32325e-25
Body mass index (BMI)	Bioavailable testosterone levels	178782	rs6725931	-0.139706	0.0132582	5.80877e-26
Body mass index (BMI)	Bioavailable testosterone levels	178782	rs6744646	-0.137447	0.0133725	8.82667e-25
Body mass index (BMI)	Bioavailable testosterone levels	178782	rs6752979	-0.137941	0.0131957	1.4116e-25
Body mass index (BMI)	Bioavailable testosterone levels	178782	rs6769617	-0.138592	0.0132691	1.54835e-25
Body mass index (BMI)	Bioavailable testosterone levels	178782	rs6774894	-0.139187	0.0132783	1.04198e-25
Body mass index (BMI)	Bioavailable testosterone levels	178782	rs6777784	-0.138951	0.013277	1.2439e-25
Body mass index (BMI)	Bioavailable testosterone levels	178782	rs6831088	-0.139312	0.0132709	8.86223e-26
Body mass index (BMI)	Bioavailable testosterone levels	178782	rs6843852	-0.138301	0.0132512	1.68301e-25
Body mass index (BMI)	Bioavailable testosterone levels	178782	rs6909685	-0.138837	0.0132795	1.38973e-25
Body mass index (BMI)	Bioavailable testosterone levels	178782	rs6922607	-0.139125	0.0132774	1.08628e-25
Body mass index (BMI)	Bioavailable testosterone levels	178782	rs6938973	-0.139424	0.0132854	9.15339e-26
Body mass index (BMI)	Bioavailable testosterone levels	178782	rs6950388	-0.139346	0.0132732	8.79669e-26
Body mass index (BMI)	Bioavailable testosterone levels	178782	rs6962980	-0.138184	0.0132589	1.96882e-25
Body mass index (BMI)	Bioavailable testosterone levels	178782	rs698147	-0.138905	0.0132789	1.31014e-25
Body mass index (BMI)	Bioavailable testosterone levels	178782	rs7027304	-0.139374	0.0132757	8.78801e-26
Body mass index (BMI)	Bioavailable testosterone levels	178782	rs7034554	-0.138907	0.0132785	1.30467e-25
Body mass index (BMI)	Bioavailable testosterone levels	178782	rs7038943	-0.138697	0.0132748	1.49328e-25
Body mass index (BMI)	Bioavailable testosterone levels	178782	rs704061	-0.139579	0.0132697	7.08909e-26
Body mass index (BMI)	Bioavailable testosterone levels	178782	rs7070670	-0.139039	0.0132778	1.16728e-25
Body mass index (BMI)	Bioavailable testosterone levels	178782	rs7081254	-0.139457	0.0132648	7.50087e-26
Body mass index (BMI)	Bioavailable testosterone levels	178782	rs7124681	-0.139475	0.0133086	1.06611e-25
Body mass index (BMI)	Bioavailable testosterone levels	178782	rs7132908	-0.138358	0.0133198	2.83195e-25
Body mass index (BMI)	Bioavailable testosterone levels	178782	rs71495038	-0.139576	0.0132707	7.16372e-26
Body mass index (BMI)	Bioavailable testosterone levels	178782	rs7201895	-0.138857	0.013281	1.38594e-25
Body mass index (BMI)	Bioavailable testosterone levels	178782	rs7206608	-0.13952	0.0132652	7.15428e-26
Body mass index (BMI)	Bioavailable testosterone levels	178782	rs7218014	-0.13744	0.0131786	1.82691e-25
Body mass index (BMI)	Bioavailable testosterone levels	178782	rs7232171	-0.138444	0.013257	1.57596e-25
Body mass index (BMI)	Bioavailable testosterone levels	178782	rs723672	-0.139109	0.0132764	1.09141e-25
Body mass index (BMI)	Bioavailable testosterone levels	178782	rs7250833	-0.139366	0.0132716	8.54452e-26
Body mass index (BMI)	Bioavailable testosterone levels	178782	rs7259070	-0.138212	0.013285	2.3863e-25
Body mass index (BMI)	Bioavailable testosterone levels	178782	rs72634826	-0.13932	0.013289	1.02488e-25
Body mass index (BMI)	Bioavailable testosterone levels	178782	rs72649373	-0.1387	0.013272	1.45651e-25
Body mass index (BMI)	Bioavailable testosterone levels	178782	rs72673947	-0.138582	0.0132705	1.57933e-25
Body mass index (BMI)	Bioavailable testosterone levels	178782	rs72892910	-0.137886	0.0133115	3.8314e-25
Body mass index (BMI)	Bioavailable testosterone levels	178782	rs72976986	-0.139723	0.0132766	6.69664e-26
Body mass index (BMI)	Bioavailable testosterone levels	178782	rs73026725	-0.138841	0.0132849	1.44929e-25
Body mass index (BMI)	Bioavailable testosterone levels	178782	rs73052033	-0.141254	0.0132217	1.21548e-26
Body mass index (BMI)	Bioavailable testosterone levels	178782	rs73124396	-0.139161	0.0132781	1.06257e-25
Body mass index (BMI)	Bioavailable testosterone levels	178782	rs73142879	-0.139071	0.013298	1.3463e-25
Body mass index (BMI)	Bioavailable testosterone levels	178782	rs73193736	-0.139116	0.0132838	1.15389e-25
Body mass index (BMI)	Bioavailable testosterone levels	178782	rs73213484	-0.13874	0.013282	1.53281e-25
Body mass index (BMI)	Bioavailable testosterone levels	178782	rs7331420	-0.13864	0.0132715	1.52083e-25
Body mass index (BMI)	Bioavailable testosterone levels	178782	rs7357754	-0.138825	0.0132801	1.41019e-25
Body mass index (BMI)	Bioavailable testosterone levels	178782	rs73601548	-0.138803	0.0132735	1.35917e-25
Body mass index (BMI)	Bioavailable testosterone levels	178782	rs73985439	-0.139007	0.0132795	1.21396e-25
Body mass index (BMI)	Bioavailable testosterone levels	178782	rs7442885	-0.1374	0.0132193	2.64257e-25
Body mass index (BMI)	Bioavailable testosterone levels	178782	rs745249	-0.138882	0.0132848	1.40203e-25
Body mass index (BMI)	Bioavailable testosterone levels	178782	rs74750282	-0.139188	0.0132751	1.01311e-25
Body mass index (BMI)	Bioavailable testosterone levels	178782	rs7516554	-0.139244	0.013275	9.68566e-26
Body mass index (BMI)	Bioavailable testosterone levels	178782	rs7519259	-0.139195	0.0132805	1.05485e-25
Body mass index (BMI)	Bioavailable testosterone levels	178782	rs754635	-0.139313	0.0132779	9.39337e-26
Body mass index (BMI)	Bioavailable testosterone levels	178782	rs75499503	-0.140466	0.0131931	1.80193e-26
Body mass index (BMI)	Bioavailable testosterone levels	178782	rs7571496	-0.139023	0.0132818	1.22185e-25
Body mass index (BMI)	Bioavailable testosterone levels	178782	rs76183894	-0.139109	0.0132779	1.10417e-25
Body mass index (BMI)	Bioavailable testosterone levels	178782	rs7619139	-0.139231	0.0132783	1.00631e-25
Body mass index (BMI)	Bioavailable testosterone levels	178782	rs76702514	-0.139478	0.0132702	7.71798e-26
Body mass index (BMI)	Bioavailable testosterone levels	178782	rs7683836	-0.138846	0.0132766	1.34788e-25
Body mass index (BMI)	Bioavailable testosterone levels	178782	rs7708584	-0.138966	0.0132853	1.31694e-25
Body mass index (BMI)	Bioavailable testosterone levels	178782	rs7761673	-0.138728	0.0132706	1.40824e-25
Body mass index (BMI)	Bioavailable testosterone levels	178782	rs7762794	-0.137691	0.0131881	1.61808e-25
Body mass index (BMI)	Bioavailable testosterone levels	178782	rs7774	-0.139579	0.0132665	6.90475e-26
Body mass index (BMI)	Bioavailable testosterone levels	178782	rs7776021	-0.138822	0.0132741	1.34477e-25
Body mass index (BMI)	Bioavailable testosterone levels	178782	rs7802342	-0.139102	0.0132768	1.10087e-25
Body mass index (BMI)	Bioavailable testosterone levels	178782	rs7805441	-0.139386	0.0132739	8.56568e-26
Body mass index (BMI)	Bioavailable testosterone levels	178782	rs78086698	-0.138665	0.0132713	1.48813e-25
Body mass index (BMI)	Bioavailable testosterone levels	178782	rs784257	-0.140542	0.0131695	1.38043e-26
Body mass index (BMI)	Bioavailable testosterone levels	178782	rs78605811	-0.139522	0.0132719	7.55864e-26
Body mass index (BMI)	Bioavailable testosterone levels	178782	rs7893571	-0.139032	0.0132806	1.20188e-25
Body mass index (BMI)	Bioavailable testosterone levels	178782	rs7924036	-0.139563	0.0132694	7.16232e-26
Body mass index (BMI)	Bioavailable testosterone levels	178782	rs7925100	-0.139312	0.0132791	9.50005e-26
Body mass index (BMI)	Bioavailable testosterone levels	178782	rs7944782	-0.138907	0.0132847	1.37297e-25
Body mass index (BMI)	Bioavailable testosterone levels	178782	rs7947143	-0.139066	0.0132811	1.17375e-25
Body mass index (BMI)	Bioavailable testosterone levels	178782	rs79780963	-0.139672	0.0132552	5.82472e-26
Body mass index (BMI)	Bioavailable testosterone levels	178782	rs7996639	-0.138524	0.0132711	1.6622e-25
Body mass index (BMI)	Bioavailable testosterone levels	178782	rs80135274	-0.13957	0.0132535	6.23227e-26
Body mass index (BMI)	Bioavailable testosterone levels	178782	rs8015400	-0.140999	0.0132029	1.27068e-26
Body mass index (BMI)	Bioavailable testosterone levels	178782	rs8020365	-0.140332	0.0132602	3.57548e-26
Body mass index (BMI)	Bioavailable testosterone levels	178782	rs8024137	-0.139132	0.0132765	1.07251e-25
Body mass index (BMI)	Bioavailable testosterone levels	178782	rs8025516	-0.139248	0.0132796	1.00347e-25
Body mass index (BMI)	Bioavailable testosterone levels	178782	rs8076669	-0.13899	0.0132818	1.25516e-25
Body mass index (BMI)	Bioavailable testosterone levels	178782	rs8089514	-0.139545	0.0132628	6.87605e-26
Body mass index (BMI)	Bioavailable testosterone levels	178782	rs8112818	-0.140784	0.0132246	1.82846e-26
Body mass index (BMI)	Bioavailable testosterone levels	178782	rs8132491	-0.138877	0.0132806	1.35855e-25
Body mass index (BMI)	Bioavailable testosterone levels	178782	rs815163	-0.13926	0.0132849	1.03804e-25
Body mass index (BMI)	Bioavailable testosterone levels	178782	rs852042	-0.138263	0.0132333	1.49443e-25
Body mass index (BMI)	Bioavailable testosterone levels	178782	rs862320	-0.138995	0.0133033	1.49335e-25
Body mass index (BMI)	Bioavailable testosterone levels	178782	rs879620	-0.137783	0.0132785	3.17381e-25
Body mass index (BMI)	Bioavailable testosterone levels	178782	rs909892	-0.13821	0.0132385	1.6275e-25
Body mass index (BMI)	Bioavailable testosterone levels	178782	rs923994	-0.138302	0.0132438	1.58088e-25
Body mass index (BMI)	Bioavailable testosterone levels	178782	rs9291822	-0.13926	0.0132796	9.9344e-26
Body mass index (BMI)	Bioavailable testosterone levels	178782	rs9294260	-0.13869	0.0132783	1.54596e-25
Body mass index (BMI)	Bioavailable testosterone levels	178782	rs9349235	-0.138807	0.0132732	1.35126e-25
Body mass index (BMI)	Bioavailable testosterone levels	178782	rs935166	-0.138169	0.0132594	2.00004e-25
Body mass index (BMI)	Bioavailable testosterone levels	178782	rs9463175	-0.138376	0.0132423	1.47137e-25
Body mass index (BMI)	Bioavailable testosterone levels	178782	rs9478496	-0.138227	0.0132476	1.73175e-25
Body mass index (BMI)	Bioavailable testosterone levels	178782	rs9515446	-0.139397	0.0132782	8.804e-26
Body mass index (BMI)	Bioavailable testosterone levels	178782	rs9522180	-0.138796	0.0132793	1.43393e-25
Body mass index (BMI)	Bioavailable testosterone levels	178782	rs9571687	-0.139463	0.0132686	7.70409e-26
Body mass index (BMI)	Bioavailable testosterone levels	178782	rs9638713	-0.13946	0.0132632	7.3868e-26
Body mass index (BMI)	Bioavailable testosterone levels	178782	rs9673839	-0.138447	0.0132611	1.62754e-25
Body mass index (BMI)	Bioavailable testosterone levels	178782	rs9674487	-0.138916	0.0132756	1.26448e-25
Body mass index (BMI)	Bioavailable testosterone levels	178782	rs9830592	-0.139429	0.013278	8.57124e-26
Body mass index (BMI)	Bioavailable testosterone levels	178782	rs9839081	-0.13915	0.0132755	1.04879e-25
Body mass index (BMI)	Bioavailable testosterone levels	178782	rs9876664	-0.139515	0.0132817	8.25228e-26
Body mass index (BMI)	Bioavailable testosterone levels	178782	rs9888533	-0.139101	0.0132778	1.11082e-25
Body mass index (BMI)	Bioavailable testosterone levels	178782	rs9926784	-0.137206	0.0131991	2.61162e-25
Body mass index (BMI)	Bioavailable testosterone levels	178782	rs9951619	-0.139185	0.013277	1.03225e-25
Body mass index (BMI)	Bioavailable testosterone levels	178782	All	-0.139029	0.0132526	9.53554e-26

## Sheet: Table S12
Supplementary Table S12: Leave one out analysis for the effect of BMI on estradiol level.
Exposure	Outcome	Samplesize	SNP	beta	se	p
Body mass index (BMI)	Estradiol levels	206927	rs10063055	0.013915	0.00269666	2.46851e-07
Body mass index (BMI)	Estradiol levels	206927	rs10099330	0.0137174	0.00268046	3.09509e-07
Body mass index (BMI)	Estradiol levels	206927	rs10160769	0.0140369	0.00269522	1.90823e-07
Body mass index (BMI)	Estradiol levels	206927	rs10169594	0.0139629	0.00269699	2.25235e-07
Body mass index (BMI)	Estradiol levels	206927	rs10182416	0.0140601	0.00269425	1.80344e-07
Body mass index (BMI)	Estradiol levels	206927	rs10423928	0.0138588	0.0027041	2.97337e-07
Body mass index (BMI)	Estradiol levels	206927	rs10505836	0.0138697	0.00269538	2.66472e-07
Body mass index (BMI)	Estradiol levels	206927	rs10510025	0.0140436	0.0026965	1.90792e-07
Body mass index (BMI)	Estradiol levels	206927	rs1064213	0.014049	0.00269618	1.88132e-07
Body mass index (BMI)	Estradiol levels	206927	rs10742752	0.0140161	0.00269552	1.99541e-07
Body mass index (BMI)	Estradiol levels	206927	rs10756714	0.0138968	0.00270042	2.65867e-07
Body mass index (BMI)	Estradiol levels	206927	rs10756792	0.0141997	0.00268841	1.27906e-07
Body mass index (BMI)	Estradiol levels	206927	rs10760277	0.0139424	0.00269758	2.36004e-07
Body mass index (BMI)	Estradiol levels	206927	rs10780248	0.0140131	0.00269593	2.01599e-07
Body mass index (BMI)	Estradiol levels	206927	rs1078141	0.0141522	0.00268775	1.39841e-07
Body mass index (BMI)	Estradiol levels	206927	rs10799778	0.0140138	0.00269667	2.02835e-07
Body mass index (BMI)	Estradiol levels	206927	rs10809621	0.0139749	0.00269694	2.19789e-07
Body mass index (BMI)	Estradiol levels	206927	rs10824211	0.0142233	0.00268111	1.12668e-07
Body mass index (BMI)	Estradiol levels	206927	rs10832778	0.0138075	0.00268918	2.82937e-07
Body mass index (BMI)	Estradiol levels	206927	rs10927006	0.0139356	0.00269697	2.37716e-07
Body mass index (BMI)	Estradiol levels	206927	rs10965698	0.0140255	0.00269464	1.94026e-07
Body mass index (BMI)	Estradiol levels	206927	rs10989067	0.0140516	0.00269658	1.87934e-07
Body mass index (BMI)	Estradiol levels	206927	rs11001963	0.0140139	0.00269559	2.00527e-07
Body mass index (BMI)	Estradiol levels	206927	rs11009685	0.0139442	0.00269685	2.33403e-07
Body mass index (BMI)	Estradiol levels	206927	rs11012732	0.0136912	0.00269295	3.69417e-07
Body mass index (BMI)	Estradiol levels	206927	rs11079849	0.0141492	0.00269474	1.51546e-07
Body mass index (BMI)	Estradiol levels	206927	rs11099020	0.0141543	0.00268733	1.38635e-07
Body mass index (BMI)	Estradiol levels	206927	rs11115160	0.0140516	0.00269307	1.81165e-07
Body mass index (BMI)	Estradiol levels	206927	rs11122450	0.013976	0.00269671	2.18786e-07
Body mass index (BMI)	Estradiol levels	206927	rs11134679	0.0139448	0.00269896	2.38214e-07
Body mass index (BMI)	Estradiol levels	206927	rs11150745	0.0139882	0.00270013	2.21226e-07
Body mass index (BMI)	Estradiol levels	206927	rs111598585	0.0139508	0.00269697	2.30655e-07
Body mass index (BMI)	Estradiol levels	206927	rs11165643	0.0138776	0.0026992	2.72723e-07
Body mass index (BMI)	Estradiol levels	206927	rs111689389	0.0138607	0.00269468	2.69311e-07
Body mass index (BMI)	Estradiol levels	206927	rs11218510	0.0139095	0.00269744	2.51506e-07
Body mass index (BMI)	Estradiol levels	206927	rs1126930	0.0140386	0.0026947	1.89135e-07
Body mass index (BMI)	Estradiol levels	206927	rs113079574	0.0138834	0.00269573	2.60308e-07
Body mass index (BMI)	Estradiol levels	206927	rs113603865	0.0138183	0.00269456	2.92513e-07
Body mass index (BMI)	Estradiol levels	206927	rs113624107	0.0139167	0.00269695	2.46718e-07
Body mass index (BMI)	Estradiol levels	206927	rs11525873	0.0140085	0.00269716	2.0604e-07
Body mass index (BMI)	Estradiol levels	206927	rs11607476	0.0139809	0.00269824	2.20114e-07
Body mass index (BMI)	Estradiol levels	206927	rs11610621	0.0140623	0.00269289	1.77009e-07
Body mass index (BMI)	Estradiol levels	206927	rs11630647	0.0139247	0.00269655	2.41847e-07
Body mass index (BMI)	Estradiol levels	206927	rs116374395	0.0138637	0.00269442	2.67044e-07
Body mass index (BMI)	Estradiol levels	206927	rs11642090	0.0140712	0.00269132	1.71003e-07
Body mass index (BMI)	Estradiol levels	206927	rs11656076	0.0138278	0.00269308	2.82813e-07
Body mass index (BMI)	Estradiol levels	206927	rs1167311	0.0137394	0.00269276	3.35458e-07
Body mass index (BMI)	Estradiol levels	206927	rs11675464	0.0138653	0.00269463	2.66774e-07
Body mass index (BMI)	Estradiol levels	206927	rs11691869	0.0139983	0.0026994	2.15201e-07
Body mass index (BMI)	Estradiol levels	206927	rs11699828	0.0137202	0.00267801	3.00266e-07
Body mass index (BMI)	Estradiol levels	206927	rs11709402	0.0141013	0.00269812	1.7291e-07
Body mass index (BMI)	Estradiol levels	206927	rs117118217	0.0138955	0.00269575	2.54207e-07
Body mass index (BMI)	Estradiol levels	206927	rs117342986	0.0141751	0.00267837	1.20705e-07
Body mass index (BMI)	Estradiol levels	206927	rs11757278	0.0138713	0.00269593	2.67151e-07
Body mass index (BMI)	Estradiol levels	206927	rs11778219	0.0139254	0.00269678	2.42089e-07
Body mass index (BMI)	Estradiol levels	206927	rs118136827	0.0139448	0.00269708	2.33668e-07
Body mass index (BMI)	Estradiol levels	206927	rs11919665	0.0137904	0.00268862	2.91044e-07
Body mass index (BMI)	Estradiol levels	206927	rs12001437	0.0140369	0.0026946	1.8957e-07
Body mass index (BMI)	Estradiol levels	206927	rs12072739	0.0138596	0.00269518	2.71305e-07
Body mass index (BMI)	Estradiol levels	206927	rs12088284	0.0141434	0.00268698	1.41205e-07
Body mass index (BMI)	Estradiol levels	206927	rs12089815	0.0139988	0.00269651	2.0865e-07
Body mass index (BMI)	Estradiol levels	206927	rs12140153	0.0138657	0.00269899	2.78618e-07
Body mass index (BMI)	Estradiol levels	206927	rs12149660	0.0140408	0.0026962	1.91279e-07
Body mass index (BMI)	Estradiol levels	206927	rs12259464	0.0139831	0.00269718	2.1679e-07
Body mass index (BMI)	Estradiol levels	206927	rs12273545	0.0138511	0.00269329	2.70634e-07
Body mass index (BMI)	Estradiol levels	206927	rs1229984	0.013693	0.00267292	3.0092e-07
Body mass index (BMI)	Estradiol levels	206927	rs12364470	0.0137291	0.00268667	3.22019e-07
Body mass index (BMI)	Estradiol levels	206927	rs12440603	0.0140438	0.00269565	1.89063e-07
Body mass index (BMI)	Estradiol levels	206927	rs12459368	0.014081	0.0026948	1.73933e-07
Body mass index (BMI)	Estradiol levels	206927	rs12462975	0.0141136	0.00269598	1.64952e-07
Body mass index (BMI)	Estradiol levels	206927	rs12541408	0.0139703	0.00269746	2.22998e-07
Body mass index (BMI)	Estradiol levels	206927	rs1266874	0.0139824	0.00269735	2.17453e-07
Body mass index (BMI)	Estradiol levels	206927	rs12681792	0.0138545	0.00269383	2.70325e-07
Body mass index (BMI)	Estradiol levels	206927	rs12692596	0.0138901	0.00269622	2.58161e-07
Body mass index (BMI)	Estradiol levels	206927	rs12696039	0.0139592	0.00269678	2.26369e-07
Body mass index (BMI)	Estradiol levels	206927	rs1286058	0.0138771	0.00269625	2.64932e-07
Body mass index (BMI)	Estradiol levels	206927	rs12881629	0.0139974	0.0026965	2.09244e-07
Body mass index (BMI)	Estradiol levels	206927	rs12921986	0.0139661	0.00269672	2.23149e-07
Body mass index (BMI)	Estradiol levels	206927	rs12937411	0.0139138	0.00269871	2.52629e-07
Body mass index (BMI)	Estradiol levels	206927	rs1296328	0.0141031	0.00269671	1.69743e-07
Body mass index (BMI)	Estradiol levels	206927	rs12974458	0.0142754	0.00267686	9.66728e-08
Body mass index (BMI)	Estradiol levels	206927	rs13012070	0.0139491	0.00269695	2.31379e-07
Body mass index (BMI)	Estradiol levels	206927	rs13033310	0.0139593	0.00269678	2.26318e-07
Body mass index (BMI)	Estradiol levels	206927	rs13097918	0.0139778	0.00269686	2.18361e-07
Body mass index (BMI)	Estradiol levels	206927	rs13107325	0.0140127	0.00270315	2.17387e-07
Body mass index (BMI)	Estradiol levels	206927	rs13176429	0.0139572	0.00269748	2.28935e-07
Body mass index (BMI)	Estradiol levels	206927	rs1320251	0.0140476	0.00269807	1.92391e-07
Body mass index (BMI)	Estradiol levels	206927	rs13218383	0.0138552	0.0026953	2.73996e-07
Body mass index (BMI)	Estradiol levels	206927	rs1322842	0.0139263	0.00269718	2.42664e-07
Body mass index (BMI)	Estradiol levels	206927	rs13248187	0.0140282	0.00269637	1.9649e-07
Body mass index (BMI)	Estradiol levels	206927	rs1327259	0.0139381	0.00269789	2.38784e-07
Body mass index (BMI)	Estradiol levels	206927	rs13291723	0.0139385	0.00269673	2.35774e-07
Body mass index (BMI)	Estradiol levels	206927	rs1330199	0.0138802	0.0026953	2.60801e-07
Body mass index (BMI)	Estradiol levels	206927	rs13420048	0.0140804	0.00269461	1.73791e-07
Body mass index (BMI)	Estradiol levels	206927	rs13427822	0.0140143	0.00269785	2.05131e-07
Body mass index (BMI)	Estradiol levels	206927	rs1346841	0.0136984	0.00267894	3.16494e-07
Body mass index (BMI)	Estradiol levels	206927	rs1360201	0.0138492	0.00269457	2.75182e-07
Body mass index (BMI)	Estradiol levels	206927	rs13642	0.0141319	0.0026921	1.5258e-07
Body mass index (BMI)	Estradiol levels	206927	rs140159717	0.0140306	0.00269587	1.94528e-07
Body mass index (BMI)	Estradiol levels	206927	rs1438945	0.014074	0.00269234	1.7189e-07
Body mass index (BMI)	Estradiol levels	206927	rs1441264	0.0138094	0.00269591	3.01748e-07
Body mass index (BMI)	Estradiol levels	206927	rs1451963	0.0139651	0.00269712	2.24557e-07
Body mass index (BMI)	Estradiol levels	206927	rs1458156	0.0141364	0.0026898	1.4758e-07
Body mass index (BMI)	Estradiol levels	206927	rs145981104	0.0139102	0.0026962	2.4804e-07
Body mass index (BMI)	Estradiol levels	206927	rs146569428	0.013916	0.00269638	2.45614e-07
Body mass index (BMI)	Estradiol levels	206927	rs1471093	0.0138635	0.00269531	2.69611e-07
Body mass index (BMI)	Estradiol levels	206927	rs1471740	0.0137737	0.00269383	3.16981e-07
Body mass index (BMI)	Estradiol levels	206927	rs147568678	0.0139841	0.00269654	2.14934e-07
Body mass index (BMI)	Estradiol levels	206927	rs1477290	0.0137669	0.00269911	3.3873e-07
Body mass index (BMI)	Estradiol levels	206927	rs147730268	0.0140724	0.00269834	1.83637e-07
Body mass index (BMI)	Estradiol levels	206927	rs1503526	0.0138885	0.00269755	2.62495e-07
Body mass index (BMI)	Estradiol levels	206927	rs156201	0.0140779	0.00269121	1.68514e-07
Body mass index (BMI)	Estradiol levels	206927	rs156914	0.0139611	0.00269684	2.25655e-07
Body mass index (BMI)	Estradiol levels	206927	rs1582931	0.0139494	0.00269752	2.3259e-07
Body mass index (BMI)	Estradiol levels	206927	rs1608113	0.0138773	0.00269491	2.61232e-07
Body mass index (BMI)	Estradiol levels	206927	rs1609010	0.0140308	0.00270018	2.03367e-07
Body mass index (BMI)	Estradiol levels	206927	rs16916303	0.0139652	0.00269718	2.24625e-07
Body mass index (BMI)	Estradiol levels	206927	rs17056301	0.0139095	0.00269647	2.49065e-07
Body mass index (BMI)	Estradiol levels	206927	rs17132130	0.0138877	0.00269718	2.61929e-07
Body mass index (BMI)	Estradiol levels	206927	rs17149254	0.014013	0.00269809	2.06178e-07
Body mass index (BMI)	Estradiol levels	206927	rs17289010	0.0138722	0.00269549	2.65456e-07
Body mass index (BMI)	Estradiol levels	206927	rs17399739	0.013989	0.00269735	2.14614e-07
Body mass index (BMI)	Estradiol levels	206927	rs17446299	0.0138232	0.00269103	2.79475e-07
Body mass index (BMI)	Estradiol levels	206927	rs17544384	0.0140084	0.00269585	2.03306e-07
Body mass index (BMI)	Estradiol levels	206927	rs17668356	0.0140237	0.00269779	2.01194e-07
Body mass index (BMI)	Estradiol levels	206927	rs17770336	0.0142344	0.00269484	1.27714e-07
Body mass index (BMI)	Estradiol levels	206927	rs1778830	0.0138858	0.0026965	2.61064e-07
Body mass index (BMI)	Estradiol levels	206927	rs1788808	0.0138437	0.0026993	2.91851e-07
Body mass index (BMI)	Estradiol levels	206927	rs1793636	0.0138831	0.00269577	2.60535e-07
Body mass index (BMI)	Estradiol levels	206927	rs1805123	0.0138292	0.00269459	2.86339e-07
Body mass index (BMI)	Estradiol levels	206927	rs1834144	0.0140788	0.00269353	1.7239e-07
Body mass index (BMI)	Estradiol levels	206927	rs1861410	0.0139328	0.00270094	2.48955e-07
Body mass index (BMI)	Estradiol levels	206927	rs1884897	0.0137845	0.00269653	3.18871e-07
Body mass index (BMI)	Estradiol levels	206927	rs1919243	0.0140204	0.00269533	1.97437e-07
Body mass index (BMI)	Estradiol levels	206927	rs1967772	0.0141011	0.00269388	1.65435e-07
Body mass index (BMI)	Estradiol levels	206927	rs2035936	0.0139369	0.00269885	2.41694e-07
Body mass index (BMI)	Estradiol levels	206927	rs2051559	0.0139976	0.00269722	2.10718e-07
Body mass index (BMI)	Estradiol levels	206927	rs2075466	0.0138565	0.00269396	2.69589e-07
Body mass index (BMI)	Estradiol levels	206927	rs2102278	0.0138755	0.00269463	2.61424e-07
Body mass index (BMI)	Estradiol levels	206927	rs2133561	0.0140925	0.00269264	1.66138e-07
Body mass index (BMI)	Estradiol levels	206927	rs213518	0.013838	0.00269206	2.74284e-07
Body mass index (BMI)	Estradiol levels	206927	rs2153740	0.0139291	0.00269669	2.40095e-07
Body mass index (BMI)	Estradiol levels	206927	rs215634	0.014177	0.00268781	1.33075e-07
Body mass index (BMI)	Estradiol levels	206927	rs2172131	0.0139662	0.00269802	2.2613e-07
Body mass index (BMI)	Estradiol levels	206927	rs217672	0.0141057	0.00269339	1.63066e-07
Body mass index (BMI)	Estradiol levels	206927	rs2192158	0.0137267	0.00268755	3.26404e-07
Body mass index (BMI)	Estradiol levels	206927	rs2216931	0.0141793	0.00268915	1.34365e-07
Body mass index (BMI)	Estradiol levels	206927	rs2234458	0.0139501	0.00270023	2.38844e-07
Body mass index (BMI)	Estradiol levels	206927	rs2248551	0.0140152	0.00269522	1.99256e-07
Body mass index (BMI)	Estradiol levels	206927	rs2253310	0.0139443	0.00269887	2.38223e-07
Body mass index (BMI)	Estradiol levels	206927	rs2271189	0.0138608	0.00269706	2.75872e-07
Body mass index (BMI)	Estradiol levels	206927	rs2289379	0.0140168	0.00269724	2.02846e-07
Body mass index (BMI)	Estradiol levels	206927	rs2307111	0.0136789	0.0027003	4.0688e-07
Body mass index (BMI)	Estradiol levels	206927	rs2342892	0.0139572	0.00269733	2.28602e-07
Body mass index (BMI)	Estradiol levels	206927	rs2381404	0.0140284	0.00269519	1.94021e-07
Body mass index (BMI)	Estradiol levels	206927	rs2383377	0.0139755	0.00269655	2.18662e-07
Body mass index (BMI)	Estradiol levels	206927	rs2398861	0.0141837	0.00268828	1.31953e-07
Body mass index (BMI)	Estradiol levels	206927	rs2425816	0.0139988	0.00269642	2.0848e-07
Body mass index (BMI)	Estradiol levels	206927	rs2433733	0.013786	0.0026936	3.08697e-07
Body mass index (BMI)	Estradiol levels	206927	rs2439823	0.0141489	0.00269499	1.52034e-07
Body mass index (BMI)	Estradiol levels	206927	rs2482356	0.0139554	0.00269689	2.28343e-07
Body mass index (BMI)	Estradiol levels	206927	rs2512892	0.0140444	0.00269496	1.87467e-07
Body mass index (BMI)	Estradiol levels	206927	rs252761	0.0139927	0.00269629	2.10721e-07
Body mass index (BMI)	Estradiol levels	206927	rs2568958	0.0140323	0.00270081	2.04078e-07
Body mass index (BMI)	Estradiol levels	206927	rs2569993	0.0140149	0.00269573	2.00451e-07
Body mass index (BMI)	Estradiol levels	206927	rs2606228	0.0141788	0.00268362	1.26772e-07
Body mass index (BMI)	Estradiol levels	206927	rs2616143	0.0139769	0.00269725	2.1964e-07
Body mass index (BMI)	Estradiol levels	206927	rs2618039	0.0139413	0.00269775	2.36909e-07
Body mass index (BMI)	Estradiol levels	206927	rs2678204	0.0141736	0.00269768	1.48837e-07
Body mass index (BMI)	Estradiol levels	206927	rs2725371	0.0138962	0.00269739	2.58131e-07
Body mass index (BMI)	Estradiol levels	206927	rs2791643	0.013803	0.00268896	2.8486e-07
Body mass index (BMI)	Estradiol levels	206927	rs28350	0.0137613	0.00268878	3.08731e-07
Body mass index (BMI)	Estradiol levels	206927	rs28366156	0.0141776	0.00269201	1.39012e-07
Body mass index (BMI)	Estradiol levels	206927	rs2837996	0.0140304	0.00269519	1.93257e-07
Body mass index (BMI)	Estradiol levels	206927	rs28404639	0.0138532	0.00269334	2.69675e-07
Body mass index (BMI)	Estradiol levels	206927	rs28489620	0.013914	0.00269739	2.49184e-07
Body mass index (BMI)	Estradiol levels	206927	rs28568418	0.013967	0.00269682	2.23004e-07
Body mass index (BMI)	Estradiol levels	206927	rs2861685	0.0141221	0.00269425	1.59202e-07
Body mass index (BMI)	Estradiol levels	206927	rs28670671	0.0140243	0.00269472	1.9467e-07
Body mass index (BMI)	Estradiol levels	206927	rs2870111	0.0141399	0.00269138	1.49014e-07
Body mass index (BMI)	Estradiol levels	206927	rs2875762	0.0136709	0.00267586	3.23889e-07
Body mass index (BMI)	Estradiol levels	206927	rs2899644	0.0138552	0.00269456	2.7194e-07
Body mass index (BMI)	Estradiol levels	206927	rs2920503	0.0137656	0.00268717	3.01148e-07
Body mass index (BMI)	Estradiol levels	206927	rs2962334	0.0139908	0.00269666	2.12351e-07
Body mass index (BMI)	Estradiol levels	206927	rs317656	0.0138942	0.00269649	2.56788e-07
Body mass index (BMI)	Estradiol levels	206927	rs3213943	0.0138961	0.00269603	2.54611e-07
Body mass index (BMI)	Estradiol levels	206927	rs32421	0.0140456	0.00269343	1.84037e-07
Body mass index (BMI)	Estradiol levels	206927	rs329118	0.0137406	0.00269093	3.28607e-07
Body mass index (BMI)	Estradiol levels	206927	rs329651	0.0139047	0.00269658	2.51704e-07
Body mass index (BMI)	Estradiol levels	206927	rs34045288	0.0139926	0.00270145	2.22281e-07
Body mass index (BMI)	Estradiol levels	206927	rs34153025	0.0139501	0.00269693	2.30897e-07
Body mass index (BMI)	Estradiol levels	206927	rs34234296	0.013712	0.00268511	3.27884e-07
Body mass index (BMI)	Estradiol levels	206927	rs34481751	0.0140668	0.00269435	1.78099e-07
Body mass index (BMI)	Estradiol levels	206927	rs34517439	0.0139825	0.00270339	2.31336e-07
Body mass index (BMI)	Estradiol levels	206927	rs34696181	0.0139223	0.00269663	2.43225e-07
Body mass index (BMI)	Estradiol levels	206927	rs34811474	0.014139	0.00269996	1.63442e-07
Body mass index (BMI)	Estradiol levels	206927	rs349071	0.0141163	0.00269041	1.54678e-07
Body mass index (BMI)	Estradiol levels	206927	rs35154326	0.013923	0.00269669	2.43013e-07
Body mass index (BMI)	Estradiol levels	206927	rs35364449	0.0141754	0.00268506	1.29629e-07
Body mass index (BMI)	Estradiol levels	206927	rs355777	0.0138842	0.00269721	2.63801e-07
Body mass index (BMI)	Estradiol levels	206927	rs35697587	0.0139646	0.00269873	2.2854e-07
Body mass index (BMI)	Estradiol levels	206927	rs35697691	0.0137964	0.00269071	2.93723e-07
Body mass index (BMI)	Estradiol levels	206927	rs35809007	0.0141832	0.00268951	1.33831e-07
Body mass index (BMI)	Estradiol levels	206927	rs35957544	0.0140155	0.00269961	2.08419e-07
Body mass index (BMI)	Estradiol levels	206927	rs36007635	0.0137875	0.00269199	3.02838e-07
Body mass index (BMI)	Estradiol levels	206927	rs36061954	0.0138612	0.0026949	2.697e-07
Body mass index (BMI)	Estradiol levels	206927	rs3764625	0.0140029	0.00269609	2.06053e-07
Body mass index (BMI)	Estradiol levels	206927	rs3784710	0.0140935	0.00270171	1.8233e-07
Body mass index (BMI)	Estradiol levels	206927	rs3803286	0.0137664	0.00269412	3.22528e-07
Body mass index (BMI)	Estradiol levels	206927	rs3807566	0.013953	0.00269711	2.29988e-07
Body mass index (BMI)	Estradiol levels	206927	rs3814883	0.0134272	0.00268028	5.45364e-07
Body mass index (BMI)	Estradiol levels	206927	rs3845344	0.0139603	0.00269855	2.30059e-07
Body mass index (BMI)	Estradiol levels	206927	rs3851998	0.0139614	0.00269704	2.26005e-07
Body mass index (BMI)	Estradiol levels	206927	rs3866805	0.014034	0.00269441	1.9033e-07
Body mass index (BMI)	Estradiol levels	206927	rs3897102	0.0140149	0.00269573	2.00455e-07
Body mass index (BMI)	Estradiol levels	206927	rs3902951	0.0139741	0.00269692	2.20097e-07
Body mass index (BMI)	Estradiol levels	206927	rs3935190	0.0139296	0.00269782	2.42626e-07
Body mass index (BMI)	Estradiol levels	206927	rs394608	0.0140827	0.00269739	1.78077e-07
Body mass index (BMI)	Estradiol levels	206927	rs40071	0.0139078	0.00270021	2.59616e-07
Body mass index (BMI)	Estradiol levels	206927	rs4017425	0.0139982	0.00269666	2.09249e-07
Body mass index (BMI)	Estradiol levels	206927	rs4055791	0.0138761	0.0026984	2.71346e-07
Body mass index (BMI)	Estradiol levels	206927	rs406388	0.0138963	0.00269623	2.54994e-07
Body mass index (BMI)	Estradiol levels	206927	rs41279738	0.01367	0.00269353	3.87213e-07
Body mass index (BMI)	Estradiol levels	206927	rs4148155	0.0140734	0.00269485	1.76698e-07
Body mass index (BMI)	Estradiol levels	206927	rs4261944	0.013971	0.00269743	2.22631e-07
Body mass index (BMI)	Estradiol levels	206927	rs4267103	0.01385	0.00269373	2.72473e-07
Body mass index (BMI)	Estradiol levels	206927	rs4284600	0.0139787	0.00269685	2.17943e-07
Body mass index (BMI)	Estradiol levels	206927	rs429343	0.013743	0.00269219	3.31197e-07
Body mass index (BMI)	Estradiol levels	206927	rs429358	0.0134674	0.00267077	4.59456e-07
Body mass index (BMI)	Estradiol levels	206927	rs4307239	0.01387	0.00269501	2.65314e-07
Body mass index (BMI)	Estradiol levels	206927	rs4419475	0.0139975	0.00269614	2.08406e-07
Body mass index (BMI)	Estradiol levels	206927	rs4444317	0.0138645	0.00269549	2.69536e-07
Body mass index (BMI)	Estradiol levels	206927	rs4456769	0.0140203	0.00269657	2.00041e-07
Body mass index (BMI)	Estradiol levels	206927	rs4477562	0.0140177	0.00269975	2.07818e-07
Body mass index (BMI)	Estradiol levels	206927	rs4482463	0.0140029	0.00269837	2.10982e-07
Body mass index (BMI)	Estradiol levels	206927	rs45486197	0.0139609	0.00269731	2.26866e-07
Body mass index (BMI)	Estradiol levels	206927	rs4605363	0.0140543	0.00269635	1.86445e-07
Body mass index (BMI)	Estradiol levels	206927	rs4648450	0.0139934	0.00269767	2.13457e-07
Body mass index (BMI)	Estradiol levels	206927	rs4658403	0.0139145	0.00269748	2.49136e-07
Body mass index (BMI)	Estradiol levels	206927	rs4672338	0.0140263	0.0026958	1.96076e-07
Body mass index (BMI)	Estradiol levels	206927	rs4722398	0.0140213	0.00269604	1.98549e-07
Body mass index (BMI)	Estradiol levels	206927	rs4764949	0.0140163	0.00269843	2.05568e-07
Body mass index (BMI)	Estradiol levels	206927	rs4790292	0.013846	0.00269803	2.86806e-07
Body mass index (BMI)	Estradiol levels	206927	rs4820410	0.0141407	0.00269314	1.51561e-07
Body mass index (BMI)	Estradiol levels	206927	rs4832298	0.0140377	0.00269654	1.93159e-07
Body mass index (BMI)	Estradiol levels	206927	rs4858940	0.0141923	0.00268535	1.25634e-07
Body mass index (BMI)	Estradiol levels	206927	rs4876611	0.013813	0.00269649	3.01405e-07
Body mass index (BMI)	Estradiol levels	206927	rs4929923	0.0137554	0.00269407	3.29422e-07
Body mass index (BMI)	Estradiol levels	206927	rs5011579	0.0138409	0.00269374	2.77445e-07
Body mass index (BMI)	Estradiol levels	206927	rs512121	0.0138989	0.00269642	2.54191e-07
Body mass index (BMI)	Estradiol levels	206927	rs529200	0.0140183	0.00269821	2.04262e-07
Body mass index (BMI)	Estradiol levels	206927	rs539515	0.013453	0.00270906	6.83723e-07
Body mass index (BMI)	Estradiol levels	206927	rs55707359	0.0140561	0.00269436	1.81994e-07
Body mass index (BMI)	Estradiol levels	206927	rs55714539	0.0141183	0.00269412	1.60242e-07
Body mass index (BMI)	Estradiol levels	206927	rs55726687	0.0141255	0.00269715	1.63026e-07
Body mass index (BMI)	Estradiol levels	206927	rs55769038	0.0141669	0.00268989	1.38863e-07
Body mass index (BMI)	Estradiol levels	206927	rs558887	0.0138068	0.00269026	2.86456e-07
Body mass index (BMI)	Estradiol levels	206927	rs559231	0.0139135	0.00269709	2.48669e-07
Body mass index (BMI)	Estradiol levels	206927	rs56038322	0.0138659	0.00269528	2.68233e-07
Body mass index (BMI)	Estradiol levels	206927	rs56094641	0.0140827	0.00276485	3.51556e-07
Body mass index (BMI)	Estradiol levels	206927	rs56133507	0.0139765	0.00269658	2.18286e-07
Body mass index (BMI)	Estradiol levels	206927	rs56143236	0.0138504	0.00269292	2.69976e-07
Body mass index (BMI)	Estradiol levels	206927	rs56161855	0.0138602	0.00269656	2.74799e-07
Body mass index (BMI)	Estradiol levels	206927	rs56203622	0.0140866	0.00269203	1.67038e-07
Body mass index (BMI)	Estradiol levels	206927	rs56352336	0.013937	0.00269697	2.37072e-07
Body mass index (BMI)	Estradiol levels	206927	rs56399737	0.0138296	0.00269587	2.89858e-07
Body mass index (BMI)	Estradiol levels	206927	rs56858768	0.013849	0.00269566	2.78362e-07
Body mass index (BMI)	Estradiol levels	206927	rs56893062	0.0139885	0.0026965	2.1296e-07
Body mass index (BMI)	Estradiol levels	206927	rs56930105	0.0138882	0.00269518	2.5636e-07
Body mass index (BMI)	Estradiol levels	206927	rs57636386	0.0140858	0.00270047	1.82784e-07
Body mass index (BMI)	Estradiol levels	206927	rs57989773	0.0138494	0.00269291	2.70509e-07
Body mass index (BMI)	Estradiol levels	206927	rs58862095	0.0137094	0.00269654	3.69431e-07
Body mass index (BMI)	Estradiol levels	206927	rs59068084	0.0138061	0.0026884	2.81527e-07
Body mass index (BMI)	Estradiol levels	206927	rs59227842	0.0140389	0.00270021	2.00159e-07
Body mass index (BMI)	Estradiol levels	206927	rs594024	0.0137852	0.00269194	3.04058e-07
Body mass index (BMI)	Estradiol levels	206927	rs6023655	0.0140894	0.00269159	1.65345e-07
Body mass index (BMI)	Estradiol levels	206927	rs60764613	0.0137435	0.00268879	3.19789e-07
Body mass index (BMI)	Estradiol levels	206927	rs61740466	0.0139853	0.00269657	2.1446e-07
Body mass index (BMI)	Estradiol levels	206927	rs61813324	0.0137904	0.00269712	3.17065e-07
Body mass index (BMI)	Estradiol levels	206927	rs61828641	0.0138889	0.00269683	2.60401e-07
Body mass index (BMI)	Estradiol levels	206927	rs61871615	0.0139342	0.00269797	2.40802e-07
Body mass index (BMI)	Estradiol levels	206927	rs61903695	0.0139015	0.00269741	2.55464e-07
Body mass index (BMI)	Estradiol levels	206927	rs61992671	0.0139425	0.00269834	2.37811e-07
Body mass index (BMI)	Estradiol levels	206927	rs62007782	0.0139793	0.0026979	2.20021e-07
Body mass index (BMI)	Estradiol levels	206927	rs62020775	0.0139758	0.00269676	2.19013e-07
Body mass index (BMI)	Estradiol levels	206927	rs62072006	0.0139539	0.00269683	2.289e-07
Body mass index (BMI)	Estradiol levels	206927	rs62107261	0.0139086	0.00271474	3.00139e-07
Body mass index (BMI)	Estradiol levels	206927	rs62176243	0.0137689	0.00268812	3.02093e-07
Body mass index (BMI)	Estradiol levels	206927	rs62190049	0.0138998	0.00269569	2.51851e-07
Body mass index (BMI)	Estradiol levels	206927	rs62241847	0.0139984	0.00269624	2.08223e-07
Body mass index (BMI)	Estradiol levels	206927	rs62246311	0.0139306	0.00269717	2.40551e-07
Body mass index (BMI)	Estradiol levels	206927	rs62379271	0.0137513	0.00268293	2.96769e-07
Body mass index (BMI)	Estradiol levels	206927	rs62407562	0.0140352	0.00269543	1.91898e-07
Body mass index (BMI)	Estradiol levels	206927	rs6265	0.0137382	0.00270575	3.82633e-07
Body mass index (BMI)	Estradiol levels	206927	rs6430068	0.013983	0.00269662	2.15585e-07
Body mass index (BMI)	Estradiol levels	206927	rs6444950	0.0140544	0.00269491	1.83654e-07
Body mass index (BMI)	Estradiol levels	206927	rs6545714	0.0139415	0.00270045	2.4347e-07
Body mass index (BMI)	Estradiol levels	206927	rs6560906	0.0139447	0.00269689	2.33252e-07
Body mass index (BMI)	Estradiol levels	206927	rs6561937	0.0138461	0.00269494	2.77974e-07
Body mass index (BMI)	Estradiol levels	206927	rs6567160	0.0142752	0.00272029	1.54017e-07
Body mass index (BMI)	Estradiol levels	206927	rs6575340	0.0136489	0.00268963	3.88211e-07
Body mass index (BMI)	Estradiol levels	206927	rs66679256	0.013665	0.00268054	3.43534e-07
Body mass index (BMI)	Estradiol levels	206927	rs6669341	0.0140425	0.00269755	1.93327e-07
Body mass index (BMI)	Estradiol levels	206927	rs6682438	0.0137654	0.00268657	2.99476e-07
Body mass index (BMI)	Estradiol levels	206927	rs6705567	0.0139979	0.00269732	2.10793e-07
Body mass index (BMI)	Estradiol levels	206927	rs6707827	0.0139753	0.00269657	2.18777e-07
Body mass index (BMI)	Estradiol levels	206927	rs6710091	0.0140755	0.00269117	1.69269e-07
Body mass index (BMI)	Estradiol levels	206927	rs6713781	0.0139253	0.00269731	2.4347e-07
Body mass index (BMI)	Estradiol levels	206927	rs6725931	0.0140046	0.00269696	2.07207e-07
Body mass index (BMI)	Estradiol levels	206927	rs6744646	0.013939	0.00271801	2.92229e-07
Body mass index (BMI)	Estradiol levels	206927	rs6752979	0.0140421	0.00269422	1.86883e-07
Body mass index (BMI)	Estradiol levels	206927	rs67609008	0.0139267	0.00269818	2.4493e-07
Body mass index (BMI)	Estradiol levels	206927	rs6769617	0.0139109	0.00269692	2.49499e-07
Body mass index (BMI)	Estradiol levels	206927	rs6774894	0.0138709	0.0026955	2.66153e-07
Body mass index (BMI)	Estradiol levels	206927	rs6777784	0.0138868	0.00269537	2.57612e-07
Body mass index (BMI)	Estradiol levels	206927	rs6831088	0.0139866	0.00269637	2.13473e-07
Body mass index (BMI)	Estradiol levels	206927	rs6843852	0.0140012	0.00269681	2.08311e-07
Body mass index (BMI)	Estradiol levels	206927	rs6909685	0.0141797	0.00268468	1.27988e-07
Body mass index (BMI)	Estradiol levels	206927	rs6922607	0.0139454	0.00269701	2.3323e-07
Body mass index (BMI)	Estradiol levels	206927	rs6938973	0.0139647	0.00269934	2.29897e-07
Body mass index (BMI)	Estradiol levels	206927	rs6950388	0.0139485	0.00269727	2.32406e-07
Body mass index (BMI)	Estradiol levels	206927	rs6962980	0.0139063	0.00269812	2.54929e-07
Body mass index (BMI)	Estradiol levels	206927	rs698147	0.0139912	0.00269693	2.12764e-07
Body mass index (BMI)	Estradiol levels	206927	rs7024334	0.0141082	0.00268829	1.53749e-07
Body mass index (BMI)	Estradiol levels	206927	rs7027304	0.0138678	0.00269601	2.69193e-07
Body mass index (BMI)	Estradiol levels	206927	rs7034554	0.0139944	0.00269677	2.1105e-07
Body mass index (BMI)	Estradiol levels	206927	rs7038943	0.0141454	0.00268762	1.41585e-07
Body mass index (BMI)	Estradiol levels	206927	rs704061	0.0137885	0.00269219	3.02854e-07
Body mass index (BMI)	Estradiol levels	206927	rs7070670	0.0138721	0.00269475	2.63516e-07
Body mass index (BMI)	Estradiol levels	206927	rs7081254	0.0139547	0.00269697	2.28855e-07
Body mass index (BMI)	Estradiol levels	206927	rs7124681	0.0138792	0.00270319	2.83063e-07
Body mass index (BMI)	Estradiol levels	206927	rs7132908	0.0143732	0.00269635	9.78782e-08
Body mass index (BMI)	Estradiol levels	206927	rs71495038	0.0140469	0.00269619	1.88931e-07
Body mass index (BMI)	Estradiol levels	206927	rs7201895	0.0139641	0.00269785	2.26681e-07
Body mass index (BMI)	Estradiol levels	206927	rs7206608	0.0139861	0.00269697	2.15029e-07
Body mass index (BMI)	Estradiol levels	206927	rs7218014	0.0139989	0.00269773	2.11275e-07
Body mass index (BMI)	Estradiol levels	206927	rs7232171	0.0140055	0.00269627	2.0537e-07
Body mass index (BMI)	Estradiol levels	206927	rs723672	0.0141143	0.00268659	1.4914e-07
Body mass index (BMI)	Estradiol levels	206927	rs7250833	0.0140434	0.00269458	1.87117e-07
Body mass index (BMI)	Estradiol levels	206927	rs7259070	0.0142098	0.00269429	1.33452e-07
Body mass index (BMI)	Estradiol levels	206927	rs72634826	0.0139555	0.00269962	2.348e-07
Body mass index (BMI)	Estradiol levels	206927	rs72649373	0.0140134	0.002696	2.01625e-07
Body mass index (BMI)	Estradiol levels	206927	rs72673947	0.0139368	0.00269752	2.38474e-07
Body mass index (BMI)	Estradiol levels	206927	rs72892910	0.0139412	0.0027063	2.58541e-07
Body mass index (BMI)	Estradiol levels	206927	rs72976986	0.0137044	0.00269074	3.52142e-07
Body mass index (BMI)	Estradiol levels	206927	rs73026725	0.0142234	0.00268547	1.18084e-07
Body mass index (BMI)	Estradiol levels	206927	rs73052033	0.0136465	0.00269464	4.09843e-07
Body mass index (BMI)	Estradiol levels	206927	rs7306534	0.0139284	0.00269657	2.4016e-07
Body mass index (BMI)	Estradiol levels	206927	rs73124396	0.0138133	0.00269148	2.86324e-07
Body mass index (BMI)	Estradiol levels	206927	rs73142879	0.0137905	0.00269821	3.20495e-07
Body mass index (BMI)	Estradiol levels	206927	rs73193736	0.013935	0.00269815	2.40905e-07
Body mass index (BMI)	Estradiol levels	206927	rs73213484	0.0139487	0.00269842	2.35095e-07
Body mass index (BMI)	Estradiol levels	206927	rs7331420	0.0140016	0.00269673	2.07981e-07
Body mass index (BMI)	Estradiol levels	206927	rs7357754	0.0142155	0.00268149	1.14944e-07
Body mass index (BMI)	Estradiol levels	206927	rs73601548	0.0140904	0.00268982	1.61969e-07
Body mass index (BMI)	Estradiol levels	206927	rs73985439	0.0138742	0.00269554	2.64534e-07
Body mass index (BMI)	Estradiol levels	206927	rs7442885	0.014047	0.00269849	1.93457e-07
Body mass index (BMI)	Estradiol levels	206927	rs745249	0.0140691	0.00269595	1.80262e-07
Body mass index (BMI)	Estradiol levels	206927	rs74750282	0.0141004	0.00268839	1.5635e-07
Body mass index (BMI)	Estradiol levels	206927	rs7498665	0.0139325	0.00270419	2.57488e-07
Body mass index (BMI)	Estradiol levels	206927	rs7516554	0.0139775	0.00269682	2.18388e-07
Body mass index (BMI)	Estradiol levels	206927	rs7519259	0.0138124	0.00269311	2.91596e-07
Body mass index (BMI)	Estradiol levels	206927	rs754635	0.0141417	0.00268921	1.45098e-07
Body mass index (BMI)	Estradiol levels	206927	rs75499503	0.0138229	0.00269448	2.89623e-07
Body mass index (BMI)	Estradiol levels	206927	rs7571496	0.0139372	0.00269769	2.38733e-07
Body mass index (BMI)	Estradiol levels	206927	rs76183894	0.0138655	0.00269462	2.66661e-07
Body mass index (BMI)	Estradiol levels	206927	rs7619139	0.0140695	0.00269382	1.76152e-07
Body mass index (BMI)	Estradiol levels	206927	rs76702514	0.0139811	0.00269734	2.18008e-07
Body mass index (BMI)	Estradiol levels	206927	rs7683836	0.0141288	0.0026873	1.45935e-07
Body mass index (BMI)	Estradiol levels	206927	rs7708584	0.0140515	0.00269664	1.881e-07
Body mass index (BMI)	Estradiol levels	206927	rs7761673	0.0140084	0.00269571	2.03001e-07
Body mass index (BMI)	Estradiol levels	206927	rs7762794	0.0141041	0.00269167	1.60659e-07
Body mass index (BMI)	Estradiol levels	206927	rs7774	0.0139666	0.00269766	2.25126e-07
Body mass index (BMI)	Estradiol levels	206927	rs7776021	0.0137629	0.00268362	2.92101e-07
Body mass index (BMI)	Estradiol levels	206927	rs7802342	0.0138508	0.00269304	2.70124e-07
Body mass index (BMI)	Estradiol levels	206927	rs7805441	0.0139465	0.00269753	2.3398e-07
Body mass index (BMI)	Estradiol levels	206927	rs78086698	0.0140514	0.00269427	1.83528e-07
Body mass index (BMI)	Estradiol levels	206927	rs784257	0.0138107	0.00269297	2.92195e-07
Body mass index (BMI)	Estradiol levels	206927	rs78605811	0.0140696	0.00269489	1.78111e-07
Body mass index (BMI)	Estradiol levels	206927	rs7893571	0.0140098	0.00269664	2.04385e-07
Body mass index (BMI)	Estradiol levels	206927	rs7925100	0.0139035	0.00269742	2.54498e-07
Body mass index (BMI)	Estradiol levels	206927	rs7944782	0.0139509	0.00269844	2.34119e-07
Body mass index (BMI)	Estradiol levels	206927	rs7947143	0.0139792	0.00269744	2.19034e-07
Body mass index (BMI)	Estradiol levels	206927	rs79780963	0.013903	0.00269664	2.52719e-07
Body mass index (BMI)	Estradiol levels	206927	rs7996639	0.0139963	0.00269749	2.11853e-07
Body mass index (BMI)	Estradiol levels	206927	rs80135274	0.013978	0.00269653	2.17527e-07
Body mass index (BMI)	Estradiol levels	206927	rs8015400	0.013866	0.00269953	2.79968e-07
Body mass index (BMI)	Estradiol levels	206927	rs8020365	0.0138742	0.00270018	2.77305e-07
Body mass index (BMI)	Estradiol levels	206927	rs8024137	0.0140006	0.00269601	2.06843e-07
Body mass index (BMI)	Estradiol levels	206927	rs8025516	0.014089	0.0026933	1.68478e-07
Body mass index (BMI)	Estradiol levels	206927	rs8076669	0.0140837	0.00269365	1.70917e-07
Body mass index (BMI)	Estradiol levels	206927	rs8089514	0.0138837	0.00269584	2.60423e-07
Body mass index (BMI)	Estradiol levels	206927	rs8112818	0.0138578	0.00269954	2.84546e-07
Body mass index (BMI)	Estradiol levels	206927	rs8132491	0.0137977	0.00269204	2.96957e-07
Body mass index (BMI)	Estradiol levels	206927	rs815163	0.0140161	0.00269801	2.04747e-07
Body mass index (BMI)	Estradiol levels	206927	rs852042	0.0140258	0.00269488	1.94377e-07
Body mass index (BMI)	Estradiol levels	206927	rs862320	0.0137147	0.00269693	3.67009e-07
Body mass index (BMI)	Estradiol levels	206927	rs879620	0.0140736	0.00270109	1.8849e-07
Body mass index (BMI)	Estradiol levels	206927	rs909892	0.0140165	0.00269601	2.00379e-07
Body mass index (BMI)	Estradiol levels	206927	rs923994	0.0140921	0.00269072	1.62928e-07
Body mass index (BMI)	Estradiol levels	206927	rs9267671	0.0137884	0.00268922	2.93973e-07
Body mass index (BMI)	Estradiol levels	206927	rs9291822	0.0139482	0.00269783	2.33921e-07
Body mass index (BMI)	Estradiol levels	206927	rs9294260	0.0141094	0.00269269	1.6069e-07
Body mass index (BMI)	Estradiol levels	206927	rs9349235	0.0137849	0.0026861	2.86768e-07
Body mass index (BMI)	Estradiol levels	206927	rs935166	0.0137764	0.00269309	3.12956e-07
Body mass index (BMI)	Estradiol levels	206927	rs9463175	0.0140087	0.00269547	2.02375e-07
Body mass index (BMI)	Estradiol levels	206927	rs9478496	0.0140506	0.0026951	1.85433e-07
Body mass index (BMI)	Estradiol levels	206927	rs9515446	0.0139157	0.00269791	2.49676e-07
Body mass index (BMI)	Estradiol levels	206927	rs9522180	0.0140027	0.00269718	2.0849e-07
Body mass index (BMI)	Estradiol levels	206927	rs9571687	0.0139121	0.00269689	2.48816e-07
Body mass index (BMI)	Estradiol levels	206927	rs9638713	0.0138722	0.00269454	2.62929e-07
Body mass index (BMI)	Estradiol levels	206927	rs9673839	0.0140097	0.00269651	2.0416e-07
Body mass index (BMI)	Estradiol levels	206927	rs9674487	0.0139889	0.00269621	2.12134e-07
Body mass index (BMI)	Estradiol levels	206927	rs9830592	0.014075	0.00269527	1.7691e-07
Body mass index (BMI)	Estradiol levels	206927	rs9839081	0.0140363	0.00269393	1.88496e-07
Body mass index (BMI)	Estradiol levels	206927	rs9843653	0.0133257	0.00268541	6.9683e-07
Body mass index (BMI)	Estradiol levels	206927	rs9876664	0.013937	0.00269915	2.42414e-07
Body mass index (BMI)	Estradiol levels	206927	rs9888533	0.0138493	0.00269351	2.72224e-07
Body mass index (BMI)	Estradiol levels	206927	rs9926784	0.0137486	0.00269402	3.3361e-07
Body mass index (BMI)	Estradiol levels	206927	rs9951619	0.0139057	0.00269646	2.50938e-07
Body mass index (BMI)	Estradiol levels	206927	All	0.0139518	0.00269205	2.18795e-07

## Sheet: Table S13
Supplementary Table S13: Leave one out analysis for the effect of BMI on SHBG level.
Exposure	Outcome	Samplesize	SNP	beta	se	p
Body mass index (BMI)	Sex hormone-binding globulin levels	180726	rs10063055	-0.102415	0.00550971	4.01039e-77
Body mass index (BMI)	Sex hormone-binding globulin levels	180726	rs10099330	-0.102575	0.00551622	3.51285e-77
Body mass index (BMI)	Sex hormone-binding globulin levels	180726	rs10160769	-0.102733	0.00551488	1.8915e-77
Body mass index (BMI)	Sex hormone-binding globulin levels	180726	rs10169594	-0.102499	0.0055138	3.90022e-77
Body mass index (BMI)	Sex hormone-binding globulin levels	180726	rs10182416	-0.10243	0.00551242	4.52494e-77
Body mass index (BMI)	Sex hormone-binding globulin levels	180726	rs10423928	-0.103129	0.00552505	9.40846e-78
Body mass index (BMI)	Sex hormone-binding globulin levels	180726	rs10505836	-0.102552	0.00551611	3.7812e-77
Body mass index (BMI)	Sex hormone-binding globulin levels	180726	rs10510025	-0.102892	0.00551165	9.0091e-78
Body mass index (BMI)	Sex hormone-binding globulin levels	180726	rs1064213	-0.10278	0.00551603	1.73599e-77
Body mass index (BMI)	Sex hormone-binding globulin levels	180726	rs10742752	-0.102927	0.00549995	3.80085e-78
Body mass index (BMI)	Sex hormone-binding globulin levels	180726	rs10756714	-0.102926	0.00551939	1.30877e-77
Body mass index (BMI)	Sex hormone-binding globulin levels	180726	rs10756792	-0.102628	0.00552002	3.72743e-77
Body mass index (BMI)	Sex hormone-binding globulin levels	180726	rs10760277	-0.102969	0.00550229	3.82348e-78
Body mass index (BMI)	Sex hormone-binding globulin levels	180726	rs10780248	-0.102558	0.00551571	3.60374e-77
Body mass index (BMI)	Sex hormone-binding globulin levels	180726	rs1078141	-0.102445	0.00551391	4.72509e-77
Body mass index (BMI)	Sex hormone-binding globulin levels	180726	rs10799778	-0.102747	0.00551551	1.8792e-77
Body mass index (BMI)	Sex hormone-binding globulin levels	180726	rs10809621	-0.10274	0.00551394	1.74115e-77
Body mass index (BMI)	Sex hormone-binding globulin levels	180726	rs10824211	-0.102662	0.0055179	2.91679e-77
Body mass index (BMI)	Sex hormone-binding globulin levels	180726	rs10832778	-0.103013	0.00548806	1.31792e-78
Body mass index (BMI)	Sex hormone-binding globulin levels	180726	rs10927006	-0.102393	0.00550806	3.90092e-77
Body mass index (BMI)	Sex hormone-binding globulin levels	180726	rs10965698	-0.102814	0.00550832	9.51382e-78
Body mass index (BMI)	Sex hormone-binding globulin levels	180726	rs10989067	-0.102691	0.00551875	2.78224e-77
Body mass index (BMI)	Sex hormone-binding globulin levels	180726	rs11001963	-0.102523	0.00551439	3.73756e-77
Body mass index (BMI)	Sex hormone-binding globulin levels	180726	rs11009685	-0.102733	0.0055135	1.73734e-77
Body mass index (BMI)	Sex hormone-binding globulin levels	180726	rs11012732	-0.103389	0.00549264	4.87174e-79
Body mass index (BMI)	Sex hormone-binding globulin levels	180726	rs11079849	-0.102202	0.00551273	9.94396e-77
Body mass index (BMI)	Sex hormone-binding globulin levels	180726	rs11099020	-0.102567	0.00551714	3.83475e-77
Body mass index (BMI)	Sex hormone-binding globulin levels	180726	rs11115160	-0.102656	0.0055154	2.54162e-77
Body mass index (BMI)	Sex hormone-binding globulin levels	180726	rs11122450	-0.1026	0.0055158	3.14499e-77
Body mass index (BMI)	Sex hormone-binding globulin levels	180726	rs11134679	-0.102666	0.00552022	3.32849e-77
Body mass index (BMI)	Sex hormone-binding globulin levels	180726	rs11150745	-0.102825	0.00552178	2.14386e-77
Body mass index (BMI)	Sex hormone-binding globulin levels	180726	rs111598585	-0.102177	0.00548319	1.68448e-77
Body mass index (BMI)	Sex hormone-binding globulin levels	180726	rs11165643	-0.102229	0.00551339	9.4609e-77
Body mass index (BMI)	Sex hormone-binding globulin levels	180726	rs111689389	-0.102723	0.00551488	1.95718e-77
Body mass index (BMI)	Sex hormone-binding globulin levels	180726	rs11218510	-0.103092	0.00549298	1.37877e-78
Body mass index (BMI)	Sex hormone-binding globulin levels	180726	rs113079574	-0.102504	0.0055145	4.01344e-77
Body mass index (BMI)	Sex hormone-binding globulin levels	180726	rs113624107	-0.102449	0.00551259	4.28947e-77
Body mass index (BMI)	Sex hormone-binding globulin levels	180726	rs11525873	-0.102905	0.0055091	7.32733e-78
Body mass index (BMI)	Sex hormone-binding globulin levels	180726	rs11607476	-0.102509	0.00551799	4.91006e-77
Body mass index (BMI)	Sex hormone-binding globulin levels	180726	rs11610621	-0.102847	0.00550759	8.09483e-78
Body mass index (BMI)	Sex hormone-binding globulin levels	180726	rs11630647	-0.102688	0.00551472	2.18098e-77
Body mass index (BMI)	Sex hormone-binding globulin levels	180726	rs116374395	-0.102527	0.0055147	3.75962e-77
Body mass index (BMI)	Sex hormone-binding globulin levels	180726	rs11642090	-0.102586	0.00551535	3.21407e-77
Body mass index (BMI)	Sex hormone-binding globulin levels	180726	rs11656076	-0.102621	0.00551718	3.19377e-77
Body mass index (BMI)	Sex hormone-binding globulin levels	180726	rs1167311	-0.102994	0.00551164	6.36253e-78
Body mass index (BMI)	Sex hormone-binding globulin levels	180726	rs11675464	-0.102637	0.00551618	2.84712e-77
Body mass index (BMI)	Sex hormone-binding globulin levels	180726	rs11691869	-0.102886	0.00551753	1.33116e-77
Body mass index (BMI)	Sex hormone-binding globulin levels	180726	rs11699828	-0.102557	0.00551524	3.51616e-77
Body mass index (BMI)	Sex hormone-binding globulin levels	180726	rs11709402	-0.102321	0.00551934	1.00798e-76
Body mass index (BMI)	Sex hormone-binding globulin levels	180726	rs117118217	-0.102701	0.00551469	2.08387e-77
Body mass index (BMI)	Sex hormone-binding globulin levels	180726	rs11757278	-0.102619	0.0055173	3.23712e-77
Body mass index (BMI)	Sex hormone-binding globulin levels	180726	rs11778219	-0.102396	0.00550789	3.81259e-77
Body mass index (BMI)	Sex hormone-binding globulin levels	180726	rs11919665	-0.102585	0.00551606	3.36508e-77
Body mass index (BMI)	Sex hormone-binding globulin levels	180726	rs12001437	-0.102539	0.00551505	3.68698e-77
Body mass index (BMI)	Sex hormone-binding globulin levels	180726	rs12072739	-0.102262	0.00550079	3.83609e-77
Body mass index (BMI)	Sex hormone-binding globulin levels	180726	rs12088284	-0.102307	0.0055038	3.99141e-77
Body mass index (BMI)	Sex hormone-binding globulin levels	180726	rs12089815	-0.102512	0.00551479	3.98031e-77
Body mass index (BMI)	Sex hormone-binding globulin levels	180726	rs12140153	-0.102649	0.00552264	4.10421e-77
Body mass index (BMI)	Sex hormone-binding globulin levels	180726	rs12149660	-0.102758	0.00551605	1.87448e-77
Body mass index (BMI)	Sex hormone-binding globulin levels	180726	rs12259464	-0.102384	0.00550988	4.5045e-77
Body mass index (BMI)	Sex hormone-binding globulin levels	180726	rs12273545	-0.102807	0.00550976	1.06713e-77
Body mass index (BMI)	Sex hormone-binding globulin levels	180726	rs1229984	-0.103002	0.00549078	1.63054e-78
Body mass index (BMI)	Sex hormone-binding globulin levels	180726	rs12364470	-0.102475	0.00551577	4.79299e-77
Body mass index (BMI)	Sex hormone-binding globulin levels	180726	rs12440603	-0.102653	0.00551744	2.91674e-77
Body mass index (BMI)	Sex hormone-binding globulin levels	180726	rs12459368	-0.102464	0.0055163	5.14575e-77
Body mass index (BMI)	Sex hormone-binding globulin levels	180726	rs12462975	-0.102916	0.00551591	1.08826e-77
Body mass index (BMI)	Sex hormone-binding globulin levels	180726	rs12541408	-0.102424	0.0055124	4.61033e-77
Body mass index (BMI)	Sex hormone-binding globulin levels	180726	rs1266874	-0.102733	0.00551569	1.99247e-77
Body mass index (BMI)	Sex hormone-binding globulin levels	180726	rs12681792	-0.102505	0.00551395	3.86346e-77
Body mass index (BMI)	Sex hormone-binding globulin levels	180726	rs12692596	-0.102411	0.00551081	4.35879e-77
Body mass index (BMI)	Sex hormone-binding globulin levels	180726	rs12696039	-0.102623	0.00551554	2.86552e-77
Body mass index (BMI)	Sex hormone-binding globulin levels	180726	rs1286058	-0.102892	0.00550843	7.3314e-78
Body mass index (BMI)	Sex hormone-binding globulin levels	180726	rs12881629	-0.102602	0.00551628	3.22365e-77
Body mass index (BMI)	Sex hormone-binding globulin levels	180726	rs12921986	-0.102575	0.00551515	3.28984e-77
Body mass index (BMI)	Sex hormone-binding globulin levels	180726	rs1296328	-0.102594	0.00552217	4.79656e-77
Body mass index (BMI)	Sex hormone-binding globulin levels	180726	rs12974458	-0.102813	0.00551498	1.45149e-77
Body mass index (BMI)	Sex hormone-binding globulin levels	180726	rs13012070	-0.10269	0.00551507	2.2134e-77
Body mass index (BMI)	Sex hormone-binding globulin levels	180726	rs13033310	-0.102516	0.00551361	3.63946e-77
Body mass index (BMI)	Sex hormone-binding globulin levels	180726	rs13097918	-0.10259	0.00551605	3.30894e-77
Body mass index (BMI)	Sex hormone-binding globulin levels	180726	rs13107325	-0.103612	0.00549594	2.80492e-79
Body mass index (BMI)	Sex hormone-binding globulin levels	180726	rs13176429	-0.102803	0.00551271	1.30362e-77
Body mass index (BMI)	Sex hormone-binding globulin levels	180726	rs1320251	-0.102864	0.00551803	1.48036e-77
Body mass index (BMI)	Sex hormone-binding globulin levels	180726	rs13218383	-0.102686	0.00551687	2.51292e-77
Body mass index (BMI)	Sex hormone-binding globulin levels	180726	rs1322842	-0.102543	0.00551598	3.86461e-77
Body mass index (BMI)	Sex hormone-binding globulin levels	180726	rs13248187	-0.102458	0.00551471	4.74345e-77
Body mass index (BMI)	Sex hormone-binding globulin levels	180726	rs1327259	-0.102603	0.00551803	3.58047e-77
Body mass index (BMI)	Sex hormone-binding globulin levels	180726	rs13291723	-0.10274	0.00551278	1.62117e-77
Body mass index (BMI)	Sex hormone-binding globulin levels	180726	rs1330199	-0.102741	0.00551364	1.70371e-77
Body mass index (BMI)	Sex hormone-binding globulin levels	180726	rs13420048	-0.102537	0.00551785	4.4344e-77
Body mass index (BMI)	Sex hormone-binding globulin levels	180726	rs13427822	-0.102556	0.0055192	4.52546e-77
Body mass index (BMI)	Sex hormone-binding globulin levels	180726	rs1346841	-0.102795	0.00551261	1.32967e-77
Body mass index (BMI)	Sex hormone-binding globulin levels	180726	rs1360201	-0.102316	0.00550494	4.15229e-77
Body mass index (BMI)	Sex hormone-binding globulin levels	180726	rs13642	-0.102467	0.00551688	5.28068e-77
Body mass index (BMI)	Sex hormone-binding globulin levels	180726	rs140159717	-0.102262	0.00550087	3.85872e-77
Body mass index (BMI)	Sex hormone-binding globulin levels	180726	rs1438945	-0.102466	0.00551267	4.06897e-77
Body mass index (BMI)	Sex hormone-binding globulin levels	180726	rs1441264	-0.102833	0.00551714	1.55604e-77
Body mass index (BMI)	Sex hormone-binding globulin levels	180726	rs1451963	-0.102858	0.00550781	7.91828e-78
Body mass index (BMI)	Sex hormone-binding globulin levels	180726	rs1458156	-0.102532	0.00551698	4.25964e-77
Body mass index (BMI)	Sex hormone-binding globulin levels	180726	rs145981104	-0.102639	0.00551557	2.71743e-77
Body mass index (BMI)	Sex hormone-binding globulin levels	180726	rs146569428	-0.102498	0.00551305	3.73167e-77
Body mass index (BMI)	Sex hormone-binding globulin levels	180726	rs1471093	-0.102489	0.00551481	4.29624e-77
Body mass index (BMI)	Sex hormone-binding globulin levels	180726	rs147568678	-0.102831	0.00550813	8.8451e-78
Body mass index (BMI)	Sex hormone-binding globulin levels	180726	rs1477290	-0.10243	0.00552593	1.05401e-76
Body mass index (BMI)	Sex hormone-binding globulin levels	180726	rs147730268	-0.10245	0.00552135	7.39984e-77
Body mass index (BMI)	Sex hormone-binding globulin levels	180726	rs1503526	-0.103028	0.00550328	3.32971e-78
Body mass index (BMI)	Sex hormone-binding globulin levels	180726	rs156201	-0.102628	0.0055158	2.85879e-77
Body mass index (BMI)	Sex hormone-binding globulin levels	180726	rs156914	-0.102575	0.00551541	3.33665e-77
Body mass index (BMI)	Sex hormone-binding globulin levels	180726	rs1582931	-0.10293	0.0055048	5.11167e-78
Body mass index (BMI)	Sex hormone-binding globulin levels	180726	rs1608113	-0.102936	0.00549834	3.3193e-78
Body mass index (BMI)	Sex hormone-binding globulin levels	180726	rs1609010	-0.102609	0.00552459	5.30536e-77
Body mass index (BMI)	Sex hormone-binding globulin levels	180726	rs16916303	-0.102328	0.00550411	3.78974e-77
Body mass index (BMI)	Sex hormone-binding globulin levels	180726	rs17056301	-0.103055	0.00548582	9.90099e-79
Body mass index (BMI)	Sex hormone-binding globulin levels	180726	rs17132130	-0.102434	0.00551488	5.21542e-77
Body mass index (BMI)	Sex hormone-binding globulin levels	180726	rs17149254	-0.102567	0.00551968	4.48542e-77
Body mass index (BMI)	Sex hormone-binding globulin levels	180726	rs17289010	-0.102839	0.00551006	9.74374e-78
Body mass index (BMI)	Sex hormone-binding globulin levels	180726	rs17399739	-0.10287	0.00551027	8.89374e-78
Body mass index (BMI)	Sex hormone-binding globulin levels	180726	rs17446299	-0.10254	0.00551475	3.60909e-77
Body mass index (BMI)	Sex hormone-binding globulin levels	180726	rs17544384	-0.102823	0.00550907	9.66323e-78
Body mass index (BMI)	Sex hormone-binding globulin levels	180726	rs17668356	-0.10257	0.00551958	4.41164e-77
Body mass index (BMI)	Sex hormone-binding globulin levels	180726	rs17770336	-0.102326	0.00552345	1.28006e-76
Body mass index (BMI)	Sex hormone-binding globulin levels	180726	rs1778830	-0.102702	0.00551659	2.33802e-77
Body mass index (BMI)	Sex hormone-binding globulin levels	180726	rs1788808	-0.102652	0.0055239	4.39005e-77
Body mass index (BMI)	Sex hormone-binding globulin levels	180726	rs1793636	-0.102651	0.00551631	2.7331e-77
Body mass index (BMI)	Sex hormone-binding globulin levels	180726	rs1805123	-0.102645	0.00551804	3.11556e-77
Body mass index (BMI)	Sex hormone-binding globulin levels	180726	rs1834144	-0.102489	0.00551526	4.43156e-77
Body mass index (BMI)	Sex hormone-binding globulin levels	180726	rs1861410	-0.101826	0.00549364	1.07328e-76
Body mass index (BMI)	Sex hormone-binding globulin levels	180726	rs1884897	-0.102303	0.00551669	9.05919e-77
Body mass index (BMI)	Sex hormone-binding globulin levels	180726	rs1919243	-0.102692	0.00551504	2.19927e-77
Body mass index (BMI)	Sex hormone-binding globulin levels	180726	rs1967772	-0.102516	0.00551783	4.74331e-77
Body mass index (BMI)	Sex hormone-binding globulin levels	180726	rs2035936	-0.102832	0.00551665	1.51438e-77
Body mass index (BMI)	Sex hormone-binding globulin levels	180726	rs2075466	-0.102835	0.00550843	8.90772e-78
Body mass index (BMI)	Sex hormone-binding globulin levels	180726	rs2102278	-0.102269	0.0054934	2.35501e-77
Body mass index (BMI)	Sex hormone-binding globulin levels	180726	rs2133561	-0.102594	0.00551734	3.53683e-77
Body mass index (BMI)	Sex hormone-binding globulin levels	180726	rs213518	-0.10268	0.00551505	2.29105e-77
Body mass index (BMI)	Sex hormone-binding globulin levels	180726	rs2153740	-0.10288	0.00550344	5.55523e-78
Body mass index (BMI)	Sex hormone-binding globulin levels	180726	rs215634	-0.1025	0.00551729	4.84656e-77
Body mass index (BMI)	Sex hormone-binding globulin levels	180726	rs2172131	-0.102054	0.00548615	3.08642e-77
Body mass index (BMI)	Sex hormone-binding globulin levels	180726	rs217672	-0.102159	0.00549793	4.55467e-77
Body mass index (BMI)	Sex hormone-binding globulin levels	180726	rs2192158	-0.102591	0.0055185	3.83988e-77
Body mass index (BMI)	Sex hormone-binding globulin levels	180726	rs2216931	-0.10267	0.00551934	3.10392e-77
Body mass index (BMI)	Sex hormone-binding globulin levels	180726	rs2234458	-0.103007	0.00551452	7.30569e-78
Body mass index (BMI)	Sex hormone-binding globulin levels	180726	rs2248551	-0.102299	0.00549624	2.54249e-77
Body mass index (BMI)	Sex hormone-binding globulin levels	180726	rs2253310	-0.102378	0.00551552	6.54613e-77
Body mass index (BMI)	Sex hormone-binding globulin levels	180726	rs2271189	-0.102196	0.00550397	5.86067e-77
Body mass index (BMI)	Sex hormone-binding globulin levels	180726	rs2289379	-0.102738	0.00551711	2.1446e-77
Body mass index (BMI)	Sex hormone-binding globulin levels	180726	rs2307111	-0.103294	0.00552017	3.94216e-78
Body mass index (BMI)	Sex hormone-binding globulin levels	180726	rs2342892	-0.103145	0.00547813	4.40237e-79
Body mass index (BMI)	Sex hormone-binding globulin levels	180726	rs2381404	-0.102665	0.00551593	2.5502e-77
Body mass index (BMI)	Sex hormone-binding globulin levels	180726	rs2383377	-0.102571	0.00551503	3.31293e-77
Body mass index (BMI)	Sex hormone-binding globulin levels	180726	rs2398861	-0.102517	0.00551825	4.86032e-77
Body mass index (BMI)	Sex hormone-binding globulin levels	180726	rs2425816	-0.102632	0.00551623	2.89643e-77
Body mass index (BMI)	Sex hormone-binding globulin levels	180726	rs2433733	-0.102721	0.0055187	2.50836e-77
Body mass index (BMI)	Sex hormone-binding globulin levels	180726	rs2439823	-0.102791	0.00552097	2.28406e-77
Body mass index (BMI)	Sex hormone-binding globulin levels	180726	rs2482356	-0.102708	0.00551433	1.98679e-77
Body mass index (BMI)	Sex hormone-binding globulin levels	180726	rs2512892	-0.102638	0.00551679	2.94944e-77
Body mass index (BMI)	Sex hormone-binding globulin levels	180726	rs252761	-0.102817	0.00550884	9.70516e-78
Body mass index (BMI)	Sex hormone-binding globulin levels	180726	rs2568958	-0.1025	0.00552546	8.08283e-77
Body mass index (BMI)	Sex hormone-binding globulin levels	180726	rs2569993	-0.102239	0.00549296	2.53544e-77
Body mass index (BMI)	Sex hormone-binding globulin levels	180726	rs2606228	-0.102645	0.00551701	2.91763e-77
Body mass index (BMI)	Sex hormone-binding globulin levels	180726	rs2616143	-0.102743	0.00551491	1.83447e-77
Body mass index (BMI)	Sex hormone-binding globulin levels	180726	rs2618039	-0.102762	0.0055155	1.78439e-77
Body mass index (BMI)	Sex hormone-binding globulin levels	180726	rs2678204	-0.102747	0.00552677	3.81355e-77
Body mass index (BMI)	Sex hormone-binding globulin levels	180726	rs2725371	-0.102459	0.0055157	5.03765e-77
Body mass index (BMI)	Sex hormone-binding globulin levels	180726	rs28350	-0.102728	0.00551618	2.08888e-77
Body mass index (BMI)	Sex hormone-binding globulin levels	180726	rs28366156	-0.103313	0.00548771	4.60911e-79
Body mass index (BMI)	Sex hormone-binding globulin levels	180726	rs2837996	-0.10251	0.00551445	3.91716e-77
Body mass index (BMI)	Sex hormone-binding globulin levels	180726	rs28404639	-0.10247	0.00551187	3.81275e-77
Body mass index (BMI)	Sex hormone-binding globulin levels	180726	rs28568418	-0.102885	0.00550326	5.40149e-78
Body mass index (BMI)	Sex hormone-binding globulin levels	180726	rs2861685	-0.102687	0.00552009	3.06758e-77
Body mass index (BMI)	Sex hormone-binding globulin levels	180726	rs28670671	-0.102502	0.00551293	3.65756e-77
Body mass index (BMI)	Sex hormone-binding globulin levels	180726	rs2870111	-0.102334	0.00551127	5.81667e-77
Body mass index (BMI)	Sex hormone-binding globulin levels	180726	rs2899644	-0.102395	0.00550953	4.24949e-77
Body mass index (BMI)	Sex hormone-binding globulin levels	180726	rs2962334	-0.102686	0.00551562	2.32844e-77
Body mass index (BMI)	Sex hormone-binding globulin levels	180726	rs317656	-0.102852	0.00550973	9.14102e-78
Body mass index (BMI)	Sex hormone-binding globulin levels	180726	rs32421	-0.102703	0.00551428	2.01954e-77
Body mass index (BMI)	Sex hormone-binding globulin levels	180726	rs329651	-0.102718	0.00551513	2.02321e-77
Body mass index (BMI)	Sex hormone-binding globulin levels	180726	rs34045288	-0.10233	0.00552243	1.18409e-76
Body mass index (BMI)	Sex hormone-binding globulin levels	180726	rs34153025	-0.102951	0.00549694	2.88197e-78
Body mass index (BMI)	Sex hormone-binding globulin levels	180726	rs34234296	-0.102165	0.00549637	4.03358e-77
Body mass index (BMI)	Sex hormone-binding globulin levels	180726	rs34481751	-0.101972	0.00546671	1.18726e-77
Body mass index (BMI)	Sex hormone-binding globulin levels	180726	rs34517439	-0.103076	0.00552353	1.02398e-77
Body mass index (BMI)	Sex hormone-binding globulin levels	180726	rs34696181	-0.102937	0.00549858	3.36531e-78
Body mass index (BMI)	Sex hormone-binding globulin levels	180726	rs34811474	-0.102724	0.00552857	4.62133e-77
Body mass index (BMI)	Sex hormone-binding globulin levels	180726	rs349071	-0.10238	0.00550998	4.58709e-77
Body mass index (BMI)	Sex hormone-binding globulin levels	180726	rs35154326	-0.103076	0.00548068	6.59353e-79
Body mass index (BMI)	Sex hormone-binding globulin levels	180726	rs35364449	-0.102517	0.00551616	4.25663e-77
Body mass index (BMI)	Sex hormone-binding globulin levels	180726	rs355777	-0.102581	0.00551844	3.96041e-77
Body mass index (BMI)	Sex hormone-binding globulin levels	180726	rs35697587	-0.102377	0.0055151	6.39888e-77
Body mass index (BMI)	Sex hormone-binding globulin levels	180726	rs35697691	-0.103051	0.00549201	1.49509e-78
Body mass index (BMI)	Sex hormone-binding globulin levels	180726	rs35809007	-0.102264	0.00550967	6.66615e-77
Body mass index (BMI)	Sex hormone-binding globulin levels	180726	rs35957544	-0.102245	0.00551463	9.70084e-77
Body mass index (BMI)	Sex hormone-binding globulin levels	180726	rs36007635	-0.102482	0.00551614	4.79432e-77
Body mass index (BMI)	Sex hormone-binding globulin levels	180726	rs36061954	-0.102382	0.00550877	4.22733e-77
Body mass index (BMI)	Sex hormone-binding globulin levels	180726	rs3764625	-0.102207	0.00548753	2.00375e-77
Body mass index (BMI)	Sex hormone-binding globulin levels	180726	rs3784710	-0.10331	0.00551253	2.2943e-78
Body mass index (BMI)	Sex hormone-binding globulin levels	180726	rs3803286	-0.102902	0.00551529	1.09574e-77
Body mass index (BMI)	Sex hormone-binding globulin levels	180726	rs3807566	-0.102634	0.0055162	2.87995e-77
Body mass index (BMI)	Sex hormone-binding globulin levels	180726	rs3814883	-0.102499	0.00552805	9.51912e-77
Body mass index (BMI)	Sex hormone-binding globulin levels	180726	rs3845344	-0.102969	0.00550905	5.87517e-78
Body mass index (BMI)	Sex hormone-binding globulin levels	180726	rs3851998	-0.102504	0.00551405	3.90417e-77
Body mass index (BMI)	Sex hormone-binding globulin levels	180726	rs3866805	-0.102095	0.0054679	8.40028e-78
Body mass index (BMI)	Sex hormone-binding globulin levels	180726	rs3897102	-0.102956	0.00549797	3.03112e-78
Body mass index (BMI)	Sex hormone-binding globulin levels	180726	rs3901286	-0.102141	0.0055002	5.57919e-77
Body mass index (BMI)	Sex hormone-binding globulin levels	180726	rs3902951	-0.102507	0.00551418	3.89652e-77
Body mass index (BMI)	Sex hormone-binding globulin levels	180726	rs3935190	-0.102364	0.00551182	5.44844e-77
Body mass index (BMI)	Sex hormone-binding globulin levels	180726	rs394608	-0.1021	0.00550426	8.26092e-77
Body mass index (BMI)	Sex hormone-binding globulin levels	180726	rs40071	-0.102432	0.00552175	8.04595e-77
Body mass index (BMI)	Sex hormone-binding globulin levels	180726	rs4017425	-0.102446	0.00551244	4.28528e-77
Body mass index (BMI)	Sex hormone-binding globulin levels	180726	rs4055791	-0.102268	0.00551206	7.64708e-77
Body mass index (BMI)	Sex hormone-binding globulin levels	180726	rs406388	-0.102585	0.0055162	3.39012e-77
Body mass index (BMI)	Sex hormone-binding globulin levels	180726	rs41279738	-0.103187	0.00551098	3.15974e-78
Body mass index (BMI)	Sex hormone-binding globulin levels	180726	rs4148155	-0.102964	0.00550611	4.94875e-78
Body mass index (BMI)	Sex hormone-binding globulin levels	180726	rs4261944	-0.102571	0.00551692	3.72801e-77
Body mass index (BMI)	Sex hormone-binding globulin levels	180726	rs4267103	-0.102752	0.00551348	1.62398e-77
Body mass index (BMI)	Sex hormone-binding globulin levels	180726	rs4284600	-0.102761	0.00551301	1.53066e-77
Body mass index (BMI)	Sex hormone-binding globulin levels	180726	rs429343	-0.102373	0.00551618	6.9294e-77
Body mass index (BMI)	Sex hormone-binding globulin levels	180726	rs429358	-0.102263	0.00551527	9.51574e-77
Body mass index (BMI)	Sex hormone-binding globulin levels	180726	rs4307239	-0.102679	0.00551575	2.39852e-77
Body mass index (BMI)	Sex hormone-binding globulin levels	180726	rs4419475	-0.102437	0.00550999	3.79511e-77
Body mass index (BMI)	Sex hormone-binding globulin levels	180726	rs4444317	-0.102407	0.00551141	4.58052e-77
Body mass index (BMI)	Sex hormone-binding globulin levels	180726	rs4456769	-0.102568	0.00551725	3.8395e-77
Body mass index (BMI)	Sex hormone-binding globulin levels	180726	rs4477562	-0.102393	0.0055203	8.39744e-77
Body mass index (BMI)	Sex hormone-binding globulin levels	180726	rs4482463	-0.102036	0.00549283	5.0025e-77
Body mass index (BMI)	Sex hormone-binding globulin levels	180726	rs45486197	-0.1025	0.00551473	4.12801e-77
Body mass index (BMI)	Sex hormone-binding globulin levels	180726	rs4605363	-0.102641	0.00551908	3.37287e-77
Body mass index (BMI)	Sex hormone-binding globulin levels	180726	rs4648450	-0.102069	0.00548746	3.18377e-77
Body mass index (BMI)	Sex hormone-binding globulin levels	180726	rs4658403	-0.102669	0.00551759	2.79054e-77
Body mass index (BMI)	Sex hormone-binding globulin levels	180726	rs4672338	-0.102485	0.00551446	4.26323e-77
Body mass index (BMI)	Sex hormone-binding globulin levels	180726	rs4722398	-0.102566	0.0055165	3.69036e-77
Body mass index (BMI)	Sex hormone-binding globulin levels	180726	rs4790292	-0.102556	0.00552212	5.43388e-77
Body mass index (BMI)	Sex hormone-binding globulin levels	180726	rs4820410	-0.102391	0.0055162	6.53681e-77
Body mass index (BMI)	Sex hormone-binding globulin levels	180726	rs4832298	-0.10251	0.00551733	4.6929e-77
Body mass index (BMI)	Sex hormone-binding globulin levels	180726	rs4876611	-0.102701	0.00552071	3.04275e-77
Body mass index (BMI)	Sex hormone-binding globulin levels	180726	rs4929923	-0.102217	0.00551072	8.34474e-77
Body mass index (BMI)	Sex hormone-binding globulin levels	180726	rs5011579	-0.102617	0.00551669	3.14679e-77
Body mass index (BMI)	Sex hormone-binding globulin levels	180726	rs512121	-0.102394	0.00550918	4.16588e-77
Body mass index (BMI)	Sex hormone-binding globulin levels	180726	rs529200	-0.102727	0.00551942	2.57247e-77
Body mass index (BMI)	Sex hormone-binding globulin levels	180726	rs55726687	-0.102206	0.00551483	1.11893e-76
Body mass index (BMI)	Sex hormone-binding globulin levels	180726	rs558887	-0.102687	0.00551549	2.29991e-77
Body mass index (BMI)	Sex hormone-binding globulin levels	180726	rs559231	-0.102376	0.00550935	4.47507e-77
Body mass index (BMI)	Sex hormone-binding globulin levels	180726	rs56038322	-0.10272	0.00551546	2.05507e-77
Body mass index (BMI)	Sex hormone-binding globulin levels	180726	rs56094641	-0.103775	0.00566237	5.02267e-75
Body mass index (BMI)	Sex hormone-binding globulin levels	180726	rs56143236	-0.102213	0.00548543	1.71801e-77
Body mass index (BMI)	Sex hormone-binding globulin levels	180726	rs56203622	-0.102761	0.00551389	1.61898e-77
Body mass index (BMI)	Sex hormone-binding globulin levels	180726	rs56352336	-0.102609	0.00551605	3.10067e-77
Body mass index (BMI)	Sex hormone-binding globulin levels	180726	rs56399737	-0.102904	0.00551234	9.02634e-78
Body mass index (BMI)	Sex hormone-binding globulin levels	180726	rs56858768	-0.102576	0.00551795	3.91016e-77
Body mass index (BMI)	Sex hormone-binding globulin levels	180726	rs56893062	-0.102891	0.0055035	5.38886e-78
Body mass index (BMI)	Sex hormone-binding globulin levels	180726	rs56930105	-0.102407	0.00550703	3.48677e-77
Body mass index (BMI)	Sex hormone-binding globulin levels	180726	rs57636386	-0.103041	0.0055196	8.97555e-78
Body mass index (BMI)	Sex hormone-binding globulin levels	180726	rs58862095	-0.103424	0.00549877	6.42033e-79
Body mass index (BMI)	Sex hormone-binding globulin levels	180726	rs59068084	-0.102574	0.00551516	3.29474e-77
Body mass index (BMI)	Sex hormone-binding globulin levels	180726	rs59227842	-0.102388	0.00552225	9.66127e-77
Body mass index (BMI)	Sex hormone-binding globulin levels	180726	rs594024	-0.103299	0.00546956	1.48451e-79
Body mass index (BMI)	Sex hormone-binding globulin levels	180726	rs6023655	-0.102838	0.00550959	9.48929e-78
Body mass index (BMI)	Sex hormone-binding globulin levels	180726	rs60764613	-0.102778	0.00551572	1.71514e-77
Body mass index (BMI)	Sex hormone-binding globulin levels	180726	rs61740466	-0.102544	0.00551501	3.61988e-77
Body mass index (BMI)	Sex hormone-binding globulin levels	180726	rs61813324	-0.102737	0.00552262	3.04055e-77
Body mass index (BMI)	Sex hormone-binding globulin levels	180726	rs61828641	-0.102555	0.00551734	4.03942e-77
Body mass index (BMI)	Sex hormone-binding globulin levels	180726	rs61871615	-0.102622	0.00551843	3.4517e-77
Body mass index (BMI)	Sex hormone-binding globulin levels	180726	rs61903695	-0.102481	0.00551615	4.80757e-77
Body mass index (BMI)	Sex hormone-binding globulin levels	180726	rs61992671	-0.102446	0.00551621	5.43508e-77
Body mass index (BMI)	Sex hormone-binding globulin levels	180726	rs62007782	-0.10291	0.00550959	7.41968e-78
Body mass index (BMI)	Sex hormone-binding globulin levels	180726	rs62020775	-0.102577	0.0055156	3.35681e-77
Body mass index (BMI)	Sex hormone-binding globulin levels	180726	rs62072006	-0.102505	0.00551359	3.77399e-77
Body mass index (BMI)	Sex hormone-binding globulin levels	180726	rs62107261	-0.103806	0.0055355	1.83731e-78
Body mass index (BMI)	Sex hormone-binding globulin levels	180726	rs62176243	-0.102354	0.00550773	4.35157e-77
Body mass index (BMI)	Sex hormone-binding globulin levels	180726	rs62190049	-0.102287	0.00549469	2.39779e-77
Body mass index (BMI)	Sex hormone-binding globulin levels	180726	rs62241847	-0.102763	0.00551256	1.47942e-77
Body mass index (BMI)	Sex hormone-binding globulin levels	180726	rs62246311	-0.102424	0.00551129	4.30189e-77
Body mass index (BMI)	Sex hormone-binding globulin levels	180726	rs62379271	-0.102562	0.00551539	3.49365e-77
Body mass index (BMI)	Sex hormone-binding globulin levels	180726	rs62407562	-0.102136	0.00548501	2.17354e-77
Body mass index (BMI)	Sex hormone-binding globulin levels	180726	rs6265	-0.102011	0.005532	6.25475e-76
Body mass index (BMI)	Sex hormone-binding globulin levels	180726	rs6430068	-0.102599	0.00551589	3.17563e-77
Body mass index (BMI)	Sex hormone-binding globulin levels	180726	rs6444950	-0.102411	0.00551209	4.71792e-77
Body mass index (BMI)	Sex hormone-binding globulin levels	180726	rs6545714	-0.102686	0.00552363	3.85109e-77
Body mass index (BMI)	Sex hormone-binding globulin levels	180726	rs6560906	-0.102824	0.00550846	9.27387e-78
Body mass index (BMI)	Sex hormone-binding globulin levels	180726	rs6561937	-0.102792	0.00551394	1.4607e-77
Body mass index (BMI)	Sex hormone-binding globulin levels	180726	rs6575340	-0.102735	0.0055228	3.10053e-77
Body mass index (BMI)	Sex hormone-binding globulin levels	180726	rs66679256	-0.103037	0.00550076	2.74962e-78
Body mass index (BMI)	Sex hormone-binding globulin levels	180726	rs6669341	-0.102772	0.00551853	2.0869e-77
Body mass index (BMI)	Sex hormone-binding globulin levels	180726	rs6682438	-0.102873	0.00550723	7.26373e-78
Body mass index (BMI)	Sex hormone-binding globulin levels	180726	rs6705567	-0.101956	0.00546877	1.43222e-77
Body mass index (BMI)	Sex hormone-binding globulin levels	180726	rs6707827	-0.102873	0.00550345	5.70576e-78
Body mass index (BMI)	Sex hormone-binding globulin levels	180726	rs6710091	-0.102445	0.0055104	3.78145e-77
Body mass index (BMI)	Sex hormone-binding globulin levels	180726	rs6713781	-0.102789	0.00551347	1.4311e-77
Body mass index (BMI)	Sex hormone-binding globulin levels	180726	rs6725931	-0.102531	0.00551661	4.17605e-77
Body mass index (BMI)	Sex hormone-binding globulin levels	180726	rs6744646	-0.10375	0.0055476	4.79233e-78
Body mass index (BMI)	Sex hormone-binding globulin levels	180726	rs6752979	-0.102337	0.00550301	3.43219e-77
Body mass index (BMI)	Sex hormone-binding globulin levels	180726	rs67609008	-0.103015	0.00550437	3.72567e-78
Body mass index (BMI)	Sex hormone-binding globulin levels	180726	rs6769617	-0.102774	0.00551364	1.52267e-77
Body mass index (BMI)	Sex hormone-binding globulin levels	180726	rs6774894	-0.102186	0.00549119	2.70891e-77
Body mass index (BMI)	Sex hormone-binding globulin levels	180726	rs6777784	-0.102322	0.00550044	3.06369e-77
Body mass index (BMI)	Sex hormone-binding globulin levels	180726	rs6831088	-0.102639	0.00551558	2.72126e-77
Body mass index (BMI)	Sex hormone-binding globulin levels	180726	rs6843852	-0.102738	0.00551524	1.90379e-77
Body mass index (BMI)	Sex hormone-binding globulin levels	180726	rs6909685	-0.102126	0.00548823	2.75362e-77
Body mass index (BMI)	Sex hormone-binding globulin levels	180726	rs6922607	-0.102999	0.00549231	1.82194e-78
Body mass index (BMI)	Sex hormone-binding globulin levels	180726	rs6938973	-0.101788	0.00547249	3.21495e-77
Body mass index (BMI)	Sex hormone-binding globulin levels	180726	rs6950388	-0.10247	0.00551341	4.21043e-77
Body mass index (BMI)	Sex hormone-binding globulin levels	180726	rs6962980	-0.102428	0.00551615	5.74672e-77
Body mass index (BMI)	Sex hormone-binding globulin levels	180726	rs698147	-0.102366	0.00550805	4.26964e-77
Body mass index (BMI)	Sex hormone-binding globulin levels	180726	rs7024334	-0.102519	0.00551418	3.74129e-77
Body mass index (BMI)	Sex hormone-binding globulin levels	180726	rs7027304	-0.102967	0.00550345	4.13917e-78
Body mass index (BMI)	Sex hormone-binding globulin levels	180726	rs7034554	-0.102567	0.00551627	3.62113e-77
Body mass index (BMI)	Sex hormone-binding globulin levels	180726	rs704061	-0.102991	0.00550375	3.88415e-78
Body mass index (BMI)	Sex hormone-binding globulin levels	180726	rs7070670	-0.102595	0.00551589	3.224e-77
Body mass index (BMI)	Sex hormone-binding globulin levels	180726	rs7081254	-0.102792	0.00551101	1.21191e-77
Body mass index (BMI)	Sex hormone-binding globulin levels	180726	rs7124681	-0.102949	0.00552688	1.94141e-77
Body mass index (BMI)	Sex hormone-binding globulin levels	180726	rs7132908	-0.103006	0.00553262	2.29617e-77
Body mass index (BMI)	Sex hormone-binding globulin levels	180726	rs71495038	-0.102031	0.00548397	2.90827e-77
Body mass index (BMI)	Sex hormone-binding globulin levels	180726	rs7201895	-0.102666	0.00551769	2.83111e-77
Body mass index (BMI)	Sex hormone-binding globulin levels	180726	rs7206608	-0.102427	0.0055115	4.31048e-77
Body mass index (BMI)	Sex hormone-binding globulin levels	180726	rs7218014	-0.102796	0.00551618	1.66204e-77
Body mass index (BMI)	Sex hormone-binding globulin levels	180726	rs7232171	-0.102586	0.00551618	3.37944e-77
Body mass index (BMI)	Sex hormone-binding globulin levels	180726	rs723672	-0.102648	0.00551541	2.6091e-77
Body mass index (BMI)	Sex hormone-binding globulin levels	180726	rs7259070	-0.101973	0.0055046	1.29527e-76
Body mass index (BMI)	Sex hormone-binding globulin levels	180726	rs72634826	-0.102622	0.00552198	4.30982e-77
Body mass index (BMI)	Sex hormone-binding globulin levels	180726	rs72649373	-0.102816	0.00551065	1.09334e-77
Body mass index (BMI)	Sex hormone-binding globulin levels	180726	rs72673947	-0.1026	0.00551724	3.44226e-77
Body mass index (BMI)	Sex hormone-binding globulin levels	180726	rs72892910	-0.103075	0.00553137	1.68233e-77
Body mass index (BMI)	Sex hormone-binding globulin levels	180726	rs72976986	-0.101916	0.0054875	5.37743e-77
Body mass index (BMI)	Sex hormone-binding globulin levels	180726	rs73026725	-0.102784	0.00551727	1.84978e-77
Body mass index (BMI)	Sex hormone-binding globulin levels	180726	rs73052033	-0.103234	0.00551303	3.06616e-78
Body mass index (BMI)	Sex hormone-binding globulin levels	180726	rs7306534	-0.102883	0.00550233	5.12594e-78
Body mass index (BMI)	Sex hormone-binding globulin levels	180726	rs73124396	-0.102485	0.00551397	4.1398e-77
Body mass index (BMI)	Sex hormone-binding globulin levels	180726	rs73142879	-0.102237	0.00551736	1.18317e-76
Body mass index (BMI)	Sex hormone-binding globulin levels	180726	rs73193736	-0.102429	0.0055152	5.40397e-77
Body mass index (BMI)	Sex hormone-binding globulin levels	180726	rs73213484	-0.102513	0.00551821	4.90954e-77
Body mass index (BMI)	Sex hormone-binding globulin levels	180726	rs7331420	-0.102511	0.00551533	4.12805e-77
Body mass index (BMI)	Sex hormone-binding globulin levels	180726	rs7357754	-0.103204	0.00547905	3.81702e-79
Body mass index (BMI)	Sex hormone-binding globulin levels	180726	rs73601548	-0.102634	0.00551576	2.80078e-77
Body mass index (BMI)	Sex hormone-binding globulin levels	180726	rs73985439	-0.102808	0.00551173	1.20209e-77
Body mass index (BMI)	Sex hormone-binding globulin levels	180726	rs7442885	-0.103058	0.0055096	4.49818e-78
Body mass index (BMI)	Sex hormone-binding globulin levels	180726	rs745249	-0.102398	0.00551513	5.96594e-77
Body mass index (BMI)	Sex hormone-binding globulin levels	180726	rs74750282	-0.102571	0.00551519	3.33946e-77
Body mass index (BMI)	Sex hormone-binding globulin levels	180726	rs7498665	-0.101843	0.00551267	3.32049e-76
Body mass index (BMI)	Sex hormone-binding globulin levels	180726	rs7516554	-0.102624	0.00551613	2.96141e-77
Body mass index (BMI)	Sex hormone-binding globulin levels	180726	rs7519259	-0.1025	0.00551616	4.52071e-77
Body mass index (BMI)	Sex hormone-binding globulin levels	180726	rs754635	-0.102665	0.0055175	2.80751e-77
Body mass index (BMI)	Sex hormone-binding globulin levels	180726	rs75499503	-0.102156	0.00549611	4.09369e-77
Body mass index (BMI)	Sex hormone-binding globulin levels	180726	rs7571496	-0.102903	0.00550845	7.06906e-78
Body mass index (BMI)	Sex hormone-binding globulin levels	180726	rs76183894	-0.102365	0.00550597	3.75165e-77
Body mass index (BMI)	Sex hormone-binding globulin levels	180726	rs7619139	-0.102555	0.00551663	3.85569e-77
Body mass index (BMI)	Sex hormone-binding globulin levels	180726	rs76702514	-0.102568	0.005517	3.78145e-77
Body mass index (BMI)	Sex hormone-binding globulin levels	180726	rs7683836	-0.1025	0.00551427	4.00879e-77
Body mass index (BMI)	Sex hormone-binding globulin levels	180726	rs7708584	-0.102282	0.00550913	6.0697e-77
Body mass index (BMI)	Sex hormone-binding globulin levels	180726	rs7761673	-0.102697	0.00551465	2.10903e-77
Body mass index (BMI)	Sex hormone-binding globulin levels	180726	rs7762794	-0.102615	0.00551732	3.29204e-77
Body mass index (BMI)	Sex hormone-binding globulin levels	180726	rs7776021	-0.102518	0.00551389	3.67985e-77
Body mass index (BMI)	Sex hormone-binding globulin levels	180726	rs7802342	-0.102382	0.00550559	3.45986e-77
Body mass index (BMI)	Sex hormone-binding globulin levels	180726	rs7805441	-0.102665	0.00551695	2.71848e-77
Body mass index (BMI)	Sex hormone-binding globulin levels	180726	rs784257	-0.102717	0.00551652	2.21596e-77
Body mass index (BMI)	Sex hormone-binding globulin levels	180726	rs78605811	-0.102801	0.00551466	1.48388e-77
Body mass index (BMI)	Sex hormone-binding globulin levels	180726	rs7893571	-0.10251	0.00551576	4.25588e-77
Body mass index (BMI)	Sex hormone-binding globulin levels	180726	rs7925100	-0.102419	0.00551382	5.12539e-77
Body mass index (BMI)	Sex hormone-binding globulin levels	180726	rs7944782	-0.10283	0.00551517	1.38905e-77
Body mass index (BMI)	Sex hormone-binding globulin levels	180726	rs7947143	-0.102434	0.00551322	4.69339e-77
Body mass index (BMI)	Sex hormone-binding globulin levels	180726	rs79780963	-0.1031	0.00548499	8.02505e-79
Body mass index (BMI)	Sex hormone-binding globulin levels	180726	rs7996639	-0.1027	0.00551733	2.46862e-77
Body mass index (BMI)	Sex hormone-binding globulin levels	180726	rs80135274	-0.10269	0.00551484	2.18247e-77
Body mass index (BMI)	Sex hormone-binding globulin levels	180726	rs8020365	-0.102343	0.00552059	1.01096e-76
Body mass index (BMI)	Sex hormone-binding globulin levels	180726	rs8024137	-0.102676	0.00551516	2.34069e-77
Body mass index (BMI)	Sex hormone-binding globulin levels	180726	rs8025516	-0.102651	0.00551761	2.96507e-77
Body mass index (BMI)	Sex hormone-binding globulin levels	180726	rs8089514	-0.102377	0.00550799	4.08815e-77
Body mass index (BMI)	Sex hormone-binding globulin levels	180726	rs8112818	-0.102485	0.00552291	7.23825e-77
Body mass index (BMI)	Sex hormone-binding globulin levels	180726	rs8132491	-0.102683	0.00551714	2.5852e-77
Body mass index (BMI)	Sex hormone-binding globulin levels	180726	rs815163	-0.102702	0.00551937	2.79448e-77
Body mass index (BMI)	Sex hormone-binding globulin levels	180726	rs852042	-0.10297	0.00549371	2.19417e-78
Body mass index (BMI)	Sex hormone-binding globulin levels	180726	rs862320	-0.102252	0.00552123	1.4305e-76
Body mass index (BMI)	Sex hormone-binding globulin levels	180726	rs909892	-0.102545	0.00551577	3.7793e-77
Body mass index (BMI)	Sex hormone-binding globulin levels	180726	rs923994	-0.102527	0.00551497	3.81785e-77
Body mass index (BMI)	Sex hormone-binding globulin levels	180726	rs9267671	-0.102655	0.00551637	2.71179e-77
Body mass index (BMI)	Sex hormone-binding globulin levels	180726	rs9291822	-0.102683	0.0055174	2.63213e-77
Body mass index (BMI)	Sex hormone-binding globulin levels	180726	rs9294260	-0.102569	0.00551804	4.02626e-77
Body mass index (BMI)	Sex hormone-binding globulin levels	180726	rs9349235	-0.102707	0.00551416	1.97693e-77
Body mass index (BMI)	Sex hormone-binding globulin levels	180726	rs935166	-0.103082	0.00550139	2.45043e-78
Body mass index (BMI)	Sex hormone-binding globulin levels	180726	rs9463175	-0.102907	0.00549949	3.9522e-78
Body mass index (BMI)	Sex hormone-binding globulin levels	180726	rs9478496	-0.102576	0.00551708	3.70031e-77
Body mass index (BMI)	Sex hormone-binding globulin levels	180726	rs9515446	-0.10255	0.00551812	4.30379e-77
Body mass index (BMI)	Sex hormone-binding globulin levels	180726	rs9522180	-0.103039	0.00549751	2.21194e-78
Body mass index (BMI)	Sex hormone-binding globulin levels	180726	rs9571687	-0.102762	0.00551386	1.60676e-77
Body mass index (BMI)	Sex hormone-binding globulin levels	180726	rs9638713	-0.102343	0.00550218	3.18245e-77
Body mass index (BMI)	Sex hormone-binding globulin levels	180726	rs9673839	-0.102635	0.00551691	2.99577e-77
Body mass index (BMI)	Sex hormone-binding globulin levels	180726	rs9674487	-0.102742	0.005513	1.63346e-77
Body mass index (BMI)	Sex hormone-binding globulin levels	180726	rs9830592	-0.102649	0.00551878	3.21644e-77
Body mass index (BMI)	Sex hormone-binding globulin levels	180726	rs9839081	-0.102854	0.00550495	6.69421e-78
Body mass index (BMI)	Sex hormone-binding globulin levels	180726	rs9843653	-0.101588	0.00551	6.63861e-76
Body mass index (BMI)	Sex hormone-binding globulin levels	180726	rs9876664	-0.102656	0.00552079	3.56442e-77
Body mass index (BMI)	Sex hormone-binding globulin levels	180726	rs9888533	-0.102487	0.00551325	3.9241e-77
Body mass index (BMI)	Sex hormone-binding globulin levels	180726	rs9926784	-0.102673	0.00552169	3.55647e-77
Body mass index (BMI)	Sex hormone-binding globulin levels	180726	rs9951619	-0.102572	0.00551593	3.49347e-77
Body mass index (BMI)	Sex hormone-binding globulin levels	180726	All	-0.102619	0.00550503	1.49578e-77

## Sheet: Table S14
Supplementary Table S16: Leave one out analysis for the effect of SHBG level on BMI.
Exposure	Outcome	Samplesize	SNP	beta	se	p
Sex hormone-binding globulin levels	Body mass index (BMI)	166413	rs10027275	-0.0539224	0.0237549	0.0232106
Sex hormone-binding globulin levels	Body mass index (BMI)	166413	rs10041660	-0.0516619	0.0238589	0.0303638
Sex hormone-binding globulin levels	Body mass index (BMI)	166413	rs10107182	-0.0489805	0.0237849	0.0394648
Sex hormone-binding globulin levels	Body mass index (BMI)	166413	rs10737683	-0.049644	0.0237484	0.0365808
Sex hormone-binding globulin levels	Body mass index (BMI)	166413	rs10868080	-0.0492459	0.0240049	0.0402192
Sex hormone-binding globulin levels	Body mass index (BMI)	166413	rs10881582	-0.0514651	0.023907	0.0313405
Sex hormone-binding globulin levels	Body mass index (BMI)	166413	rs10895277	-0.0535024	0.0237285	0.0241472
Sex hormone-binding globulin levels	Body mass index (BMI)	166413	rs11075253	-0.0505522	0.0238392	0.0339593
Sex hormone-binding globulin levels	Body mass index (BMI)	166413	rs11111274	-0.0529541	0.0236957	0.0254336
Sex hormone-binding globulin levels	Body mass index (BMI)	166413	rs111752158	-0.0494087	0.0236535	0.0367208
Sex hormone-binding globulin levels	Body mass index (BMI)	166413	rs111981233	-0.050787	0.0239458	0.0339294
Sex hormone-binding globulin levels	Body mass index (BMI)	166413	rs112035922	-0.0527529	0.0237676	0.0264506
Sex hormone-binding globulin levels	Body mass index (BMI)	166413	rs113248443	-0.0506736	0.0238016	0.0332548
Sex hormone-binding globulin levels	Body mass index (BMI)	166413	rs114165349	-0.0590926	0.0240141	0.013865
Sex hormone-binding globulin levels	Body mass index (BMI)	166413	rs11564722	-0.0499263	0.0237663	0.0356655
Sex hormone-binding globulin levels	Body mass index (BMI)	166413	rs11610256	-0.0524495	0.0238007	0.027546
Sex hormone-binding globulin levels	Body mass index (BMI)	166413	rs11621792	-0.0510425	0.0239228	0.0328727
Sex hormone-binding globulin levels	Body mass index (BMI)	166413	rs116338429	-0.0522368	0.0238347	0.0284068
Sex hormone-binding globulin levels	Body mass index (BMI)	166413	rs11666245	-0.051615	0.0238548	0.0304861
Sex hormone-binding globulin levels	Body mass index (BMI)	166413	rs11734408	-0.0533476	0.023641	0.024035
Sex hormone-binding globulin levels	Body mass index (BMI)	166413	rs11739158	-0.0495143	0.0237099	0.0367672
Sex hormone-binding globulin levels	Body mass index (BMI)	166413	rs11743810	-0.048713	0.0236031	0.0390325
Sex hormone-binding globulin levels	Body mass index (BMI)	166413	rs117664177	-0.051913	0.0239009	0.0298547
Sex hormone-binding globulin levels	Body mass index (BMI)	166413	rs117734486	-0.051492	0.0238509	0.030857
Sex hormone-binding globulin levels	Body mass index (BMI)	166413	rs117921873	-0.0491039	0.0237463	0.0386532
Sex hormone-binding globulin levels	Body mass index (BMI)	166413	rs118037027	-0.0509376	0.023865	0.0328092
Sex hormone-binding globulin levels	Body mass index (BMI)	166413	rs11856926	-0.0530262	0.0238526	0.0262106
Sex hormone-binding globulin levels	Body mass index (BMI)	166413	rs11870307	-0.057374	0.0250177	0.0218289
Sex hormone-binding globulin levels	Body mass index (BMI)	166413	rs12138136	-0.0507079	0.0238483	0.0334809
Sex hormone-binding globulin levels	Body mass index (BMI)	166413	rs1229492	-0.0518911	0.0238844	0.0298113
Sex hormone-binding globulin levels	Body mass index (BMI)	166413	rs12605524	-0.049639	0.0236582	0.0358896
Sex hormone-binding globulin levels	Body mass index (BMI)	166413	rs12611046	-0.0500906	0.0237377	0.0348436
Sex hormone-binding globulin levels	Body mass index (BMI)	166413	rs12694450	-0.0517056	0.023851	0.0301699
Sex hormone-binding globulin levels	Body mass index (BMI)	166413	rs12696304	-0.0502667	0.0237825	0.034549
Sex hormone-binding globulin levels	Body mass index (BMI)	166413	rs12797706	-0.05142	0.0238911	0.0313761
Sex hormone-binding globulin levels	Body mass index (BMI)	166413	rs12953087	-0.050764	0.0238252	0.0331153
Sex hormone-binding globulin levels	Body mass index (BMI)	166413	rs12989596	-0.0521494	0.0238331	0.0286615
Sex hormone-binding globulin levels	Body mass index (BMI)	166413	rs13108218	-0.0573008	0.0239408	0.0166913
Sex hormone-binding globulin levels	Body mass index (BMI)	166413	rs13150068	-0.0489017	0.0240501	0.0420197
Sex hormone-binding globulin levels	Body mass index (BMI)	166413	rs13379043	-0.0525771	0.0237897	0.0270995
Sex hormone-binding globulin levels	Body mass index (BMI)	166413	rs1349852	-0.0540864	0.0240398	0.024457
Sex hormone-binding globulin levels	Body mass index (BMI)	166413	rs138529890	-0.0504052	0.0238468	0.0345397
Sex hormone-binding globulin levels	Body mass index (BMI)	166413	rs138611541	-0.0510223	0.0238576	0.0324666
Sex hormone-binding globulin levels	Body mass index (BMI)	166413	rs144647926	-0.0512965	0.0238555	0.0315316
Sex hormone-binding globulin levels	Body mass index (BMI)	166413	rs1538648	-0.0518737	0.0238528	0.0296492
Sex hormone-binding globulin levels	Body mass index (BMI)	166413	rs1736180	-0.048252	0.0238631	0.0431725
Sex hormone-binding globulin levels	Body mass index (BMI)	166413	rs174529	-0.0501269	0.0237732	0.0349835
Sex hormone-binding globulin levels	Body mass index (BMI)	166413	rs1782652	-0.0533161	0.0238525	0.0254015
Sex hormone-binding globulin levels	Body mass index (BMI)	166413	rs1801689	-0.0528638	0.0238646	0.0267495
Sex hormone-binding globulin levels	Body mass index (BMI)	166413	rs1860018	-0.0521121	0.0238528	0.0289083
Sex hormone-binding globulin levels	Body mass index (BMI)	166413	rs187079266	-0.0508627	0.023995	0.0340298
Sex hormone-binding globulin levels	Body mass index (BMI)	166413	rs1871395	-0.0527924	0.0241617	0.0288919
Sex hormone-binding globulin levels	Body mass index (BMI)	166413	rs187437	-0.0538549	0.0236178	0.022592
Sex hormone-binding globulin levels	Body mass index (BMI)	166413	rs2045345	-0.0509423	0.0238776	0.0328857
Sex hormone-binding globulin levels	Body mass index (BMI)	166413	rs2073503	-0.0511892	0.0238473	0.0318301
Sex hormone-binding globulin levels	Body mass index (BMI)	166413	rs2123050	-0.0509827	0.0238652	0.0326569
Sex hormone-binding globulin levels	Body mass index (BMI)	166413	rs2138161	-0.0530548	0.023877	0.0262828
Sex hormone-binding globulin levels	Body mass index (BMI)	166413	rs2239222	-0.0535802	0.0237743	0.0242146
Sex hormone-binding globulin levels	Body mass index (BMI)	166413	rs2256657	-0.0508489	0.0238768	0.0332014
Sex hormone-binding globulin levels	Body mass index (BMI)	166413	rs2259305	-0.0538072	0.0238005	0.0237738
Sex hormone-binding globulin levels	Body mass index (BMI)	166413	rs2266782	-0.0488546	0.023542	0.0379666
Sex hormone-binding globulin levels	Body mass index (BMI)	166413	rs2298058	-0.051371	0.0238926	0.0315489
Sex hormone-binding globulin levels	Body mass index (BMI)	166413	rs2301050	-0.0524448	0.0237705	0.0273628
Sex hormone-binding globulin levels	Body mass index (BMI)	166413	rs2330649	-0.0497428	0.0238011	0.0366237
Sex hormone-binding globulin levels	Body mass index (BMI)	166413	rs2351958	-0.0511034	0.0238851	0.0323909
Sex hormone-binding globulin levels	Body mass index (BMI)	166413	rs2575368	-0.0523209	0.0238004	0.0279262
Sex hormone-binding globulin levels	Body mass index (BMI)	166413	rs2612069	-0.0512116	0.0238554	0.0318133
Sex hormone-binding globulin levels	Body mass index (BMI)	166413	rs2642438	-0.0501154	0.0239186	0.0361487
Sex hormone-binding globulin levels	Body mass index (BMI)	166413	rs2694157	-0.0507661	0.0238577	0.0333478
Sex hormone-binding globulin levels	Body mass index (BMI)	166413	rs2721195	-0.0527771	0.0238645	0.0269992
Sex hormone-binding globulin levels	Body mass index (BMI)	166413	rs28773027	-0.0513189	0.0238572	0.0314695
Sex hormone-binding globulin levels	Body mass index (BMI)	166413	rs2896906	-0.0507872	0.0238427	0.0331635
Sex hormone-binding globulin levels	Body mass index (BMI)	166413	rs2905801	-0.0479206	0.0237085	0.0432548
Sex hormone-binding globulin levels	Body mass index (BMI)	166413	rs2924545	-0.052327	0.0238004	0.027908
Sex hormone-binding globulin levels	Body mass index (BMI)	166413	rs3006593	-0.0503865	0.0238037	0.0342813
Sex hormone-binding globulin levels	Body mass index (BMI)	166413	rs3173833	-0.0523945	0.0238171	0.0278159
Sex hormone-binding globulin levels	Body mass index (BMI)	166413	rs34255979	-0.05434	0.0239435	0.0232374
Sex hormone-binding globulin levels	Body mass index (BMI)	166413	rs34587839	-0.0531684	0.0237727	0.025317
Sex hormone-binding globulin levels	Body mass index (BMI)	166413	rs34869253	-0.0529964	0.023755	0.0256841
Sex hormone-binding globulin levels	Body mass index (BMI)	166413	rs35135293	-0.0520547	0.0238403	0.0290012
Sex hormone-binding globulin levels	Body mass index (BMI)	166413	rs35234337	-0.0495411	0.0236171	0.0359337
Sex hormone-binding globulin levels	Body mass index (BMI)	166413	rs35346083	-0.0501974	0.0238536	0.0353439
Sex hormone-binding globulin levels	Body mass index (BMI)	166413	rs3730393	-0.0498589	0.0237293	0.0356274
Sex hormone-binding globulin levels	Body mass index (BMI)	166413	rs3795128	-0.0529743	0.023814	0.0261149
Sex hormone-binding globulin levels	Body mass index (BMI)	166413	rs3890483	-0.0535758	0.0237946	0.0243477
Sex hormone-binding globulin levels	Body mass index (BMI)	166413	rs3891167	-0.0495593	0.0236371	0.0360226
Sex hormone-binding globulin levels	Body mass index (BMI)	166413	rs40270	-0.0502374	0.023886	0.035447
Sex hormone-binding globulin levels	Body mass index (BMI)	166413	rs4092465	-0.0515735	0.0238672	0.0307066
Sex hormone-binding globulin levels	Body mass index (BMI)	166413	rs42945	-0.0500563	0.023803	0.0354706
Sex hormone-binding globulin levels	Body mass index (BMI)	166413	rs4297769	-0.0538514	0.0238405	0.0238949
Sex hormone-binding globulin levels	Body mass index (BMI)	166413	rs4327534	-0.0518262	0.0238434	0.0297348
Sex hormone-binding globulin levels	Body mass index (BMI)	166413	rs4671607	-0.0485214	0.0238172	0.0416255
Sex hormone-binding globulin levels	Body mass index (BMI)	166413	rs4675682	-0.0516855	0.0238745	0.0303965
Sex hormone-binding globulin levels	Body mass index (BMI)	166413	rs4715316	-0.0521174	0.0238501	0.028874
Sex hormone-binding globulin levels	Body mass index (BMI)	166413	rs4719366	-0.0508078	0.0238462	0.0331179
Sex hormone-binding globulin levels	Body mass index (BMI)	166413	rs4819867	-0.0491532	0.0234639	0.0361851
Sex hormone-binding globulin levels	Body mass index (BMI)	166413	rs4841133	-0.0516476	0.023927	0.0308852
Sex hormone-binding globulin levels	Body mass index (BMI)	166413	rs4918722	-0.0482123	0.0234533	0.0398141
Sex hormone-binding globulin levels	Body mass index (BMI)	166413	rs540730	-0.0548674	0.0238269	0.021293
Sex hormone-binding globulin levels	Body mass index (BMI)	166413	rs55771168	-0.0489438	0.0234433	0.0368203
Sex hormone-binding globulin levels	Body mass index (BMI)	166413	rs55869502	-0.0535199	0.0238075	0.0245745
Sex hormone-binding globulin levels	Body mass index (BMI)	166413	rs55987409	-0.0535799	0.0236105	0.0232487
Sex hormone-binding globulin levels	Body mass index (BMI)	166413	rs56196860	-0.0526629	0.0237889	0.0268452
Sex hormone-binding globulin levels	Body mass index (BMI)	166413	rs56332871	-0.060364	0.0239487	0.011717
Sex hormone-binding globulin levels	Body mass index (BMI)	166413	rs59203582	-0.0474304	0.0236446	0.0448595
Sex hormone-binding globulin levels	Body mass index (BMI)	166413	rs6130613	-0.0512662	0.0240083	0.0327319
Sex hormone-binding globulin levels	Body mass index (BMI)	166413	rs62472728	-0.051683	0.0238647	0.0303369
Sex hormone-binding globulin levels	Body mass index (BMI)	166413	rs62618693	-0.0499047	0.0237527	0.0356395
Sex hormone-binding globulin levels	Body mass index (BMI)	166413	rs631695	-0.0572572	0.0236442	0.0154516
Sex hormone-binding globulin levels	Body mass index (BMI)	166413	rs6480299	-0.0505157	0.0238692	0.034315
Sex hormone-binding globulin levels	Body mass index (BMI)	166413	rs6532796	-0.052419	0.0240288	0.0291457
Sex hormone-binding globulin levels	Body mass index (BMI)	166413	rs6541725	-0.051772	0.0238565	0.0299959
Sex hormone-binding globulin levels	Body mass index (BMI)	166413	rs6736913	-0.0515414	0.0238814	0.0309101
Sex hormone-binding globulin levels	Body mass index (BMI)	166413	rs6758199	-0.0511652	0.023868	0.0320593
Sex hormone-binding globulin levels	Body mass index (BMI)	166413	rs6939861	-0.0499539	0.0238206	0.0359856
Sex hormone-binding globulin levels	Body mass index (BMI)	166413	rs6950023	-0.0489511	0.0241804	0.0429282
Sex hormone-binding globulin levels	Body mass index (BMI)	166413	rs7092853	-0.049626	0.0237025	0.0362866
Sex hormone-binding globulin levels	Body mass index (BMI)	166413	rs720130	-0.0515198	0.0238524	0.0307772
Sex hormone-binding globulin levels	Body mass index (BMI)	166413	rs7225349	-0.0498949	0.0238198	0.0361988
Sex hormone-binding globulin levels	Body mass index (BMI)	166413	rs72787581	-0.0498567	0.0237255	0.035606
Sex hormone-binding globulin levels	Body mass index (BMI)	166413	rs72842811	-0.0485958	0.0240714	0.0435058
Sex hormone-binding globulin levels	Body mass index (BMI)	166413	rs72929847	-0.0533333	0.0237976	0.0250185
Sex hormone-binding globulin levels	Body mass index (BMI)	166413	rs7314285	-0.0550051	0.0238144	0.0209024
Sex hormone-binding globulin levels	Body mass index (BMI)	166413	rs74551598	-0.0512576	0.0238568	0.03167
Sex hormone-binding globulin levels	Body mass index (BMI)	166413	rs75130744	-0.0505678	0.0239608	0.0348209
Sex hormone-binding globulin levels	Body mass index (BMI)	166413	rs7540115	-0.0513648	0.023859	0.0313302
Sex hormone-binding globulin levels	Body mass index (BMI)	166413	rs77483564	-0.0505324	0.0238236	0.0339126
Sex hormone-binding globulin levels	Body mass index (BMI)	166413	rs776746	-0.0493103	0.0236418	0.0370036
Sex hormone-binding globulin levels	Body mass index (BMI)	166413	rs7773423	-0.0512943	0.0238594	0.0315665
Sex hormone-binding globulin levels	Body mass index (BMI)	166413	rs7860634	-0.0506762	0.023909	0.0340439
Sex hormone-binding globulin levels	Body mass index (BMI)	166413	rs78679318	-0.0507634	0.0238298	0.033151
Sex hormone-binding globulin levels	Body mass index (BMI)	166413	rs78890745	-0.0496956	0.0237482	0.0363845
Sex hormone-binding globulin levels	Body mass index (BMI)	166413	rs7920217	-0.0518366	0.0238563	0.0297903
Sex hormone-binding globulin levels	Body mass index (BMI)	166413	rs79717793	-0.0470178	0.0238461	0.048642
Sex hormone-binding globulin levels	Body mass index (BMI)	166413	rs79760705	-0.0544754	0.0236875	0.0214623
Sex hormone-binding globulin levels	Body mass index (BMI)	166413	rs820503	-0.052866	0.0237651	0.0261133
Sex hormone-binding globulin levels	Body mass index (BMI)	166413	rs876435	-0.0509415	0.0238476	0.0326692
Sex hormone-binding globulin levels	Body mass index (BMI)	166413	rs9288177	-0.0510984	0.0238694	0.0322941
Sex hormone-binding globulin levels	Body mass index (BMI)	166413	rs9379084	-0.0497741	0.0237951	0.0364584
Sex hormone-binding globulin levels	Body mass index (BMI)	166413	rs9492	-0.0499702	0.0237134	0.0350954
Sex hormone-binding globulin levels	Body mass index (BMI)	166413	rs9697210	-0.0517206	0.0239342	0.0306993
Sex hormone-binding globulin levels	Body mass index (BMI)	166413	rs9739640	-0.0487099	0.0234379	0.0376863
Sex hormone-binding globulin levels	Body mass index (BMI)	166413	All	-0.0514377	0.0237423	0.0302728

## Sheet: Table S15
Supplementary Table S17: Leave one out analysis for the effect of SHBG level on BioT level.
Exposure	Outcome	Samplesize	SNP	beta	se	p
Sex hormone-binding globulin levels	Bioavailable testosterone levels	178782	rs10027275	-0.125257	0.0253274	7.59444e-07
Sex hormone-binding globulin levels	Bioavailable testosterone levels	178782	rs10041660	-0.126174	0.0253146	6.22041e-07
Sex hormone-binding globulin levels	Bioavailable testosterone levels	178782	rs10107182	-0.124571	0.0253015	8.50211e-07
Sex hormone-binding globulin levels	Bioavailable testosterone levels	178782	rs1037169	-0.124588	0.0252843	8.32862e-07
Sex hormone-binding globulin levels	Bioavailable testosterone levels	178782	rs10733789	-0.132014	0.0260676	4.09925e-07
Sex hormone-binding globulin levels	Bioavailable testosterone levels	178782	rs10737683	-0.123731	0.0251004	8.2455e-07
Sex hormone-binding globulin levels	Bioavailable testosterone levels	178782	rs10868080	-0.127958	0.0253916	4.67002e-07
Sex hormone-binding globulin levels	Bioavailable testosterone levels	178782	rs10871777	-0.125811	0.0253212	6.74356e-07
Sex hormone-binding globulin levels	Bioavailable testosterone levels	178782	rs10881582	-0.126252	0.0253428	6.30067e-07
Sex hormone-binding globulin levels	Bioavailable testosterone levels	178782	rs10895277	-0.125022	0.0252918	7.68668e-07
Sex hormone-binding globulin levels	Bioavailable testosterone levels	178782	rs11075253	-0.126247	0.0253191	6.15682e-07
Sex hormone-binding globulin levels	Bioavailable testosterone levels	178782	rs11111274	-0.125253	0.0252721	7.19007e-07
Sex hormone-binding globulin levels	Bioavailable testosterone levels	178782	rs11158976	-0.127099	0.0252306	4.71675e-07
Sex hormone-binding globulin levels	Bioavailable testosterone levels	178782	rs11159347	-0.124226	0.0252327	8.5134e-07
Sex hormone-binding globulin levels	Bioavailable testosterone levels	178782	rs111752158	-0.125397	0.0252987	7.17148e-07
Sex hormone-binding globulin levels	Bioavailable testosterone levels	178782	rs111981233	-0.126636	0.0253649	5.95832e-07
Sex hormone-binding globulin levels	Bioavailable testosterone levels	178782	rs112035922	-0.125264	0.025287	7.28289e-07
Sex hormone-binding globulin levels	Bioavailable testosterone levels	178782	rs113248443	-0.126002	0.0253094	6.40889e-07
Sex hormone-binding globulin levels	Bioavailable testosterone levels	178782	rs114165349	-0.127137	0.0255508	6.49644e-07
Sex hormone-binding globulin levels	Bioavailable testosterone levels	178782	rs114949263	-0.128917	0.0251415	2.93367e-07
Sex hormone-binding globulin levels	Bioavailable testosterone levels	178782	rs115276619	-0.125094	0.0252651	7.37392e-07
Sex hormone-binding globulin levels	Bioavailable testosterone levels	178782	rs1154988	-0.124281	0.0254856	1.07976e-06
Sex hormone-binding globulin levels	Bioavailable testosterone levels	178782	rs11564722	-0.127408	0.0252138	4.34681e-07
Sex hormone-binding globulin levels	Bioavailable testosterone levels	178782	rs11610256	-0.12512	0.0252689	7.36305e-07
Sex hormone-binding globulin levels	Bioavailable testosterone levels	178782	rs11621792	-0.124913	0.0253339	8.19494e-07
Sex hormone-binding globulin levels	Bioavailable testosterone levels	178782	rs116338429	-0.126274	0.0253085	6.05685e-07
Sex hormone-binding globulin levels	Bioavailable testosterone levels	178782	rs11666245	-0.126329	0.0253052	5.969e-07
Sex hormone-binding globulin levels	Bioavailable testosterone levels	178782	rs11734408	-0.125162	0.0252707	7.3132e-07
Sex hormone-binding globulin levels	Bioavailable testosterone levels	178782	rs11739158	-0.125538	0.0253125	7.06696e-07
Sex hormone-binding globulin levels	Bioavailable testosterone levels	178782	rs11743810	-0.128702	0.0250088	2.65723e-07
Sex hormone-binding globulin levels	Bioavailable testosterone levels	178782	rs117664177	-0.12669	0.0253284	5.67735e-07
Sex hormone-binding globulin levels	Bioavailable testosterone levels	178782	rs117734486	-0.126909	0.0252362	4.93441e-07
Sex hormone-binding globulin levels	Bioavailable testosterone levels	178782	rs117921873	-0.126185	0.025335	6.33683e-07
Sex hormone-binding globulin levels	Bioavailable testosterone levels	178782	rs118037027	-0.125256	0.0253032	7.41408e-07
Sex hormone-binding globulin levels	Bioavailable testosterone levels	178782	rs11856926	-0.126747	0.0253305	5.62372e-07
Sex hormone-binding globulin levels	Bioavailable testosterone levels	178782	rs11870307	-0.122051	0.0260111	2.70164e-06
Sex hormone-binding globulin levels	Bioavailable testosterone levels	178782	rs12138136	-0.125978	0.0253232	6.53051e-07
Sex hormone-binding globulin levels	Bioavailable testosterone levels	178782	rs1229492	-0.126126	0.0253341	6.40802e-07
Sex hormone-binding globulin levels	Bioavailable testosterone levels	178782	rs12543287	-0.126784	0.0253141	5.48765e-07
Sex hormone-binding globulin levels	Bioavailable testosterone levels	178782	rs1260326	-0.119784	0.0257527	3.29856e-06
Sex hormone-binding globulin levels	Bioavailable testosterone levels	178782	rs12605524	-0.125297	0.0252825	7.20026e-07
Sex hormone-binding globulin levels	Bioavailable testosterone levels	178782	rs12611046	-0.125955	0.025313	6.49464e-07
Sex hormone-binding globulin levels	Bioavailable testosterone levels	178782	rs12694450	-0.126164	0.0253083	6.19324e-07
Sex hormone-binding globulin levels	Bioavailable testosterone levels	178782	rs12696304	-0.126472	0.0252991	5.7612e-07
Sex hormone-binding globulin levels	Bioavailable testosterone levels	178782	rs12797706	-0.12678	0.0253139	5.49114e-07
Sex hormone-binding globulin levels	Bioavailable testosterone levels	178782	rs12950562	-0.125481	0.0253329	7.29711e-07
Sex hormone-binding globulin levels	Bioavailable testosterone levels	178782	rs12953087	-0.125129	0.0252609	7.28999e-07
Sex hormone-binding globulin levels	Bioavailable testosterone levels	178782	rs12989596	-0.125016	0.0252573	7.43275e-07
Sex hormone-binding globulin levels	Bioavailable testosterone levels	178782	rs13108218	-0.125866	0.0254844	7.85507e-07
Sex hormone-binding globulin levels	Bioavailable testosterone levels	178782	rs13150068	-0.129542	0.0253583	3.24759e-07
Sex hormone-binding globulin levels	Bioavailable testosterone levels	178782	rs13379043	-0.125824	0.025315	6.68418e-07
Sex hormone-binding globulin levels	Bioavailable testosterone levels	178782	rs138611541	-0.125871	0.0253194	6.64932e-07
Sex hormone-binding globulin levels	Bioavailable testosterone levels	178782	rs138820	-0.125913	0.0253122	6.54472e-07
Sex hormone-binding globulin levels	Bioavailable testosterone levels	178782	rs1415293	-0.125482	0.0252983	7.04618e-07
Sex hormone-binding globulin levels	Bioavailable testosterone levels	178782	rs144647926	-0.126277	0.0253077	6.04871e-07
Sex hormone-binding globulin levels	Bioavailable testosterone levels	178782	rs149131600	-0.130156	0.0251488	2.27384e-07
Sex hormone-binding globulin levels	Bioavailable testosterone levels	178782	rs150844304	-0.121247	0.0253683	1.75756e-06
Sex hormone-binding globulin levels	Bioavailable testosterone levels	178782	rs1538648	-0.124881	0.0252499	7.58267e-07
Sex hormone-binding globulin levels	Bioavailable testosterone levels	178782	rs157935	-0.124588	0.0252919	8.39342e-07
Sex hormone-binding globulin levels	Bioavailable testosterone levels	178782	rs1730865	-0.119979	0.0253356	2.18409e-06
Sex hormone-binding globulin levels	Bioavailable testosterone levels	178782	rs1736180	-0.126923	0.0253781	5.69455e-07
Sex hormone-binding globulin levels	Bioavailable testosterone levels	178782	rs174529	-0.126774	0.0252789	5.30286e-07
Sex hormone-binding globulin levels	Bioavailable testosterone levels	178782	rs17580	-0.127284	0.0253271	5.01806e-07
Sex hormone-binding globulin levels	Bioavailable testosterone levels	178782	rs1776899	-0.124928	0.0252617	7.59983e-07
Sex hormone-binding globulin levels	Bioavailable testosterone levels	178782	rs1782652	-0.123864	0.0252547	9.36283e-07
Sex hormone-binding globulin levels	Bioavailable testosterone levels	178782	rs1801689	-0.123199	0.0251509	9.66128e-07
Sex hormone-binding globulin levels	Bioavailable testosterone levels	178782	rs1860018	-0.12623	0.0253199	6.18275e-07
Sex hormone-binding globulin levels	Bioavailable testosterone levels	178782	rs187079266	-0.125349	0.0253987	8.00456e-07
Sex hormone-binding globulin levels	Bioavailable testosterone levels	178782	rs1871395	-0.125917	0.0255055	7.93951e-07
Sex hormone-binding globulin levels	Bioavailable testosterone levels	178782	rs187437	-0.125127	0.0252871	7.4883e-07
Sex hormone-binding globulin levels	Bioavailable testosterone levels	178782	rs202200760	-0.125358	0.0255369	9.15885e-07
Sex hormone-binding globulin levels	Bioavailable testosterone levels	178782	rs2045345	-0.126594	0.0253124	5.69529e-07
Sex hormone-binding globulin levels	Bioavailable testosterone levels	178782	rs2073503	-0.126492	0.0252882	5.67355e-07
Sex hormone-binding globulin levels	Bioavailable testosterone levels	178782	rs2239222	-0.128021	0.0252099	3.81059e-07
Sex hormone-binding globulin levels	Bioavailable testosterone levels	178782	rs2256657	-0.124101	0.025215	8.57886e-07
Sex hormone-binding globulin levels	Bioavailable testosterone levels	178782	rs2259305	-0.125759	0.0253487	7.0076e-07
Sex hormone-binding globulin levels	Bioavailable testosterone levels	178782	rs2266782	-0.125625	0.0253123	6.94091e-07
Sex hormone-binding globulin levels	Bioavailable testosterone levels	178782	rs2298058	-0.125528	0.0253304	7.20872e-07
Sex hormone-binding globulin levels	Bioavailable testosterone levels	178782	rs2301050	-0.125638	0.0253004	6.83929e-07
Sex hormone-binding globulin levels	Bioavailable testosterone levels	178782	rs2330649	-0.126161	0.025331	6.3426e-07
Sex hormone-binding globulin levels	Bioavailable testosterone levels	178782	rs2351958	-0.128887	0.0250465	2.6624e-07
Sex hormone-binding globulin levels	Bioavailable testosterone levels	178782	rs2575368	-0.127246	0.0251837	4.35583e-07
Sex hormone-binding globulin levels	Bioavailable testosterone levels	178782	rs2612069	-0.127931	0.0250583	3.30204e-07
Sex hormone-binding globulin levels	Bioavailable testosterone levels	178782	rs2642438	-0.126641	0.02536	5.92272e-07
Sex hormone-binding globulin levels	Bioavailable testosterone levels	178782	rs2694157	-0.12461	0.025246	7.98108e-07
Sex hormone-binding globulin levels	Bioavailable testosterone levels	178782	rs2721195	-0.127087	0.025311	5.13969e-07
Sex hormone-binding globulin levels	Bioavailable testosterone levels	178782	rs28394864	-0.12859	0.025601	5.09177e-07
Sex hormone-binding globulin levels	Bioavailable testosterone levels	178782	rs28507491	-0.122721	0.0251765	1.09133e-06
Sex hormone-binding globulin levels	Bioavailable testosterone levels	178782	rs28549287	-0.123755	0.0251755	8.84625e-07
Sex hormone-binding globulin levels	Bioavailable testosterone levels	178782	rs28601761	-0.126938	0.0252316	4.882e-07
Sex hormone-binding globulin levels	Bioavailable testosterone levels	178782	rs2862954	-0.125426	0.025333	7.38e-07
Sex hormone-binding globulin levels	Bioavailable testosterone levels	178782	rs2872881	-0.126899	0.0252752	5.14892e-07
Sex hormone-binding globulin levels	Bioavailable testosterone levels	178782	rs28773027	-0.125901	0.025315	6.57956e-07
Sex hormone-binding globulin levels	Bioavailable testosterone levels	178782	rs28929474	-0.12525	0.0258772	1.29736e-06
Sex hormone-binding globulin levels	Bioavailable testosterone levels	178782	rs2896906	-0.127387	0.0252042	4.32216e-07
Sex hormone-binding globulin levels	Bioavailable testosterone levels	178782	rs2905801	-0.128966	0.0251759	3.01362e-07
Sex hormone-binding globulin levels	Bioavailable testosterone levels	178782	rs2914233	-0.124681	0.0252007	7.51659e-07
Sex hormone-binding globulin levels	Bioavailable testosterone levels	178782	rs2924545	-0.124933	0.0252301	7.35562e-07
Sex hormone-binding globulin levels	Bioavailable testosterone levels	178782	rs2989330	-0.12652	0.0252938	5.67352e-07
Sex hormone-binding globulin levels	Bioavailable testosterone levels	178782	rs3006593	-0.125212	0.0252833	7.33224e-07
Sex hormone-binding globulin levels	Bioavailable testosterone levels	178782	rs3173833	-0.12691	0.0252668	5.09307e-07
Sex hormone-binding globulin levels	Bioavailable testosterone levels	178782	rs34255979	-0.126795	0.025407	6.02084e-07
Sex hormone-binding globulin levels	Bioavailable testosterone levels	178782	rs34415062	-0.12434	0.0251187	7.41696e-07
Sex hormone-binding globulin levels	Bioavailable testosterone levels	178782	rs34587839	-0.12344	0.0250702	8.48925e-07
Sex hormone-binding globulin levels	Bioavailable testosterone levels	178782	rs34858588	-0.128528	0.0250196	2.79005e-07
Sex hormone-binding globulin levels	Bioavailable testosterone levels	178782	rs34869253	-0.125531	0.0253102	7.05926e-07
Sex hormone-binding globulin levels	Bioavailable testosterone levels	178782	rs35135293	-0.127339	0.0252012	4.3518e-07
Sex hormone-binding globulin levels	Bioavailable testosterone levels	178782	rs35234337	-0.12675	0.0252663	5.25972e-07
Sex hormone-binding globulin levels	Bioavailable testosterone levels	178782	rs35346083	-0.12628	0.0253341	6.20908e-07
Sex hormone-binding globulin levels	Bioavailable testosterone levels	178782	rs36086195	-0.12217	0.0252276	1.28084e-06
Sex hormone-binding globulin levels	Bioavailable testosterone levels	178782	rs3730393	-0.124742	0.0252249	7.6062e-07
Sex hormone-binding globulin levels	Bioavailable testosterone levels	178782	rs3768321	-0.128207	0.0252445	3.80228e-07
Sex hormone-binding globulin levels	Bioavailable testosterone levels	178782	rs3795128	-0.128017	0.0251844	3.71151e-07
Sex hormone-binding globulin levels	Bioavailable testosterone levels	178782	rs3890483	-0.123857	0.0252222	9.07891e-07
Sex hormone-binding globulin levels	Bioavailable testosterone levels	178782	rs3891167	-0.127176	0.0252097	4.54135e-07
Sex hormone-binding globulin levels	Bioavailable testosterone levels	178782	rs40270	-0.124251	0.0252809	8.88723e-07
Sex hormone-binding globulin levels	Bioavailable testosterone levels	178782	rs4092465	-0.12647	0.0253084	5.81821e-07
Sex hormone-binding globulin levels	Bioavailable testosterone levels	178782	rs42945	-0.126659	0.0253043	5.57339e-07
Sex hormone-binding globulin levels	Bioavailable testosterone levels	178782	rs4297769	-0.125977	0.0253631	6.80136e-07
Sex hormone-binding globulin levels	Bioavailable testosterone levels	178782	rs4327534	-0.126164	0.0253092	6.19897e-07
Sex hormone-binding globulin levels	Bioavailable testosterone levels	178782	rs4675682	-0.125785	0.025325	6.80527e-07
Sex hormone-binding globulin levels	Bioavailable testosterone levels	178782	rs4719366	-0.124632	0.0252226	7.76164e-07
Sex hormone-binding globulin levels	Bioavailable testosterone levels	178782	rs4819867	-0.125817	0.0253091	6.65339e-07
Sex hormone-binding globulin levels	Bioavailable testosterone levels	178782	rs4841133	-0.12567	0.0253557	7.18518e-07
Sex hormone-binding globulin levels	Bioavailable testosterone levels	178782	rs4918722	-0.126403	0.0253145	5.93546e-07
Sex hormone-binding globulin levels	Bioavailable testosterone levels	178782	rs540730	-0.126233	0.0253842	6.59552e-07
Sex hormone-binding globulin levels	Bioavailable testosterone levels	178782	rs55729432	-0.124935	0.0252862	7.77855e-07
Sex hormone-binding globulin levels	Bioavailable testosterone levels	178782	rs55869502	-0.127427	0.0252889	4.68315e-07
Sex hormone-binding globulin levels	Bioavailable testosterone levels	178782	rs55987409	-0.124898	0.0252459	7.52613e-07
Sex hormone-binding globulin levels	Bioavailable testosterone levels	178782	rs56077345	-0.12505	0.0252576	7.38435e-07
Sex hormone-binding globulin levels	Bioavailable testosterone levels	178782	rs56332871	-0.126317	0.0255644	7.76744e-07
Sex hormone-binding globulin levels	Bioavailable testosterone levels	178782	rs57158761	-0.125725	0.0253081	6.77189e-07
Sex hormone-binding globulin levels	Bioavailable testosterone levels	178782	rs58414555	-0.126667	0.02528	5.42686e-07
Sex hormone-binding globulin levels	Bioavailable testosterone levels	178782	rs59203582	-0.125093	0.0253423	7.96959e-07
Sex hormone-binding globulin levels	Bioavailable testosterone levels	178782	rs60018147	-0.125926	0.0253213	6.588e-07
Sex hormone-binding globulin levels	Bioavailable testosterone levels	178782	rs6005840	-0.124079	0.025345	9.80005e-07
Sex hormone-binding globulin levels	Bioavailable testosterone levels	178782	rs6130613	-0.128541	0.0253322	3.89117e-07
Sex hormone-binding globulin levels	Bioavailable testosterone levels	178782	rs61686644	-0.12591	0.0253243	6.62978e-07
Sex hormone-binding globulin levels	Bioavailable testosterone levels	178782	rs62011286	-0.129969	0.0249781	1.9575e-07
Sex hormone-binding globulin levels	Bioavailable testosterone levels	178782	rs62259939	-0.124666	0.0252587	7.99155e-07
Sex hormone-binding globulin levels	Bioavailable testosterone levels	178782	rs624319	-0.122693	0.0252293	1.15561e-06
Sex hormone-binding globulin levels	Bioavailable testosterone levels	178782	rs62472728	-0.125302	0.0252982	7.30721e-07
Sex hormone-binding globulin levels	Bioavailable testosterone levels	178782	rs62618693	-0.125833	0.0253184	6.6944e-07
Sex hormone-binding globulin levels	Bioavailable testosterone levels	178782	rs631695	-0.124434	0.0253737	9.38775e-07
Sex hormone-binding globulin levels	Bioavailable testosterone levels	178782	rs6422513	-0.129048	0.0250557	2.59859e-07
Sex hormone-binding globulin levels	Bioavailable testosterone levels	178782	rs6480299	-0.128146	0.0251867	3.62168e-07
Sex hormone-binding globulin levels	Bioavailable testosterone levels	178782	rs6532796	-0.122048	0.0252732	1.37131e-06
Sex hormone-binding globulin levels	Bioavailable testosterone levels	178782	rs6541725	-0.126565	0.0252964	5.63597e-07
Sex hormone-binding globulin levels	Bioavailable testosterone levels	178782	rs6717858	-0.124347	0.0252725	8.64279e-07
Sex hormone-binding globulin levels	Bioavailable testosterone levels	178782	rs6736913	-0.126303	0.0253263	6.13172e-07
Sex hormone-binding globulin levels	Bioavailable testosterone levels	178782	rs6758199	-0.12731	0.0252381	4.55004e-07
Sex hormone-binding globulin levels	Bioavailable testosterone levels	178782	rs6792725	-0.126286	0.0253374	6.22203e-07
Sex hormone-binding globulin levels	Bioavailable testosterone levels	178782	rs6900473	-0.12542	0.0253074	7.20114e-07
Sex hormone-binding globulin levels	Bioavailable testosterone levels	178782	rs6939861	-0.12837	0.0251331	3.26261e-07
Sex hormone-binding globulin levels	Bioavailable testosterone levels	178782	rs6950023	-0.130922	0.025397	2.53628e-07
Sex hormone-binding globulin levels	Bioavailable testosterone levels	178782	rs7085615	-0.128203	0.0253814	4.39365e-07
Sex hormone-binding globulin levels	Bioavailable testosterone levels	178782	rs7092853	-0.127612	0.0251667	3.96431e-07
Sex hormone-binding globulin levels	Bioavailable testosterone levels	178782	rs7127472	-0.126717	0.0252816	5.38067e-07
Sex hormone-binding globulin levels	Bioavailable testosterone levels	178782	rs71480542	-0.125811	0.0253101	6.6687e-07
Sex hormone-binding globulin levels	Bioavailable testosterone levels	178782	rs7177179	-0.124574	0.0251794	7.51867e-07
Sex hormone-binding globulin levels	Bioavailable testosterone levels	178782	rs720130	-0.124361	0.0251065	7.29526e-07
Sex hormone-binding globulin levels	Bioavailable testosterone levels	178782	rs7225349	-0.12724	0.0252791	4.81845e-07
Sex hormone-binding globulin levels	Bioavailable testosterone levels	178782	rs72666817	-0.128078	0.0250478	3.16472e-07
Sex hormone-binding globulin levels	Bioavailable testosterone levels	178782	rs72683923	-0.126875	0.0252988	5.30178e-07
Sex hormone-binding globulin levels	Bioavailable testosterone levels	178782	rs72787581	-0.126917	0.0252611	5.05493e-07
Sex hormone-binding globulin levels	Bioavailable testosterone levels	178782	rs72842811	-0.128145	0.0254458	4.7538e-07
Sex hormone-binding globulin levels	Bioavailable testosterone levels	178782	rs72929847	-0.12735	0.0252785	4.70697e-07
Sex hormone-binding globulin levels	Bioavailable testosterone levels	178782	rs72948115	-0.126653	0.0252857	5.47446e-07
Sex hormone-binding globulin levels	Bioavailable testosterone levels	178782	rs7314285	-0.124307	0.0253449	9.35996e-07
Sex hormone-binding globulin levels	Bioavailable testosterone levels	178782	rs731839	-0.125834	0.0253107	6.64128e-07
Sex hormone-binding globulin levels	Bioavailable testosterone levels	178782	rs738409	-0.130154	0.0254585	3.18123e-07
Sex hormone-binding globulin levels	Bioavailable testosterone levels	178782	rs74551598	-0.125187	0.0252765	7.31961e-07
Sex hormone-binding globulin levels	Bioavailable testosterone levels	178782	rs75130744	-0.125717	0.0253838	7.32089e-07
Sex hormone-binding globulin levels	Bioavailable testosterone levels	178782	rs7540115	-0.126025	0.0253156	6.41904e-07
Sex hormone-binding globulin levels	Bioavailable testosterone levels	178782	rs75631642	-0.126599	0.0252855	5.53458e-07
Sex hormone-binding globulin levels	Bioavailable testosterone levels	178782	rs77483564	-0.12641	0.0253072	5.88322e-07
Sex hormone-binding globulin levels	Bioavailable testosterone levels	178782	rs776746	-0.126582	0.0252968	5.61941e-07
Sex hormone-binding globulin levels	Bioavailable testosterone levels	178782	rs7773423	-0.126462	0.0253014	5.78667e-07
Sex hormone-binding globulin levels	Bioavailable testosterone levels	178782	rs7860634	-0.123353	0.0252018	9.84984e-07
Sex hormone-binding globulin levels	Bioavailable testosterone levels	178782	rs78679318	-0.126255	0.0253086	6.08057e-07
Sex hormone-binding globulin levels	Bioavailable testosterone levels	178782	rs78890745	-0.124839	0.0252645	7.76024e-07
Sex hormone-binding globulin levels	Bioavailable testosterone levels	178782	rs7920217	-0.125116	0.025279	7.44343e-07
Sex hormone-binding globulin levels	Bioavailable testosterone levels	178782	rs79287178	-0.123145	0.0252128	1.03846e-06
Sex hormone-binding globulin levels	Bioavailable testosterone levels	178782	rs79391862	-0.129466	0.025399	3.44538e-07
Sex hormone-binding globulin levels	Bioavailable testosterone levels	178782	rs7970695	-0.121724	0.0252624	1.44725e-06
Sex hormone-binding globulin levels	Bioavailable testosterone levels	178782	rs79717793	-0.129397	0.0252942	3.12614e-07
Sex hormone-binding globulin levels	Bioavailable testosterone levels	178782	rs79760705	-0.125363	0.0253334	7.47793e-07
Sex hormone-binding globulin levels	Bioavailable testosterone levels	178782	rs8071650	-0.12584	0.0253224	6.71243e-07
Sex hormone-binding globulin levels	Bioavailable testosterone levels	178782	rs816040	-0.127121	0.0252391	4.73716e-07
Sex hormone-binding globulin levels	Bioavailable testosterone levels	178782	rs820503	-0.124491	0.0251978	7.79019e-07
Sex hormone-binding globulin levels	Bioavailable testosterone levels	178782	rs838716	-0.125621	0.0253053	6.8985e-07
Sex hormone-binding globulin levels	Bioavailable testosterone levels	178782	rs849135	-0.126558	0.02532	5.78224e-07
Sex hormone-binding globulin levels	Bioavailable testosterone levels	178782	rs876435	-0.126795	0.0252747	5.25792e-07
Sex hormone-binding globulin levels	Bioavailable testosterone levels	178782	rs9265285	-0.122864	0.0250757	9.5967e-07
Sex hormone-binding globulin levels	Bioavailable testosterone levels	178782	rs9288177	-0.126943	0.0252824	5.14015e-07
Sex hormone-binding globulin levels	Bioavailable testosterone levels	178782	rs9304665	-0.127412	0.0251581	4.09547e-07
Sex hormone-binding globulin levels	Bioavailable testosterone levels	178782	rs9379084	-0.124605	0.0252628	8.1251e-07
Sex hormone-binding globulin levels	Bioavailable testosterone levels	178782	rs9461224	-0.125923	0.0253393	6.71407e-07
Sex hormone-binding globulin levels	Bioavailable testosterone levels	178782	rs9492	-0.124568	0.0251656	7.42482e-07
Sex hormone-binding globulin levels	Bioavailable testosterone levels	178782	rs9697210	-0.124012	0.0252896	9.40657e-07
Sex hormone-binding globulin levels	Bioavailable testosterone levels	178782	rs9739640	-0.126178	0.0253115	6.19547e-07
Sex hormone-binding globulin levels	Bioavailable testosterone levels	178782	All	-0.125965	0.0252327	5.97098e-07

## Sheet: Table S16
Supplementary Table S18: Leave one out analysis for the effect of SHBG level on estradiol level.
Exposure	Outcome	Samplesize	SNP	beta	se	p
Sex hormone-binding globulin levels	Estradiol levels	206927	rs10027275	0.0458732	0.00549114	6.59643e-17
Sex hormone-binding globulin levels	Estradiol levels	206927	rs10041660	0.0458169	0.00548659	6.78568e-17
Sex hormone-binding globulin levels	Estradiol levels	206927	rs10107182	0.0453648	0.00548177	1.27839e-16
Sex hormone-binding globulin levels	Estradiol levels	206927	rs1037169	0.0458272	0.00549221	7.17966e-17
Sex hormone-binding globulin levels	Estradiol levels	206927	rs10733789	0.0442136	0.00563976	4.51882e-15
Sex hormone-binding globulin levels	Estradiol levels	206927	rs10737683	0.046074	0.00546466	3.41939e-17
Sex hormone-binding globulin levels	Estradiol levels	206927	rs10868080	0.0450952	0.00549531	2.28443e-16
Sex hormone-binding globulin levels	Estradiol levels	206927	rs10871777	0.0457516	0.00549007	7.84727e-17
Sex hormone-binding globulin levels	Estradiol levels	206927	rs10881582	0.045278	0.0054719	1.28834e-16
Sex hormone-binding globulin levels	Estradiol levels	206927	rs10895277	0.045639	0.00549013	9.33759e-17
Sex hormone-binding globulin levels	Estradiol levels	206927	rs11075253	0.0452445	0.0054416	9.20835e-17
Sex hormone-binding globulin levels	Estradiol levels	206927	rs11111274	0.0452111	0.00539395	5.21171e-17
Sex hormone-binding globulin levels	Estradiol levels	206927	rs11158976	0.0455115	0.00547571	9.44777e-17
Sex hormone-binding globulin levels	Estradiol levels	206927	rs11159347	0.0460364	0.00547718	4.27384e-17
Sex hormone-binding globulin levels	Estradiol levels	206927	rs111752158	0.0455473	0.00548133	9.60759e-17
Sex hormone-binding globulin levels	Estradiol levels	206927	rs111981233	0.0459947	0.00549489	5.74035e-17
Sex hormone-binding globulin levels	Estradiol levels	206927	rs112035922	0.0456479	0.00548771	8.92988e-17
Sex hormone-binding globulin levels	Estradiol levels	206927	rs113248443	0.0457069	0.00548753	8.13692e-17
Sex hormone-binding globulin levels	Estradiol levels	206927	rs114165349	0.0455368	0.00553795	1.98998e-16
Sex hormone-binding globulin levels	Estradiol levels	206927	rs114949263	0.0459714	0.00548883	5.50116e-17
Sex hormone-binding globulin levels	Estradiol levels	206927	rs115276619	0.0460601	0.00545354	3.01686e-17
Sex hormone-binding globulin levels	Estradiol levels	206927	rs1154988	0.0474521	0.00544245	2.8097e-18
Sex hormone-binding globulin levels	Estradiol levels	206927	rs11564722	0.0456815	0.00548956	8.68433e-17
Sex hormone-binding globulin levels	Estradiol levels	206927	rs11610256	0.0457735	0.00548793	7.38132e-17
Sex hormone-binding globulin levels	Estradiol levels	206927	rs11621792	0.0449099	0.00543472	1.41446e-16
Sex hormone-binding globulin levels	Estradiol levels	206927	rs116338429	0.04583	0.00548494	6.51002e-17
Sex hormone-binding globulin levels	Estradiol levels	206927	rs11666245	0.0454013	0.00545654	8.75764e-17
Sex hormone-binding globulin levels	Estradiol levels	206927	rs11734408	0.0458337	0.00548455	6.44023e-17
Sex hormone-binding globulin levels	Estradiol levels	206927	rs11739158	0.045648	0.00548894	9.07014e-17
Sex hormone-binding globulin levels	Estradiol levels	206927	rs11743810	0.045314	0.00545917	1.0365e-16
Sex hormone-binding globulin levels	Estradiol levels	206927	rs117664177	0.0453614	0.00547854	1.23334e-16
Sex hormone-binding globulin levels	Estradiol levels	206927	rs117734486	0.0456184	0.005484	8.91153e-17
Sex hormone-binding globulin levels	Estradiol levels	206927	rs117921873	0.0455176	0.00548741	1.08657e-16
Sex hormone-binding globulin levels	Estradiol levels	206927	rs118037027	0.0457308	0.00549075	8.17324e-17
Sex hormone-binding globulin levels	Estradiol levels	206927	rs11856926	0.0455107	0.0054901	1.13646e-16
Sex hormone-binding globulin levels	Estradiol levels	206927	rs11870307	0.0456418	0.00563803	5.71062e-16
Sex hormone-binding globulin levels	Estradiol levels	206927	rs12138136	0.0455868	0.00548665	9.6774e-17
Sex hormone-binding globulin levels	Estradiol levels	206927	rs1229492	0.0460737	0.00547405	3.87068e-17
Sex hormone-binding globulin levels	Estradiol levels	206927	rs12605524	0.0456237	0.00548559	9.02155e-17
Sex hormone-binding globulin levels	Estradiol levels	206927	rs12611046	0.0457774	0.0054872	7.26832e-17
Sex hormone-binding globulin levels	Estradiol levels	206927	rs12694450	0.0456811	0.00548747	8.45986e-17
Sex hormone-binding globulin levels	Estradiol levels	206927	rs12696304	0.0458231	0.00548568	6.64259e-17
Sex hormone-binding globulin levels	Estradiol levels	206927	rs12797706	0.045949	0.00548509	5.42598e-17
Sex hormone-binding globulin levels	Estradiol levels	206927	rs12950562	0.0456232	0.00549262	9.87467e-17
Sex hormone-binding globulin levels	Estradiol levels	206927	rs12953087	0.0453989	0.00545315	8.4138e-17
Sex hormone-binding globulin levels	Estradiol levels	206927	rs12989596	0.0455214	0.00547715	9.4775e-17
Sex hormone-binding globulin levels	Estradiol levels	206927	rs13108218	0.0457267	0.00552376	1.25055e-16
Sex hormone-binding globulin levels	Estradiol levels	206927	rs13150068	0.0459076	0.00551705	8.71981e-17
Sex hormone-binding globulin levels	Estradiol levels	206927	rs13379043	0.0457151	0.005489	8.18793e-17
Sex hormone-binding globulin levels	Estradiol levels	206927	rs138611541	0.0457646	0.00548924	7.61017e-17
Sex hormone-binding globulin levels	Estradiol levels	206927	rs138820	0.0456578	0.0054869	8.7045e-17
Sex hormone-binding globulin levels	Estradiol levels	206927	rs1415293	0.045698	0.00548845	8.34649e-17
Sex hormone-binding globulin levels	Estradiol levels	206927	rs144647926	0.0459294	0.00547461	4.88097e-17
Sex hormone-binding globulin levels	Estradiol levels	206927	rs149131600	0.0465452	0.00546149	1.56231e-17
Sex hormone-binding globulin levels	Estradiol levels	206927	rs150844304	0.0442852	0.00546926	5.62817e-16
Sex hormone-binding globulin levels	Estradiol levels	206927	rs1538648	0.045979	0.00547137	4.33141e-17
Sex hormone-binding globulin levels	Estradiol levels	206927	rs157935	0.0454535	0.00548575	1.17381e-16
Sex hormone-binding globulin levels	Estradiol levels	206927	rs17036326	0.0456873	0.00549449	9.16636e-17
Sex hormone-binding globulin levels	Estradiol levels	206927	rs17145750	0.0456752	0.00548924	8.73314e-17
Sex hormone-binding globulin levels	Estradiol levels	206927	rs1730865	0.0438726	0.00544749	8.03131e-16
Sex hormone-binding globulin levels	Estradiol levels	206927	rs1736180	0.0456007	0.00550353	1.174e-16
Sex hormone-binding globulin levels	Estradiol levels	206927	rs174529	0.0450547	0.00536826	4.74749e-17
Sex hormone-binding globulin levels	Estradiol levels	206927	rs17580	0.0463118	0.00546676	2.42206e-17
Sex hormone-binding globulin levels	Estradiol levels	206927	rs1776899	0.0458613	0.00548462	6.17701e-17
Sex hormone-binding globulin levels	Estradiol levels	206927	rs1782652	0.0454987	0.00549161	1.17982e-16
Sex hormone-binding globulin levels	Estradiol levels	206927	rs1801689	0.0464087	0.00543956	1.44213e-17
Sex hormone-binding globulin levels	Estradiol levels	206927	rs1860018	0.0458945	0.00548391	5.81422e-17
Sex hormone-binding globulin levels	Estradiol levels	206927	rs187079266	0.0457109	0.00550712	1.03824e-16
Sex hormone-binding globulin levels	Estradiol levels	206927	rs1871395	0.0459168	0.00552707	9.7632e-17
Sex hormone-binding globulin levels	Estradiol levels	206927	rs187437	0.0455002	0.00547927	1.00611e-16
Sex hormone-binding globulin levels	Estradiol levels	206927	rs202200760	0.0455784	0.00553477	1.79664e-16
Sex hormone-binding globulin levels	Estradiol levels	206927	rs2045345	0.0458381	0.00548884	6.76102e-17
Sex hormone-binding globulin levels	Estradiol levels	206927	rs2073503	0.0456875	0.00548757	8.38736e-17
Sex hormone-binding globulin levels	Estradiol levels	206927	rs2123050	0.0458146	0.00548886	7.01203e-17
Sex hormone-binding globulin levels	Estradiol levels	206927	rs2138161	0.0453912	0.00548663	1.30578e-16
Sex hormone-binding globulin levels	Estradiol levels	206927	rs2239222	0.0456064	0.00549168	1.0013e-16
Sex hormone-binding globulin levels	Estradiol levels	206927	rs2256657	0.0454348	0.00547988	1.12105e-16
Sex hormone-binding globulin levels	Estradiol levels	206927	rs2259305	0.0457545	0.00549578	8.40608e-17
Sex hormone-binding globulin levels	Estradiol levels	206927	rs2266782	0.0459969	0.00546977	4.12517e-17
Sex hormone-binding globulin levels	Estradiol levels	206927	rs2298058	0.04601	0.00548102	4.68169e-17
Sex hormone-binding globulin levels	Estradiol levels	206927	rs2301050	0.0459416	0.00546732	4.35422e-17
Sex hormone-binding globulin levels	Estradiol levels	206927	rs2330649	0.0454533	0.00548112	1.107e-16
Sex hormone-binding globulin levels	Estradiol levels	206927	rs2351958	0.0460419	0.00547653	4.2015e-17
Sex hormone-binding globulin levels	Estradiol levels	206927	rs2575368	0.0455636	0.00547947	9.14952e-17
Sex hormone-binding globulin levels	Estradiol levels	206927	rs2612069	0.0457853	0.0054874	7.19997e-17
Sex hormone-binding globulin levels	Estradiol levels	206927	rs2642438	0.0459376	0.00549585	6.34737e-17
Sex hormone-binding globulin levels	Estradiol levels	206927	rs2694157	0.0460562	0.0054683	3.68843e-17
Sex hormone-binding globulin levels	Estradiol levels	206927	rs2721195	0.045481	0.0054879	1.1566e-16
Sex hormone-binding globulin levels	Estradiol levels	206927	rs28394864	0.0461503	0.00555003	9.15069e-17
Sex hormone-binding globulin levels	Estradiol levels	206927	rs28507491	0.0462643	0.0054747	2.89914e-17
Sex hormone-binding globulin levels	Estradiol levels	206927	rs28549287	0.0454776	0.00548405	1.10713e-16
Sex hormone-binding globulin levels	Estradiol levels	206927	rs28601761	0.046241	0.00538199	8.56242e-18
Sex hormone-binding globulin levels	Estradiol levels	206927	rs2862954	0.0457631	0.00549389	8.09708e-17
Sex hormone-binding globulin levels	Estradiol levels	206927	rs2872881	0.0458539	0.00548554	6.323e-17
Sex hormone-binding globulin levels	Estradiol levels	206927	rs28773027	0.0456145	0.0054855	9.1385e-17
Sex hormone-binding globulin levels	Estradiol levels	206927	rs28929474	0.047498	0.00557456	1.58873e-17
Sex hormone-binding globulin levels	Estradiol levels	206927	rs2896906	0.0452669	0.00543621	8.29695e-17
Sex hormone-binding globulin levels	Estradiol levels	206927	rs2905801	0.0459229	0.00549383	6.32528e-17
Sex hormone-binding globulin levels	Estradiol levels	206927	rs2914233	0.045713	0.00548857	8.16922e-17
Sex hormone-binding globulin levels	Estradiol levels	206927	rs2924545	0.0458917	0.00547762	5.38169e-17
Sex hormone-binding globulin levels	Estradiol levels	206927	rs2989330	0.0458548	0.00548297	6.10801e-17
Sex hormone-binding globulin levels	Estradiol levels	206927	rs3006593	0.0455318	0.00547953	9.61643e-17
Sex hormone-binding globulin levels	Estradiol levels	206927	rs3173833	0.0456866	0.00548907	8.56198e-17
Sex hormone-binding globulin levels	Estradiol levels	206927	rs34255979	0.0449058	0.00547704	2.42562e-16
Sex hormone-binding globulin levels	Estradiol levels	206927	rs34415062	0.0458356	0.0054838	6.35875e-17
Sex hormone-binding globulin levels	Estradiol levels	206927	rs34587839	0.0457646	0.00549093	7.77708e-17
Sex hormone-binding globulin levels	Estradiol levels	206927	rs34858588	0.045562	0.00548531	9.88295e-17
Sex hormone-binding globulin levels	Estradiol levels	206927	rs34869253	0.0457319	0.00548974	8.05464e-17
Sex hormone-binding globulin levels	Estradiol levels	206927	rs35135293	0.0460954	0.00544903	2.688e-17
Sex hormone-binding globulin levels	Estradiol levels	206927	rs35234337	0.0457062	0.0054882	8.21653e-17
Sex hormone-binding globulin levels	Estradiol levels	206927	rs35346083	0.0461885	0.00546213	2.76393e-17
Sex hormone-binding globulin levels	Estradiol levels	206927	rs36086195	0.0453504	0.00549889	1.62162e-16
Sex hormone-binding globulin levels	Estradiol levels	206927	rs3730393	0.0458698	0.00548272	5.94838e-17
Sex hormone-binding globulin levels	Estradiol levels	206927	rs3768321	0.0463218	0.00546026	2.18623e-17
Sex hormone-binding globulin levels	Estradiol levels	206927	rs3795128	0.0459717	0.00548205	5.03544e-17
Sex hormone-binding globulin levels	Estradiol levels	206927	rs3890483	0.0458883	0.00549092	6.42611e-17
Sex hormone-binding globulin levels	Estradiol levels	206927	rs3891167	0.0453515	0.00544443	8.09185e-17
Sex hormone-binding globulin levels	Estradiol levels	206927	rs40270	0.0456492	0.00549544	9.8365e-17
Sex hormone-binding globulin levels	Estradiol levels	206927	rs4092465	0.0459077	0.00548184	5.54561e-17
Sex hormone-binding globulin levels	Estradiol levels	206927	rs42945	0.0457897	0.00548986	7.37987e-17
Sex hormone-binding globulin levels	Estradiol levels	206927	rs4297769	0.0456709	0.0054985	9.89267e-17
Sex hormone-binding globulin levels	Estradiol levels	206927	rs4327534	0.0457712	0.0054872	7.33917e-17
Sex hormone-binding globulin levels	Estradiol levels	206927	rs4671607	0.0460259	0.00549202	5.26989e-17
Sex hormone-binding globulin levels	Estradiol levels	206927	rs4675682	0.0461303	0.00545857	2.88831e-17
Sex hormone-binding globulin levels	Estradiol levels	206927	rs4715316	0.0456654	0.00548954	8.89961e-17
Sex hormone-binding globulin levels	Estradiol levels	206927	rs4719366	0.0460525	0.00546182	3.40628e-17
Sex hormone-binding globulin levels	Estradiol levels	206927	rs4819867	0.0459684	0.00546389	3.99224e-17
Sex hormone-binding globulin levels	Estradiol levels	206927	rs4841133	0.0466368	0.00541822	7.47399e-18
Sex hormone-binding globulin levels	Estradiol levels	206927	rs4918722	0.0457235	0.00549045	8.23462e-17
Sex hormone-binding globulin levels	Estradiol levels	206927	rs540730	0.0453389	0.00549376	1.54723e-16
Sex hormone-binding globulin levels	Estradiol levels	206927	rs55729432	0.0458559	0.00548808	6.51361e-17
Sex hormone-binding globulin levels	Estradiol levels	206927	rs55869502	0.045749	0.00549475	8.36637e-17
Sex hormone-binding globulin levels	Estradiol levels	206927	rs55987409	0.0458481	0.0054843	6.27756e-17
Sex hormone-binding globulin levels	Estradiol levels	206927	rs56077345	0.0457999	0.00548658	6.96517e-17
Sex hormone-binding globulin levels	Estradiol levels	206927	rs56332871	0.0448313	0.00552353	4.80092e-16
Sex hormone-binding globulin levels	Estradiol levels	206927	rs57158761	0.0455604	0.00547933	9.17869e-17
Sex hormone-binding globulin levels	Estradiol levels	206927	rs58414555	0.0455744	0.0054819	9.28342e-17
Sex hormone-binding globulin levels	Estradiol levels	206927	rs58912472	0.0458951	0.00547859	5.42113e-17
Sex hormone-binding globulin levels	Estradiol levels	206927	rs59203582	0.045289	0.00548032	1.40956e-16
Sex hormone-binding globulin levels	Estradiol levels	206927	rs60018147	0.0459779	0.0054748	4.53802e-17
Sex hormone-binding globulin levels	Estradiol levels	206927	rs6005840	0.0455365	0.00550263	1.28005e-16
Sex hormone-binding globulin levels	Estradiol levels	206927	rs6088461	0.0458333	0.00548619	6.58219e-17
Sex hormone-binding globulin levels	Estradiol levels	206927	rs6130613	0.0455684	0.00550673	1.28418e-16
Sex hormone-binding globulin levels	Estradiol levels	206927	rs61686644	0.0454146	0.00547169	1.04191e-16
Sex hormone-binding globulin levels	Estradiol levels	206927	rs62011286	0.045874	0.00549357	6.7981e-17
Sex hormone-binding globulin levels	Estradiol levels	206927	rs62259939	0.046076	0.00546746	3.53703e-17
Sex hormone-binding globulin levels	Estradiol levels	206927	rs624319	0.0454547	0.0054983	1.37322e-16
Sex hormone-binding globulin levels	Estradiol levels	206927	rs62472728	0.0457342	0.00548986	8.038e-17
Sex hormone-binding globulin levels	Estradiol levels	206927	rs62618693	0.0456722	0.00548912	8.75914e-17
Sex hormone-binding globulin levels	Estradiol levels	206927	rs631695	0.0448949	0.00546926	2.23801e-16
Sex hormone-binding globulin levels	Estradiol levels	206927	rs6422513	0.045772	0.00549321	7.91747e-17
Sex hormone-binding globulin levels	Estradiol levels	206927	rs6480299	0.0455613	0.0054895	1.04357e-16
Sex hormone-binding globulin levels	Estradiol levels	206927	rs6532796	0.0452723	0.00550231	1.9057e-16
Sex hormone-binding globulin levels	Estradiol levels	206927	rs6541725	0.0457914	0.00548783	7.17164e-17
Sex hormone-binding globulin levels	Estradiol levels	206927	rs6717858	0.045288	0.0054714	1.26083e-16
Sex hormone-binding globulin levels	Estradiol levels	206927	rs6736913	0.0458599	0.00548855	6.51242e-17
Sex hormone-binding globulin levels	Estradiol levels	206927	rs6758199	0.046022	0.00547055	4.00747e-17
Sex hormone-binding globulin levels	Estradiol levels	206927	rs6792725	0.0455848	0.00549161	1.03401e-16
Sex hormone-binding globulin levels	Estradiol levels	206927	rs6900473	0.0455834	0.00548603	9.65198e-17
Sex hormone-binding globulin levels	Estradiol levels	206927	rs6939861	0.04598	0.00548157	4.94004e-17
Sex hormone-binding globulin levels	Estradiol levels	206927	rs6950023	0.0460187	0.00553099	8.78538e-17
Sex hormone-binding globulin levels	Estradiol levels	206927	rs7085615	0.045601	0.00551165	1.30007e-16
Sex hormone-binding globulin levels	Estradiol levels	206927	rs7092853	0.0460118	0.00546754	3.91349e-17
Sex hormone-binding globulin levels	Estradiol levels	206927	rs7127472	0.0456117	0.00548575	9.20758e-17
Sex hormone-binding globulin levels	Estradiol levels	206927	rs71480542	0.0456386	0.00548578	8.8382e-17
Sex hormone-binding globulin levels	Estradiol levels	206927	rs7177179	0.045716	0.00548857	8.13204e-17
Sex hormone-binding globulin levels	Estradiol levels	206927	rs720130	0.0455603	0.00547885	9.1235e-17
Sex hormone-binding globulin levels	Estradiol levels	206927	rs7225349	0.0457343	0.00549254	8.3183e-17
Sex hormone-binding globulin levels	Estradiol levels	206927	rs72666817	0.0456304	0.00548697	9.08676e-17
Sex hormone-binding globulin levels	Estradiol levels	206927	rs72683923	0.0453817	0.00547226	1.10384e-16
Sex hormone-binding globulin levels	Estradiol levels	206927	rs72787581	0.0452762	0.0054331	7.85565e-17
Sex hormone-binding globulin levels	Estradiol levels	206927	rs72842811	0.0463165	0.00551137	4.32193e-17
Sex hormone-binding globulin levels	Estradiol levels	206927	rs72929847	0.0457214	0.00549333	8.57059e-17
Sex hormone-binding globulin levels	Estradiol levels	206927	rs72948115	0.0455738	0.00548269	9.38701e-17
Sex hormone-binding globulin levels	Estradiol levels	206927	rs7314285	0.045261	0.00548921	1.64544e-16
Sex hormone-binding globulin levels	Estradiol levels	206927	rs731839	0.0456866	0.00548775	8.41901e-17
Sex hormone-binding globulin levels	Estradiol levels	206927	rs738409	0.0465767	0.00551969	3.22039e-17
Sex hormone-binding globulin levels	Estradiol levels	206927	rs7430950	0.0459101	0.00547892	5.3195e-17
Sex hormone-binding globulin levels	Estradiol levels	206927	rs74551598	0.0453492	0.00544814	8.51986e-17
Sex hormone-binding globulin levels	Estradiol levels	206927	rs75130744	0.0454272	0.00549763	1.41996e-16
Sex hormone-binding globulin levels	Estradiol levels	206927	rs7540115	0.0456364	0.00548688	8.99441e-17
Sex hormone-binding globulin levels	Estradiol levels	206927	rs75631642	0.0454102	0.00545745	8.73876e-17
Sex hormone-binding globulin levels	Estradiol levels	206927	rs76895963	0.0457139	0.00550113	9.57749e-17
Sex hormone-binding globulin levels	Estradiol levels	206927	rs77483564	0.0462325	0.00542161	1.49613e-17
Sex hormone-binding globulin levels	Estradiol levels	206927	rs776746	0.0459896	0.00547042	4.20799e-17
Sex hormone-binding globulin levels	Estradiol levels	206927	rs7773423	0.0456889	0.00548878	8.50036e-17
Sex hormone-binding globulin levels	Estradiol levels	206927	rs7860634	0.0459894	0.00548916	5.37295e-17
Sex hormone-binding globulin levels	Estradiol levels	206927	rs78679318	0.0459773	0.00546757	4.13148e-17
Sex hormone-binding globulin levels	Estradiol levels	206927	rs78890745	0.0454719	0.00547742	1.02635e-16
Sex hormone-binding globulin levels	Estradiol levels	206927	rs7920217	0.045513	0.00547871	9.79502e-17
Sex hormone-binding globulin levels	Estradiol levels	206927	rs79287178	0.0457519	0.00549855	8.7427e-17
Sex hormone-binding globulin levels	Estradiol levels	206927	rs79391862	0.0458422	0.00552297	1.03868e-16
Sex hormone-binding globulin levels	Estradiol levels	206927	rs7970695	0.0463305	0.00549662	3.48868e-17
Sex hormone-binding globulin levels	Estradiol levels	206927	rs79717793	0.0457168	0.00550984	1.06513e-16
Sex hormone-binding globulin levels	Estradiol levels	206927	rs79760705	0.0457159	0.00549456	8.77957e-17
Sex hormone-binding globulin levels	Estradiol levels	206927	rs8071650	0.0455114	0.00548122	1.01388e-16
Sex hormone-binding globulin levels	Estradiol levels	206927	rs8113367	0.0454781	0.00547229	9.52075e-17
Sex hormone-binding globulin levels	Estradiol levels	206927	rs816040	0.0457268	0.00548923	8.06497e-17
Sex hormone-binding globulin levels	Estradiol levels	206927	rs820503	0.0455891	0.00548516	9.4618e-17
Sex hormone-binding globulin levels	Estradiol levels	206927	rs838716	0.0458379	0.00548387	6.34254e-17
Sex hormone-binding globulin levels	Estradiol levels	206927	rs849135	0.0455337	0.00548678	1.0516e-16
Sex hormone-binding globulin levels	Estradiol levels	206927	rs858526	0.0459306	0.00564634	4.13355e-16
Sex hormone-binding globulin levels	Estradiol levels	206927	rs876435	0.0455629	0.00548224	9.4897e-17
Sex hormone-binding globulin levels	Estradiol levels	206927	rs9265285	0.0459	0.00549014	6.24809e-17
Sex hormone-binding globulin levels	Estradiol levels	206927	rs9288177	0.0457738	0.0054901	7.5869e-17
Sex hormone-binding globulin levels	Estradiol levels	206927	rs9304665	0.045662	0.00548725	8.68685e-17
Sex hormone-binding globulin levels	Estradiol levels	206927	rs9379084	0.0455916	0.00548918	9.9218e-17
Sex hormone-binding globulin levels	Estradiol levels	206927	rs9461224	0.0461111	0.00547323	3.61211e-17
Sex hormone-binding globulin levels	Estradiol levels	206927	rs9492	0.0459801	0.0054647	3.96175e-17
Sex hormone-binding globulin levels	Estradiol levels	206927	rs9697210	0.0461554	0.00548186	3.77581e-17
Sex hormone-binding globulin levels	Estradiol levels	206927	rs9739640	0.0459283	0.00547498	4.913e-17
Sex hormone-binding globulin levels	Estradiol levels	206927	All	0.0457192	0.00547173	6.5143e-17

## Sheet: Table S17
Supplementary Table S19: Leave one out analysis for the effect of BioT level on SHBG level.
Exposure	Outcome	Samplesize	SNP	beta	se	p
Bioavailable testosterone levels	Sex hormone-binding globulin levels	180726	rs10279715	-0.0442093	0.00899567	8.90063e-07
Bioavailable testosterone levels	Sex hormone-binding globulin levels	180726	rs10738700	-0.0435509	0.00900882	1.33649e-06
Bioavailable testosterone levels	Sex hormone-binding globulin levels	180726	rs10867084	-0.0439195	0.00901909	1.1182e-06
Bioavailable testosterone levels	Sex hormone-binding globulin levels	180726	rs10982156	-0.0433988	0.00901959	1.49713e-06
Bioavailable testosterone levels	Sex hormone-binding globulin levels	180726	rs1112195	-0.043551	0.00899963	1.3036e-06
Bioavailable testosterone levels	Sex hormone-binding globulin levels	180726	rs112217694	-0.0441435	0.00901013	9.61679e-07
Bioavailable testosterone levels	Sex hormone-binding globulin levels	180726	rs114492985	-0.0428081	0.00886243	1.36336e-06
Bioavailable testosterone levels	Sex hormone-binding globulin levels	180726	rs114548805	-0.0435848	0.00900631	1.3026e-06
Bioavailable testosterone levels	Sex hormone-binding globulin levels	180726	rs115260227	-0.0410478	0.00910034	6.46503e-06
Bioavailable testosterone levels	Sex hormone-binding globulin levels	180726	rs1272131	-0.041517	0.00874795	2.07574e-06
Bioavailable testosterone levels	Sex hormone-binding globulin levels	180726	rs13028479	-0.0408363	0.00871762	2.80864e-06
Bioavailable testosterone levels	Sex hormone-binding globulin levels	180726	rs13065463	-0.0438876	0.00901476	1.12495e-06
Bioavailable testosterone levels	Sex hormone-binding globulin levels	180726	rs13835	-0.043321	0.00898798	1.43646e-06
Bioavailable testosterone levels	Sex hormone-binding globulin levels	180726	rs145359938	-0.0436839	0.00902019	1.27953e-06
Bioavailable testosterone levels	Sex hormone-binding globulin levels	180726	rs146115416	-0.0442492	0.00900655	8.96927e-07
Bioavailable testosterone levels	Sex hormone-binding globulin levels	180726	rs17703883	-0.0416728	0.00902318	3.86689e-06
Bioavailable testosterone levels	Sex hormone-binding globulin levels	180726	rs1812755	-0.0442774	0.00902701	9.34306e-07
Bioavailable testosterone levels	Sex hormone-binding globulin levels	180726	rs2011425	-0.0461543	0.00871495	1.18372e-07
Bioavailable testosterone levels	Sex hormone-binding globulin levels	180726	rs2090409	-0.0445754	0.00902025	7.74442e-07
Bioavailable testosterone levels	Sex hormone-binding globulin levels	180726	rs2327121	-0.0436177	0.00899732	1.24802e-06
Bioavailable testosterone levels	Sex hormone-binding globulin levels	180726	rs2438086	-0.0428939	0.00896216	1.70046e-06
Bioavailable testosterone levels	Sex hormone-binding globulin levels	180726	rs2631864	-0.0445677	0.0089355	6.10971e-07
Bioavailable testosterone levels	Sex hormone-binding globulin levels	180726	rs2668776	-0.0442283	0.00904686	1.01454e-06
Bioavailable testosterone levels	Sex hormone-binding globulin levels	180726	rs2764772	-0.0456776	0.00897377	3.57836e-07
Bioavailable testosterone levels	Sex hormone-binding globulin levels	180726	rs2959132	-0.0445956	0.00891252	5.62396e-07
Bioavailable testosterone levels	Sex hormone-binding globulin levels	180726	rs2961853	-0.0439952	0.0089966	1.00734e-06
Bioavailable testosterone levels	Sex hormone-binding globulin levels	180726	rs3020421	-0.0447892	0.0088381	4.0257e-07
Bioavailable testosterone levels	Sex hormone-binding globulin levels	180726	rs34040779	-0.0444591	0.00892916	6.38814e-07
Bioavailable testosterone levels	Sex hormone-binding globulin levels	180726	rs34192788	-0.0433571	0.00898747	1.40589e-06
Bioavailable testosterone levels	Sex hormone-binding globulin levels	180726	rs3742223	-0.0433903	0.00903065	1.54918e-06
Bioavailable testosterone levels	Sex hormone-binding globulin levels	180726	rs4562360	-0.0417402	0.00884942	2.39679e-06
Bioavailable testosterone levels	Sex hormone-binding globulin levels	180726	rs4872310	-0.0424558	0.00885188	1.61662e-06
Bioavailable testosterone levels	Sex hormone-binding globulin levels	180726	rs503542	-0.0432612	0.00897815	1.44645e-06
Bioavailable testosterone levels	Sex hormone-binding globulin levels	180726	rs55795858	-0.0436366	0.00899574	1.22961e-06
Bioavailable testosterone levels	Sex hormone-binding globulin levels	180726	rs57606486	-0.0436765	0.00899792	1.20954e-06
Bioavailable testosterone levels	Sex hormone-binding globulin levels	180726	rs62041532	-0.0431578	0.00897292	1.51095e-06
Bioavailable testosterone levels	Sex hormone-binding globulin levels	180726	rs6486542	-0.0448128	0.00896437	5.76335e-07
Bioavailable testosterone levels	Sex hormone-binding globulin levels	180726	rs6718154	-0.0431592	0.00904536	1.82929e-06
Bioavailable testosterone levels	Sex hormone-binding globulin levels	180726	rs7089031	-0.0426686	0.00885014	1.42671e-06
Bioavailable testosterone levels	Sex hormone-binding globulin levels	180726	rs714786	-0.0430372	0.00897138	1.60926e-06
Bioavailable testosterone levels	Sex hormone-binding globulin levels	180726	rs71529289	-0.046632	0.00872362	9.01726e-08
Bioavailable testosterone levels	Sex hormone-binding globulin levels	180726	rs7265992	-0.0428903	0.00898367	1.80376e-06
Bioavailable testosterone levels	Sex hormone-binding globulin levels	180726	rs72664935	-0.0445164	0.00892486	6.10348e-07
Bioavailable testosterone levels	Sex hormone-binding globulin levels	180726	rs745486	-0.0431875	0.00897735	1.50386e-06
Bioavailable testosterone levels	Sex hormone-binding globulin levels	180726	rs76592891	-0.0438801	0.00899828	1.07985e-06
Bioavailable testosterone levels	Sex hormone-binding globulin levels	180726	rs7679843	-0.0449798	0.00897845	5.45018e-07
Bioavailable testosterone levels	Sex hormone-binding globulin levels	180726	rs7700874	-0.043762	0.00900505	1.17553e-06
Bioavailable testosterone levels	Sex hormone-binding globulin levels	180726	rs7758796	-0.0431388	0.00904293	1.8382e-06
Bioavailable testosterone levels	Sex hormone-binding globulin levels	180726	rs7857865	-0.042221	0.00869533	1.20026e-06
Bioavailable testosterone levels	Sex hormone-binding globulin levels	180726	rs7912521	-0.0477055	0.00923751	2.41312e-07
Bioavailable testosterone levels	Sex hormone-binding globulin levels	180726	rs7915430	-0.0449815	0.0087611	2.83306e-07
Bioavailable testosterone levels	Sex hormone-binding globulin levels	180726	rs7928369	-0.0440348	0.00900777	1.01585e-06
Bioavailable testosterone levels	Sex hormone-binding globulin levels	180726	rs8076703	-0.0432512	0.00900576	1.56611e-06
Bioavailable testosterone levels	Sex hormone-binding globulin levels	180726	rs912202	-0.0409592	0.00892314	4.42783e-06
Bioavailable testosterone levels	Sex hormone-binding globulin levels	180726	rs9322822	-0.0433862	0.00920135	2.41469e-06
Bioavailable testosterone levels	Sex hormone-binding globulin levels	180726	rs950716	-0.0456741	0.00873053	1.68111e-07
Bioavailable testosterone levels	Sex hormone-binding globulin levels	180726	rs9824196	-0.0436892	0.0090265	1.29769e-06
Bioavailable testosterone levels	Sex hormone-binding globulin levels	180726	rs9986829	-0.0444276	0.00931945	1.86807e-06
Bioavailable testosterone levels	Sex hormone-binding globulin levels	180726	All	-0.0437017	0.00888672	8.75916e-07
